# Supplementary material for: Epidemiological scenarios for human rabies exposure notified in Colombia during ten years: A challenge to implement surveillance actions with a differential approach on vulnerable populations
Source: PubMed Central journal article supplement (PMC6934280; doi:10.1371/journal.pone.0213120), 2019-12-27
Supplement: pone.0213120.s001.pdf [file pone.0213120.s001.pdf]

**S1\_TABLE. Incidence rates of HRE per 100.000 habitants by year in all cities of Colombia, 2007-2016.**

| DEPARMENT | CITY             | 2007   | 2008   | 2009   | 2010   | 2011   | 2012   | 2013   | 2014   | 2015   | 2016   |
|-----------|------------------|--------|--------|--------|--------|--------|--------|--------|--------|--------|--------|
| Amazonas  | El Encanto       | 0,00   | 0,00   | 21,88  | 0,00   | 85,78  | 0,00   | 0,00   | 0,00   | 20,66  | 0,00   |
| Amazonas  | La Chorrera      | 0,00   | 0,00   | 0,00   | 27,72  | 0,00   | 0,00   | 26,53  | 26,15  | 0,00   | 25,43  |
| Amazonas  | La Pedrera       | 25,33  | 0,00   | 0,00   | 46,31  | 0,00   | 0,00   | 84,91  | 20,64  | 0,00   | 19,51  |
| Amazonas  | La Victoria      | 0,00   | 0,00   | 0,00   | 0,00   | 0,00   | 0,00   | 0,00   | 0,00   | 0,00   | 0,00   |
| Amazonas  | Leticia          | 101,01 | 5,13   | 185,67 | 302,52 | 297,44 | 361,91 | 334,37 | 348,78 | 510,57 | 384,26 |
| Amazonas  | Miriti - Paraná  | 123,99 | 0,00   | 0,00   | 0,00   | 0,00   | 0,00   | 0,00   | 65,02  | 65,32  | 0,00   |
| Amazonas  | Puerto Alegría   | 0,00   | 0,00   | 0,00   | 0,00   | 60,79  | 116,62 | 55,93  | 0,00   | 0,00   | 0,00   |
| Amazonas  | Puerto Arica     | 0,00   | 0,00   | 0,00   | 0,00   | 71,99  | 0,00   | 0,00   | 0,00   | 0,00   | 0,00   |
| Amazonas  | Puerto Nariño    | 0,00   | 0,00   | 13,41  | 13,20  | 130,02 | 76,84  | 126,18 | 49,73  | 98,02  | 277,81 |
| Amazonas  | Puerto Santander | 80,65  | 0,00   | 0,00   | 75,59  | 0,00   | 0,00   | 0,00   | 0,00   | 0,00   | 33,43  |
| Amazonas  | Tarapacá         | 0,00   | 0,00   | 151,90 | 25,05  | 0,00   | 24,55  | 0,00   | 120,37 | 119,19 | 23,62  |
| Antioquia | Abejorral        | 0,00   | 14,98  | 4,99   | 74,92  | 134,85 | 134,85 | 189,79 | 124,86 | 184,80 | 214,76 |
| Antioquia | Abriaquí         | 0,00   | 0,00   | 0,00   | 0,00   | 0,00   | 43,67  | 89,65  | 459,77 | 375,94 | 240,96 |
| Antioquia | Alejandro        | 0,00   | 26,85  | 27,11  | 136,91 | 27,64  | 0,00   | 84,51  | 114,22 | 173,11 | 320,23 |
| Antioquia | Amagá            | 0,00   | 146,69 | 188,00 | 137,16 | 146,53 | 131,50 | 185,46 | 204,51 | 426,32 | 302,32 |
| Antioquia | Amalfi           | 0,00   | 76,24  | 56,77  | 4,70   | 0,00   | 92,53  | 142,41 | 145,91 | 167,51 | 197,73 |
| Antioquia | Andes            | 0,00   | 137,68 | 50,82  | 144,12 | 185,73 | 177,24 | 171,13 | 184,95 | 157,16 | 190,39 |
| Antioquia | Angelópolis      | 0,00   | 24,89  | 24,54  | 0,00   | 35,65  | 233,89 | 138,25 | 113,56 | 44,71  | 55,05  |
| Antioquia | Angostura        | 0,00   | 16,43  | 58,11  | 83,82  | 50,80  | 94,06  | 103,64 | 148,29 | 211,38 | 160,14 |
| Antioquia | Anorí            | 0,00   | 70,49  | 101,19 | 87,36  | 86,22  | 18,24  | 114,06 | 106,70 | 163,88 | 132,92 |
| Antioquia | Anza             | 0,00   | 13,39  | 26,72  | 40,00  | 26,61  | 92,97  | 172,35 | 79,41  | 0,00   | 79,16  |
| Antioquia | Apartadó         | 0,00   | 18,02  | 27,56  | 26,74  | 12,65  | 86,55  | 103,04 | 135,83 | 135,20 | 117,57 |
| Antioquia | Arboletes        | 0,00   | 122,81 | 119,56 | 110,76 | 99,59  | 153,54 | 173,23 | 199,42 | 137,00 | 82,51  |
| Antioquia | Argelia          | 0,00   | 0,00   | 21,02  | 85,27  | 140,69 | 186,65 | 89,21  | 226,32 | 183,93 | 128,24 |

|           |                |       |        |        |        |        |        |        |        |        |        |
|-----------|----------------|-------|--------|--------|--------|--------|--------|--------|--------|--------|--------|
| Antioquia | Armenia        | 0,00  | 123,00 | 251,31 | 235,39 | 262,12 | 379,13 | 342,23 | 255,99 | 237,53 | 316,30 |
| Antioquia | Barbosa        | 0,00  | 8,96   | 15,41  | 86,62  | 112,88 | 270,32 | 344,31 | 257,74 | 343,64 | 365,88 |
| Antioquia | Bello          | 0,00  | 51,68  | 69,89  | 73,82  | 77,57  | 93,95  | 115,83 | 167,49 | 165,18 | 157,55 |
| Antioquia | Belmira        | 0,00  | 31,42  | 140,19 | 123,48 | 76,52  | 30,35  | 15,05  | 119,24 | 29,59  | 87,94  |
| Antioquia | Betania        | 0,00  | 60,13  | 131,57 | 61,36  | 41,29  | 281,66 | 158,11 | 276,95 | 193,84 | 130,61 |
| Antioquia | Betulia        | 0,00  | 105,93 | 111,23 | 0,00   | 139,17 | 225,21 | 224,02 | 177,39 | 193,82 | 136,32 |
| Antioquia | Briceño        | 0,00  | 34,24  | 11,42  | 11,44  | 34,34  | 126,03 | 137,61 | 91,84  | 91,93  | 126,55 |
| Antioquia | Buriticá       | 0,00  | 0,00   | 0,00   | 73,64  | 59,19  | 89,34  | 134,55 | 210,43 | 196,94 | 182,76 |
| Antioquia | Cáceres        | 0,00  | 6,38   | 3,11   | 51,45  | 64,80  | 25,81  | 22,33  | 86,95  | 15,87  | 30,89  |
| Antioquia | Caicedo        | 0,00  | 25,54  | 63,40  | 63,01  | 75,08  | 74,53  | 209,90 | 73,52  | 36,56  | 169,18 |
| Antioquia | Caldas         | 0,00  | 170,10 | 116,48 | 9,58   | 159,31 | 202,58 | 190,83 | 122,21 | 274,90 | 261,57 |
| Antioquia | Campamento     | 0,00  | 0,00   | 21,19  | 74,58  | 32,15  | 32,36  | 43,44  | 65,58  | 187,00 | 88,54  |
| Antioquia | Cañasgordas    | 0,00  | 77,25  | 130,80 | 101,14 | 136,84 | 172,69 | 131,11 | 125,17 | 89,48  | 161,18 |
| Antioquia | Caracolí       | 0,00  | 167,33 | 168,39 | 423,19 | 404,26 | 321,13 | 172,19 | 281,63 | 239,39 | 175,09 |
| Antioquia | Caramanta      | 0,00  | 54,75  | 91,59  | 165,41 | 92,03  | 184,84 | 203,89 | 316,57 | 130,55 | 224,72 |
| Antioquia | Carepa         | 0,00  | 49,28  | 25,06  | 12,21  | 53,56  | 131,50 | 143,27 | 99,26  | 100,38 | 173,02 |
| Antioquia | Carolina       | 0,00  | 0,00   | 0,00   | 0,00   | 26,60  | 241,03 | 81,17  | 109,53 | 192,89 | 167,46 |
| Antioquia | Caucasia       | 0,00  | 71,97  | 66,07  | 31,22  | 22,60  | 23,01  | 84,20  | 53,88  | 49,03  | 77,46  |
| Antioquia | Chigorodó      | 0,00  | 54,90  | 116,18 | 90,91  | 114,74 | 134,47 | 173,91 | 133,23 | 140,42 | 165,07 |
| Antioquia | Cisneros       | 0,00  | 241,95 | 169,51 | 245,33 | 322,06 | 216,29 | 43,52  | 252,17 | 209,76 | 355,63 |
| Antioquia | Ciudad Bolívar | 64,17 | 82,33  | 150,98 | 90,26  | 25,38  | 123,83 | 146,33 | 69,83  | 140,30 | 211,45 |
| Antioquia | Cocorná        | 0,00  | 26,54  | 13,27  | 0,00   | 66,51  | 6,66   | 26,65  | 33,38  | 26,72  | 106,92 |
| Antioquia | Concepción     | 0,00  | 119,85 | 196,90 | 303,18 | 25,97  | 266,24 | 300,63 | 224,28 | 288,77 | 266,67 |
| Antioquia | Concordia      | 0,00  | 150,90 | 0,00   | 9,49   | 180,97 | 248,54 | 206,30 | 154,24 | 145,26 | 179,92 |
| Antioquia | Copacabana     | 0,00  | 117,23 | 29,29  | 19,76  | 12,00  | 167,29 | 173,89 | 285,71 | 326,35 | 313,93 |
| Antioquia | Dabeiba        | 0,00  | 50,15  | 50,29  | 71,44  | 63,23  | 84,59  | 127,33 | 85,21  | 64,16  | 55,84  |
| Antioquia | Don Matías     | 0,00  | 199,85 | 179,87 | 115,53 | 112,91 | 81,62  | 65,74  | 82,69  | 31,47  | 39,60  |

|           |                      |      |        |        |        |        |        |        |        |         |        |
|-----------|----------------------|------|--------|--------|--------|--------|--------|--------|--------|---------|--------|
| Antioquia | Ebéjico              | 0,00 | 87,93  | 175,79 | 135,78 | 103,88 | 159,80 | 223,54 | 167,70 | 223,73  | 127,90 |
| Antioquia | El Bagre             | 0,00 | 27,57  | 88,39  | 114,88 | 109,93 | 70,00  | 75,64  | 140,11 | 38,32   | 76,13  |
| Antioquia | El Carmen de Viboral | 0,00 | 84,37  | 53,20  | 88,99  | 283,76 | 248,93 | 94,34  | 236,10 | 440,63  | 414,03 |
| Antioquia | El Santuario         | 0,00 | 33,86  | 11,25  | 26,16  | 182,60 | 156,08 | 126,01 | 140,43 | 143,81  | 401,09 |
| Antioquia | Entrerrios           | 0,00 | 134,56 | 88,35  | 217,18 | 128,26 | 84,20  | 217,53 | 81,57  | 120,60  | 148,49 |
| Antioquia | Envigado             | 0,00 | 40,43  | 15,05  | 17,72  | 91,42  | 105,17 | 127,66 | 146,77 | 154,19  | 175,71 |
| Antioquia | Fredonia             | 0,00 | 151,77 | 192,93 | 121,79 | 194,97 | 401,17 | 247,51 | 248,99 | 23,19   | 219,36 |
| Antioquia | Frontino             | 0,00 | 52,82  | 32,29  | 93,18  | 94,90  | 119,41 | 162,22 | 230,20 | 216,67  | 208,45 |
| Antioquia | Giraldo              | 0,00 | 0,00   | 0,00   | 0,00   | 24,45  | 269,81 | 270,67 | 24,73  | 0,00    | 124,72 |
| Antioquia | Girardota            | 0,00 | 178,53 | 240,09 | 271,64 | 275,31 | 320,27 | 332,16 | 315,06 | 326,33  | 315,37 |
| Antioquia | Gómez Plata          | 0,00 | 127,65 | 92,46  | 0,00   | 8,19   | 8,10   | 15,98  | 86,87  | 117,10  | 169,70 |
| Antioquia | Granada              | 0,00 | 10,19  | 91,67  | 111,97 | 40,72  | 30,49  | 10,16  | 81,18  | 131,86  | 91,22  |
| Antioquia | Guadalupe            | 0,00 | 159,92 | 79,87  | 95,74  | 223,14 | 95,53  | 190,87 | 238,32 | 47,62   | 15,86  |
| Antioquia | Guarne               | 0,00 | 88,21  | 137,98 | 6,88   | 4,50   | 37,57  | 316,73 | 383,38 | 179,93  | 435,69 |
| Antioquia | Guatapé              | 0,00 | 422,83 | 88,92  | 89,83  | 562,92 | 311,47 | 537,63 | 674,41 | 1117,64 | 974,96 |
| Antioquia | Heliconia            | 0,00 | 108,81 | 62,97  | 222,89 | 161,06 | 114,04 | 181,52 | 133,67 | 253,98  | 137,06 |
| Antioquia | Hispania             | 0,00 | 0,00   | 0,00   | 41,28  | 268,10 | 288,42 | 452,77 | 246,71 | 349,15  | 266,72 |
| Antioquia | Itagui               | 0,00 | 78,56  | 74,32  | 44,42  | 85,37  | 102,89 | 140,64 | 159,00 | 185,92  | 170,17 |
| Antioquia | Ituango              | 0,00 | 67,28  | 77,05  | 47,93  | 62,12  | 94,82  | 96,52  | 126,33 | 100,02  | 121,19 |
| Antioquia | Jardín               | 0,00 | 84,35  | 84,64  | 148,86 | 142,42 | 186,10 | 309,35 | 274,69 | 429,15  | 329,12 |
| Antioquia | Jericó               | 0,00 | 214,17 | 191,46 | 152,41 | 161,37 | 243,43 | 253,08 | 410,78 | 446,17  | 582,56 |
| Antioquia | La Ceja              | 0,00 | 136,84 | 8,18   | 6,06   | 253,23 | 291,31 | 322,67 | 337,88 | 288,30  | 301,72 |
| Antioquia | La Estrella          | 0,00 | 77,48  | 49,58  | 26,11  | 56,49  | 178,45 | 202,03 | 223,25 | 261,44  | 247,89 |
| Antioquia | La Pintada           | 0,00 | 274,53 | 203,84 | 87,96  | 368,95 | 312,50 | 435,11 | 695,92 | 335,47  | 215,15 |
| Antioquia | La Unión             | 0,00 | 152,86 | 97,64  | 96,96  | 149,93 | 212,85 | 248,61 | 268,28 | 177,83  | 358,83 |
| Antioquia | Liborina             | 0,00 | 0,00   | 0,00   | 0,00   | 31,58  | 84,15  | 52,55  | 63,00  | 20,98   | 188,56 |
| Antioquia | Maceo                | 0,00 | 242,49 | 149,82 | 151,43 | 222,87 | 168,97 | 242,13 | 259,48 | 218,82  | 265,68 |

|           |                        |       |        |        |        |        |        |        |        |        |        |
|-----------|------------------------|-------|--------|--------|--------|--------|--------|--------|--------|--------|--------|
| Antioquia | Marinilla              | 2,13  | 6,28   | 123,49 | 76,98  | 155,50 | 176,63 | 189,31 | 157,92 | 153,63 | 225,15 |
| Antioquia | Medellín               | 0,04  | 37,58  | 48,81  | 28,60  | 74,78  | 124,19 | 142,80 | 148,95 | 146,04 | 207,34 |
| Antioquia | Montebello             | 0,00  | 0,00   | 0,00   | 131,43 | 89,34  | 91,21  | 31,01  | 47,44  | 80,68  | 32,91  |
| Antioquia | Murindó                | 0,00  | 0,00   | 0,00   | 0,00   | 0,00   | 23,17  | 22,72  | 44,52  | 43,54  | 0,00   |
| Antioquia | Mutatá                 | 0,00  | 5,67   | 0,00   | 37,97  | 116,67 | 202,24 | 111,60 | 158,68 | 92,18  | 208,76 |
| Antioquia | Nariño                 | 18,88 | 93,48  | 141,89 | 24,42  | 66,45  | 53,80  | 94,60  | 128,66 | 150,37 | 114,38 |
| Antioquia | Nechí                  | 0,00  | 26,87  | 0,00   | 76,66  | 29,06  | 28,34  | 51,36  | 107,94 | 41,37  | 51,40  |
| Antioquia | Necoclí                | 0,00  | 98,06  | 88,03  | 87,59  | 92,47  | 119,53 | 128,31 | 93,78  | 104,23 | 157,83 |
| Antioquia | Olaya                  | 0,00  | 100,03 | 32,98  | 0,00   | 32,26  | 63,86  | 63,11  | 312,79 | 278,04 | 274,56 |
| Antioquia | Peñol                  | 0,00  | 6,18   | 49,55  | 74,49  | 105,79 | 218,48 | 412,89 | 420,41 | 446,85 | 283,95 |
| Antioquia | Peque                  | 0,00  | 0,00   | 19,71  | 19,47  | 105,66 | 94,91  | 131,22 | 148,16 | 128,15 | 72,31  |
| Antioquia | Pueblorrico            | 0,00  | 265,69 | 179,83 | 65,33  | 172,83 | 364,77 | 371,29 | 489,92 | 284,50 | 274,84 |
| Antioquia | Puerto Berrío          | 0,00  | 256,92 | 292,59 | 179,78 | 185,71 | 204,81 | 137,05 | 54,28  | 89,58  | 115,26 |
| Antioquia | Puerto Nare            | 0,00  | 138,27 | 131,14 | 112,81 | 33,49  | 99,43  | 32,81  | 102,87 | 42,89  | 5,31   |
| Antioquia | Puerto Triunfo         | 0,00  | 97,79  | 78,90  | 82,81  | 91,93  | 132,47 | 103,83 | 142,45 | 164,49 | 131,82 |
| Antioquia | Remedios               | 0,00  | 89,49  | 87,25  | 116,00 | 150,89 | 206,09 | 143,72 | 213,91 | 109,59 | 113,72 |
| Antioquia | Retiro                 | 0,00  | 85,00  | 0,00   | 27,65  | 27,35  | 329,69 | 219,11 | 385,92 | 533,81 | 440,19 |
| Antioquia | Rionegro               | 0,00  | 172,93 | 63,68  | 18,13  | 28,49  | 164,48 | 215,84 | 231,69 | 251,98 | 318,25 |
| Antioquia | Sabanalarga            | 0,00  | 24,41  | 170,90 | 109,86 | 122,09 | 24,42  | 146,50 | 24,42  | 97,67  | 134,29 |
| Antioquia | Sabaneta               | 0,00  | 83,33  | 100,98 | 8,29   | 69,39  | 106,58 | 136,79 | 230,67 | 281,53 | 310,16 |
| Antioquia | Salgar                 | 0,00  | 110,85 | 161,24 | 100,41 | 100,75 | 162,88 | 169,11 | 124,47 | 204,45 | 222,36 |
| Antioquia | San Andrés de Cuerquía | 0,00  | 0,00   | 58,04  | 14,74  | 90,00  | 76,27  | 108,54 | 236,74 | 417,60 | 261,18 |
| Antioquia | San Carlos             | 0,00  | 18,92  | 62,91  | 56,54  | 12,54  | 131,45 | 137,43 | 174,61 | 311,25 | 223,80 |
| Antioquia | San Francisco          | 0,00  | 16,53  | 50,51  | 17,13  | 122,10 | 88,89  | 72,45  | 129,15 | 206,84 | 19,15  |
| Antioquia | San Jerónimo           | 0,00  | 375,16 | 529,76 | 303,63 | 317,85 | 420,41 | 329,16 | 422,61 | 474,87 | 424,39 |
| Antioquia | San José de La Montaña | 0,00  | 221,73 | 125,87 | 31,25  | 155,09 | 123,08 | 549,28 | 241,98 | 299,76 | 118,76 |
| Antioquia | San Juan de Urabá      | 0,00  | 49,76  | 53,30  | 0,00   | 4,28   | 189,07 | 49,48  | 178,11 | 23,84  | 11,69  |

|           |                      |       |        |        |        |        |        |        |        |        |        |
|-----------|----------------------|-------|--------|--------|--------|--------|--------|--------|--------|--------|--------|
| Antioquia | San Luis             | 0,00  | 145,64 | 163,83 | 136,70 | 0,00   | 18,24  | 18,25  | 27,40  | 91,42  | 100,57 |
| Antioquia | San Pedro            | 0,00  | 0,00   | 12,58  | 0,00   | 8,08   | 3,97   | 0,00   | 65,06  | 191,79 | 255,00 |
| Antioquia | San Pedro de Uraba   | 0,00  | 60,93  | 117,51 | 49,95  | 92,46  | 75,32  | 136,43 | 122,43 | 76,73  | 85,61  |
| Antioquia | San Rafael           | 0,00  | 218,32 | 300,98 | 188,84 | 333,89 | 380,89 | 489,45 | 307,20 | 431,43 | 387,00 |
| Antioquia | San Roque            | 0,00  | 219,58 | 158,87 | 183,00 | 282,40 | 197,51 | 327,93 | 324,73 | 273,99 | 348,08 |
| Antioquia | San Vicente          | 0,00  | 111,84 | 10,78  | 0,00   | 5,52   | 5,59   | 17,00  | 17,22  | 75,59  | 277,01 |
| Antioquia | Santa Bárbara        | 0,00  | 129,48 | 147,76 | 201,18 | 92,46  | 243,84 | 250,03 | 305,71 | 298,97 | 287,45 |
| Antioquia | Santa Rosa de Osos   | 0,00  | 107,80 | 127,57 | 8,99   | 2,96   | 8,75   | 20,14  | 133,52 | 244,04 | 263,14 |
| Antioquia | Santafé de Antioquia | 4,31  | 192,69 | 191,31 | 189,97 | 280,83 | 357,96 | 351,21 | 447,29 | 297,36 | 404,47 |
| Antioquia | Santo Domingo        | 0,00  | 89,13  | 54,04  | 54,59  | 64,37  | 120,83 | 253,52 | 218,53 | 182,41 | 252,62 |
| Antioquia | Segovia              | 0,00  | 81,86  | 32,30  | 63,75  | 107,46 | 82,77  | 140,44 | 85,72  | 52,27  | 34,41  |
| Antioquia | Sonson               | 0,00  | 137,60 | 144,18 | 145,49 | 144,10 | 145,42 | 199,42 | 254,55 | 231,61 | 216,80 |
| Antioquia | Sopetrán             | 0,00  | 86,86  | 186,49 | 99,52  | 169,10 | 174,50 | 269,84 | 329,29 | 306,21 | 384,59 |
| Antioquia | Támesis              | 0,00  | 352,71 | 318,19 | 244,33 | 409,44 | 413,98 | 371,90 | 376,14 | 380,12 | 315,96 |
| Antioquia | Tarazá               | 0,00  | 17,06  | 58,08  | 61,91  | 44,51  | 117,18 | 7,43   | 2,41   | 0,00   | 11,40  |
| Antioquia | Tarso                | 0,00  | 95,97  | 353,79 | 107,98 | 307,77 | 185,63 | 262,61 | 480,89 | 282,92 | 178,05 |
| Antioquia | Titiribí             | 0,00  | 168,52 | 94,46  | 86,49  | 85,84  | 170,31 | 169,03 | 174,89 | 125,06 | 131,09 |
| Antioquia | Toledo               | 34,46 | 136,38 | 67,41  | 83,28  | 32,93  | 0,00   | 64,31  | 111,16 | 125,51 | 139,19 |
| Antioquia | Turbo                | 0,00  | 49,85  | 48,54  | 67,32  | 58,58  | 40,07  | 76,08  | 98,60  | 50,86  | 66,66  |
| Antioquia | Uramita              | 0,00  | 0,00   | 0,00   | 60,42  | 108,85 | 84,74  | 109,05 | 109,14 | 48,56  | 0,00   |
| Antioquia | Urrao                | 0,00  | 86,30  | 80,27  | 52,77  | 115,95 | 158,70 | 142,74 | 106,71 | 127,67 | 159,06 |
| Antioquia | Valdivia             | 0,00  | 80,61  | 125,81 | 102,27 | 164,55 | 121,57 | 47,41  | 87,86  | 36,07  | 65,92  |
| Antioquia | Valparaíso           | 0,00  | 254,01 | 254,61 | 351,33 | 352,23 | 481,77 | 386,54 | 371,45 | 437,32 | 130,04 |
| Antioquia | Vegachí              | 0,00  | 9,35   | 28,52  | 58,08  | 68,99  | 110,38 | 255,47 | 249,61 | 190,52 | 215,68 |
| Antioquia | Venecia              | 0,00  | 470,85 | 276,84 | 337,10 | 457,55 | 262,88 | 218,13 | 195,86 | 143,36 | 241,86 |
| Antioquia | Vigía del Fuerte     | 0,00  | 0,00   | 0,00   | 0,00   | 0,00   | 0,00   | 0,00   | 0,00   | 17,90  | 17,90  |
| Antioquia | Yalí                 | 0,00  | 0,00   | 25,27  | 12,54  | 186,73 | 111,14 | 232,64 | 230,58 | 228,42 | 202,38 |

|            |                  |        |        |        |        |        |        |        |        |        |        |
|------------|------------------|--------|--------|--------|--------|--------|--------|--------|--------|--------|--------|
| Antioquia  | Yarumal          | 0,00   | 130,41 | 117,27 | 108,96 | 121,02 | 194,79 | 98,38  | 75,59  | 81,08  | 200,27 |
| Antioquia  | Yolombó          | 0,00   | 94,54  | 78,92  | 59,26  | 103,00 | 114,39 | 168,52 | 161,32 | 212,87 | 106,63 |
| Antioquia  | Yondó            | 0,00   | 118,01 | 127,72 | 172,74 | 221,54 | 137,12 | 139,92 | 109,66 | 26,86  | 84,25  |
| Antioquia  | Zaragoza         | 0,00   | 124,56 | 98,32  | 114,40 | 191,60 | 91,17  | 123,38 | 141,61 | 58,56  | 73,89  |
| Arauca     | Arauca           | 155,93 | 11,31  | 1,24   | 4,87   | 157,01 | 208,93 | 210,48 | 260,20 | 218,13 | 172,78 |
| Arauca     | Araucuita        | 61,02  | 18,35  | 0,00   | 10,24  | 93,62  | 85,03  | 116,24 | 244,67 | 208,19 | 191,65 |
| Arauca     | Cravo Norte      | 139,20 | 28,07  | 0,00   | 143,14 | 259,97 | 320,89 | 442,48 | 178,52 | 330,23 | 425,14 |
| Arauca     | Fortul           | 115,36 | 8,74   | 0,00   | 25,43  | 137,76 | 209,81 | 178,40 | 211,80 | 204,89 | 163,14 |
| Arauca     | Puerto Rondón    | 305,19 | 127,62 | 0,00   | 77,06  | 180,32 | 284,16 | 440,30 | 415,37 | 338,19 | 469,12 |
| Arauca     | Saravena         | 203,49 | 0,00   | 2,24   | 57,61  | 234,74 | 358,65 | 249,87 | 284,05 | 258,46 | 325,67 |
| Arauca     | Tame             | 137,77 | 14,24  | 2,01   | 35,85  | 246,40 | 407,79 | 328,43 | 290,78 | 263,42 | 298,50 |
| San Andrés | Providencia      | 1,40   | 2,77   | 8,25   | 4,09   | 9,47   | 119,40 | 272,73 | 275,72 | 329,66 | 378,72 |
| Atlántico  | Baranoa          | 0,00   | 0,00   | 14,78  | 3,65   | 10,83  | 33,91  | 222,45 | 251,56 | 292,17 | 246,47 |
| Atlántico  | Barranquilla     | 0,69   | 5,72   | 67,69  | 77,38  | 60,49  | 81,30  | 147,23 | 157,39 | 161,84 | 157,57 |
| Atlántico  | Campo de La Cruz | 5,42   | 5,52   | 0,00   | 5,71   | 5,81   | 124,18 | 264,77 | 367,53 | 299,25 | 260,23 |
| Atlántico  | Candelaria       | 16,47  | 49,20  | 8,16   | 48,82  | 8,11   | 282,87 | 265,85 | 369,63 | 272,57 | 391,81 |
| Atlántico  | Galapa           | 0,00   | 5,71   | 13,86  | 5,39   | 7,85   | 106,87 | 249,88 | 329,68 | 220,04 | 218,70 |
| Atlántico  | Juan de Acosta   | 139,93 | 45,98  | 6,47   | 19,14  | 6,29   | 105,39 | 110,04 | 108,56 | 166,61 | 223,12 |
| Atlántico  | Luruaco          | 0,00   | 0,00   | 0,00   | 7,94   | 3,92   | 104,40 | 221,32 | 339,09 | 357,06 | 323,15 |
| Atlántico  | Malambo          | 1,90   | 5,59   | 3,66   | 7,19   | 17,66  | 39,04  | 77,59  | 167,66 | 192,12 | 159,82 |
| Atlántico  | Manatí           | 0,00   | 0,00   | 6,87   | 6,78   | 6,69   | 145,30 | 293,39 | 321,90 | 171,72 | 169,67 |
| Atlántico  | Palmar de Varela | 0,00   | 20,66  | 8,20   | 20,37  | 20,23  | 108,56 | 227,66 | 345,35 | 390,72 | 368,86 |
| Atlántico  | Piojó            | 0,00   | 39,58  | 0,00   | 0,00   | 0,00   | 39,18  | 234,74 | 195,05 | 389,56 | 194,17 |
| Atlántico  | Polonuevo        | 0,00   | 0,00   | 6,91   | 6,84   | 6,78   | 228,36 | 299,64 | 488,26 | 333,70 | 344,00 |
| Atlántico  | Ponedera         | 0,00   | 5,02   | 9,87   | 9,71   | 4,78   | 79,99  | 333,58 | 342,28 | 332,63 | 256,85 |
| Atlántico  | Puerto Colombia  | 0,00   | 14,44  | 28,96  | 25,41  | 40,04  | 36,51  | 380,83 | 459,29 | 439,07 | 670,64 |
| Atlántico  | Repelón          | 0,00   | 0,00   | 0,00   | 8,19   | 0,00   | 87,71  | 251,77 | 182,46 | 226,06 | 272,32 |

|              |                      |        |        |        |        |        |        |        |        |        |        |
|--------------|----------------------|--------|--------|--------|--------|--------|--------|--------|--------|--------|--------|
| Atlántico    | Sabanagrande         | 0,00   | 7,36   | 3,60   | 17,59  | 13,77  | 20,20  | 355,71 | 396,66 | 306,21 | 228,88 |
| Atlántico    | Sabanalarga          | 1,12   | 16,63  | 9,85   | 8,65   | 5,34   | 59,05  | 160,47 | 142,16 | 95,75  | 109,83 |
| Atlántico    | Santa Lucía          | 0,00   | 32,76  | 8,24   | 16,60  | 0,00   | 126,40 | 407,54 | 436,53 | 250,35 | 443,79 |
| Atlántico    | Santo Tomás          | 0,00   | 0,00   | 0,00   | 4,06   | 20,17  | 236,62 | 291,22 | 420,67 | 335,62 | 322,21 |
| Atlántico    | Soledad              | 0,81   | 6,53   | 9,22   | 10,08  | 10,89  | 39,87  | 123,72 | 121,20 | 95,86  | 101,39 |
| Atlántico    | Suan                 | 0,00   | 10,61  | 0,00   | 43,29  | 21,86  | 110,41 | 346,21 | 564,46 | 479,89 | 519,39 |
| Atlántico    | Tubará               | 54,88  | 45,67  | 9,12   | 18,21  | 36,39  | 209,03 | 226,98 | 190,55 | 353,90 | 471,70 |
| Atlántico    | Usiacurí             | 0,00   | 0,00   | 11,04  | 0,00   | 10,90  | 0,00   | 279,81 | 407,16 | 351,44 | 328,60 |
| Bogotá, D.C. | Bogotá D.C.          | 76,64  | 47,94  | 38,06  | 41,17  | 63,77  | 117,57 | 190,90 | 222,93 | 220,59 | 240,50 |
| Bolívar      | Achí                 | 93,65  | 160,31 | 4,79   | 51,86  | 217,97 | 269,25 | 193,01 | 123,53 | 104,12 | 68,23  |
| Bolívar      | Altos del Rosario    | 67,99  | 83,46  | 0,00   | 0,00   | 86,87  | 92,96  | 75,99  | 119,28 | 65,84  | 35,85  |
| Bolívar      | Arenal               | 0,00   | 0,00   | 0,00   | 5,88   | 0,00   | 5,65   | 44,24  | 75,75  | 90,06  | 103,62 |
| Bolívar      | Arjona               | 190,07 | 67,47  | 4,62   | 25,72  | 157,45 | 239,13 | 22,90  | 110,99 | 186,17 | 117,74 |
| Bolívar      | Arroyohondo          | 0,00   | 11,00  | 0,00   | 0,00   | 74,26  | 94,40  | 165,70 | 81,78  | 40,38  | 89,66  |
| Bolívar      | Barranco de Loba     | 12,81  | 18,95  | 43,56  | 36,75  | 30,13  | 23,71  | 227,13 | 120,27 | 140,70 | 154,74 |
| Bolívar      | Calamar              | 0,00   | 37,39  | 87,78  | 22,84  | 31,58  | 22,29  | 96,83  | 65,19  | 85,81  | 55,06  |
| Bolívar      | Cantagallo           | 123,93 | 36,56  | 48,00  | 11,80  | 23,19  | 102,68 | 269,09 | 198,41 | 129,88 | 191,63 |
| Bolívar      | Cartagena            | 1,10   | 10,29  | 12,64  | 10,06  | 26,89  | 21,30  | 30,45  | 54,94  | 70,58  | 83,88  |
| Bolívar      | Cicuco               | 0,00   | 0,00   | 234,81 | 261,80 | 153,33 | 288,68 | 189,10 | 378,04 | 287,82 | 341,60 |
| Bolívar      | Clemencia            | 270,66 | 0,00   | 25,04  | 0,00   | 8,23   | 179,59 | 113,45 | 458,09 | 159,49 | 316,13 |
| Bolívar      | Córdoba              | 23,26  | 15,60  | 47,06  | 0,00   | 31,68  | 7,95   | 103,78 | 72,14  | 48,25  | 24,22  |
| Bolívar      | El Carmen de Bolívar | 140,41 | 1,43   | 1,42   | 4,22   | 182,31 | 177,56 | 103,46 | 146,71 | 157,02 | 230,11 |
| Bolívar      | El Guamo             | 51,37  | 0,00   | 12,88  | 12,89  | 90,16  | 219,33 | 450,57 | 309,16 | 425,42 | 205,92 |
| Bolívar      | El Peñón             | 12,37  | 12,15  | 47,69  | 11,69  | 68,73  | 89,75  | 153,86 | 86,10  | 200,34 | 113,47 |
| Bolívar      | Hatillo de Loba      | 17,32  | 8,63   | 60,17  | 0,00   | 59,66  | 127,25 | 194,16 | 134,37 | 83,54  | 124,55 |
| Bolívar      | Magangué             | 177,66 | 86,59  | 80,70  | 100,07 | 116,96 | 142,73 | 230,00 | 296,88 | 282,86 | 259,22 |
| Bolívar      | Mahates              | 243,59 | 4,23   | 0,00   | 8,25   | 16,31  | 16,10  | 75,55  | 7,85   | 38,78  | 72,72  |

|         |                       |        |        |        |        |        |        |        |        |        |        |
|---------|-----------------------|--------|--------|--------|--------|--------|--------|--------|--------|--------|--------|
| Bolívar | Margarita             | 0,00   | 21,17  | 0,00   | 41,95  | 10,43  | 10,36  | 0,00   | 61,27  | 40,50  | 150,51 |
| Bolívar | María La Baja         | 10,94  | 106,64 | 99,58  | 23,67  | 40,62  | 67,96  | 67,50  | 29,32  | 62,40  | 51,61  |
| Bolívar | Mompós                | 107,36 | 4,75   | 82,62  | 37,54  | 90,91  | 187,56 | 308,10 | 264,81 | 213,04 | 143,95 |
| Bolívar | Montecristo           | 0,00   | 5,52   | 10,81  | 5,29   | 0,00   | 0,00   | 4,94   | 81,96  | 0,00   | 18,40  |
| Bolívar | Morales               | 26,32  | 36,40  | 20,54  | 40,57  | 10,00  | 34,52  | 19,45  | 19,16  | 9,44   | 23,25  |
| Bolívar | Norosí                | 0,00   | 0,00   | 0,00   | 0,00   | 18,77  | 0,00   | 0,00   | 57,30  | 19,22  | 38,63  |
| Bolívar | Pinillos              | 4,32   | 0,00   | 34,02  | 12,65  | 41,77  | 16,54  | 28,66  | 20,27  | 0,00   | 7,94   |
| Bolívar | Regidor               | 10,98  | 32,38  | 0,00   | 20,85  | 10,24  | 0,00   | 39,57  | 19,41  | 66,74  | 9,36   |
| Bolívar | Río Viejo             | 4,67   | 12,34  | 12,16  | 5,99   | 58,91  | 46,40  | 39,97  | 16,86  | 27,66  | 0,00   |
| Bolívar | San Cristóbal         | 15,24  | 0,00   | 0,00   | 0,00   | 0,00   | 90,59  | 391,39 | 736,51 | 554,81 | 627,43 |
| Bolívar | San Estanislao        | 6,48   | 0,00   | 0,00   | 12,72  | 18,96  | 31,38  | 105,94 | 92,89  | 98,42  | 85,53  |
| Bolívar | San Fernando          | 68,78  | 0,00   | 0,00   | 0,00   | 37,36  | 14,85  | 51,64  | 109,83 | 50,90  | 14,44  |
| Bolívar | San Jacinto           | 0,00   | 0,00   | 60,58  | 0,00   | 46,61  | 121,10 | 32,56  | 120,82 | 232,17 | 366,25 |
| Bolívar | San Jacinto del Cauca | 0,00   | 0,00   | 16,91  | 0,00   | 32,44  | 15,89  | 70,00  | 68,49  | 37,24  | 65,58  |
| Bolívar | San Juan Nepomuceno   | 0,00   | 15,27  | 21,32  | 3,04   | 33,31  | 190,21 | 529,63 | 422,84 | 239,05 | 223,06 |
| Bolívar | San Martín de Loba    | 204,04 | 80,21  | 65,57  | 25,73  | 157,60 | 141,95 | 169,08 | 200,95 | 190,81 | 146,98 |
| Bolívar | San Pablo             | 0,00   | 17,44  | 0,00   | 0,00   | 42,57  | 153,86 | 128,62 | 168,87 | 90,11  | 170,42 |
| Bolívar | Santa Catalina        | 171,75 | 0,00   | 0,00   | 0,00   | 0,00   | 0,00   | 309,38 | 306,72 | 250,59 | 255,68 |
| Bolívar | Santa Rosa            | 47,38  | 25,78  | 25,23  | 14,82  | 275,55 | 397,31 | 629,11 | 561,21 | 424,93 | 441,46 |
| Bolívar | Santa Rosa del Sur    | 0,00   | 0,00   | 0,00   | 0,00   | 116,87 | 132,16 | 199,00 | 146,02 | 102,37 | 253,72 |
| Bolívar | Simití                | 0,00   | 21,34  | 0,00   | 20,97  | 67,47  | 133,42 | 60,83  | 220,13 | 64,13  | 92,34  |
| Bolívar | Soplaviento           | 108,41 | 0,00   | 24,00  | 107,89 | 11,96  | 0,00   | 59,52  | 225,57 | 94,78  | 11,81  |
| Bolívar | Talagua Nuevo         | 35,92  | 71,76  | 313,42 | 339,59 | 196,08 | 133,33 | 274,87 | 318,08 | 281,94 | 201,98 |
| Bolívar | Tiquisio              | 15,53  | 20,41  | 50,30  | 4,95   | 97,45  | 19,16  | 51,78  | 50,85  | 31,76  | 31,15  |
| Bolívar | Turbaco               | 174,60 | 102,17 | 25,58  | 98,00  | 231,40 | 148,78 | 162,42 | 101,16 | 157,96 | 102,49 |
| Bolívar | Turbaná               | 21,85  | 0,00   | 0,00   | 0,00   | 42,01  | 131,62 | 192,10 | 47,51  | 161,26 | 206,24 |
| Bolívar | Villanueva            | 66,84  | 49,58  | 5,44   | 10,77  | 202,34 | 494,48 | 317,15 | 668,11 | 584,02 | 371,43 |



|         |              |        |       |        |        |        |        |        |        |        |        |
|---------|--------------|--------|-------|--------|--------|--------|--------|--------|--------|--------|--------|
| Bolívar | Zambrano     | 0,00   | 0,00  | 26,77  | 124,34 | 132,50 | 131,78 | 322,89 | 321,04 | 111,96 | 136,89 |
| Boyacá  | Almeida      | 0,00   | 47,24 | 48,40  | 148,88 | 358,61 | 367,07 | 540,54 | 554,94 | 285,06 | 117,72 |
| Boyacá  | Aquitania    | 24,41  | 0,00  | 18,58  | 93,64  | 214,11 | 279,67 | 269,63 | 557,97 | 590,51 | 723,77 |
| Boyacá  | Arcabuco     | 0,00   | 0,00  | 0,00   | 0,00   | 401,84 | 305,93 | 114,64 | 267,33 | 438,93 | 514,97 |
| Boyacá  | Belén        | 11,51  | 11,74 | 11,96  | 0,00   | 12,44  | 228,54 | 401,66 | 608,30 | 337,84 | 523,78 |
| Boyacá  | Berbeo       | 0,00   | 0,00  | 104,17 | 156,09 | 155,93 | 207,68 | 363,07 | 103,63 | 414,08 | 258,53 |
| Boyacá  | Betéitiva    | 0,00   | 0,00  | 86,10  | 0,00   | 89,25  | 136,43 | 92,76  | 94,65  | 193,33 | 296,44 |
| Boyacá  | Boavita      | 47,41  | 12,12 | 24,73  | 227,27 | 348,30 | 448,25 | 256,41 | 289,78 | 437,91 | 404,98 |
| Boyacá  | Boyacá       | 161,36 | 81,83 | 41,39  | 62,81  | 361,70 | 386,51 | 457,52 | 685,54 | 581,40 | 362,48 |
| Boyacá  | Briceño      | 36,79  | 36,97 | 37,22  | 74,68  | 37,66  | 75,73  | 152,79 | 115,12 | 77,40  | 77,88  |
| Boyacá  | Buenavista   | 0,00   | 0,00  | 0,00   | 0,00   | 171,41 | 446,51 | 344,12 | 275,81 | 259,11 | 415,44 |
| Boyacá  | Busbanzá     | 322,23 | 0,00  | 0,00   | 0,00   | 0,00   | 93,98  | 273,97 | 177,46 | 173,01 | 419,46 |
| Boyacá  | Caldas       | 0,00   | 25,43 | 25,68  | 233,34 | 26,27  | 106,10 | 375,94 | 217,45 | 384,83 | 361,51 |
| Boyacá  | Campohermoso | 0,00   | 0,00  | 175,75 | 126,17 | 177,57 | 229,77 | 154,44 | 103,33 | 155,97 | 209,81 |
| Boyacá  | Cerinza      | 0,00   | 0,00  | 0,00   | 0,00   | 351,14 | 178,03 | 309,04 | 365,82 | 345,56 | 430,80 |
| Boyacá  | Chinavita    | 0,00   | 27,09 | 54,47  | 54,76  | 247,93 | 443,70 | 474,60 | 337,46 | 425,17 | 400,11 |
| Boyacá  | Chiquinquirá | 10,39  | 13,63 | 60,35  | 67,67  | 141,42 | 180,94 | 236,66 | 216,09 | 231,33 | 231,11 |
| Boyacá  | Chíquiza     | 0,00   | 16,95 | 0,00   | 190,28 | 122,33 | 159,04 | 214,25 | 198,38 | 164,11 | 128,84 |
| Boyacá  | Chiscas      | 0,00   | 0,00  | 0,00   | 373,06 | 381,28 | 173,76 | 221,93 | 272,60 | 209,74 | 261,90 |
| Boyacá  | Chita        | 0,00   | 19,15 | 0,00   | 0,00   | 268,71 | 554,60 | 408,75 | 320,74 | 303,92 | 180,72 |
| Boyacá  | Chitaraque   | 0,00   | 31,30 | 31,78  | 177,76 | 262,77 | 283,76 | 407,61 | 466,24 | 404,43 | 464,62 |
| Boyacá  | Chivatá      | 37,94  | 55,72 | 54,61  | 196,15 | 227,27 | 188,32 | 268,77 | 131,56 | 80,66  | 95,01  |
| Boyacá  | Chivor       | 0,00   | 47,57 | 0,00   | 0,00   | 305,97 | 52,22  | 53,39  | 271,59 | 278,55 | 114,16 |
| Boyacá  | Ciénega      | 0,00   | 0,00  | 59,14  | 0,00   | 20,10  | 40,62  | 20,53  | 249,32 | 378,63 | 340,86 |
| Boyacá  | Cómbita      | 0,00   | 0,00  | 36,75  | 21,80  | 172,22 | 212,80 | 189,12 | 249,26 | 280,21 | 276,80 |
| Boyacá  | Coper        | 0,00   | 0,00  | 0,00   | 25,41  | 334,53 | 235,36 | 423,28 | 402,90 | 273,00 | 277,01 |
| Boyacá  | Corrales     | 0,00   | 0,00  | 0,00   | 83,02  | 294,12 | 680,85 | 300,43 | 390,46 | 307,96 | 266,55 |

|        |                |        |       |        |        |        |        |        |        |        |        |
|--------|----------------|--------|-------|--------|--------|--------|--------|--------|--------|--------|--------|
| Boyacá | Covarachía     | 31,05  | 0,00  | 0,00   | 64,85  | 229,96 | 433,04 | 406,50 | 68,63  | 454,39 | 566,37 |
| Boyacá | Cubará         | 45,15  | 0,00  | 284,86 | 44,90  | 29,89  | 29,84  | 89,42  | 193,51 | 163,57 | 29,72  |
| Boyacá | Cucaita        | 0,00   | 0,00  | 0,00   | 86,15  | 172,08 | 300,56 | 214,36 | 192,64 | 234,69 | 298,70 |
| Boyacá | Cuítiva        | 150,38 | 0,00  | 0,00   | 661,24 | 460,36 | 874,49 | 310,56 | 208,44 | 262,33 | 369,98 |
| Boyacá | Duitama        | 4,60   | 29,26 | 46,40  | 66,11  | 239,83 | 302,60 | 322,89 | 367,95 | 448,12 | 447,37 |
| Boyacá | El Cocuy       | 0,00   | 0,00  | 18,35  | 92,34  | 241,46 | 224,51 | 244,87 | 170,58 | 190,80 | 288,63 |
| Boyacá | El Espino      | 0,00   | 0,00  | 0,00   | 121,45 | 314,31 | 216,71 | 215,88 | 71,72  | 214,54 | 428,06 |
| Boyacá | Firavitoba     | 0,00   | 16,14 | 0,00   | 81,71  | 115,34 | 231,98 | 250,17 | 369,75 | 220,08 | 494,54 |
| Boyacá | Floresta       | 0,00   | 0,00  | 21,01  | 21,17  | 213,36 | 279,63 | 303,82 | 459,82 | 198,98 | 223,31 |
| Boyacá | Gachantivá     | 133,78 | 0,00  | 0,00   | 34,75  | 141,44 | 323,51 | 656,22 | 629,16 | 866,62 | 764,23 |
| Boyacá | Gameza         | 54,57  | 0,00  | 0,00   | 75,97  | 328,06 | 255,15 | 657,50 | 425,19 | 267,71 | 418,76 |
| Boyacá | Garagoa        | 24,04  | 5,99  | 23,90  | 17,88  | 249,67 | 100,86 | 284,36 | 337,08 | 295,09 | 347,59 |
| Boyacá | Guacamayas     | 0,00   | 0,00  | 102,72 | 0,00   | 698,92 | 606,06 | 282,33 | 287,85 | 59,07  | 301,75 |
| Boyacá | Guateque       | 19,86  | 0,00  | 0,00   | 40,34  | 40,56  | 418,62 | 493,52 | 382,35 | 551,91 | 628,14 |
| Boyacá | Guayatá        | 0,00   | 0,00  | 0,00   | 69,67  | 320,74 | 528,23 | 297,90 | 419,29 | 253,61 | 259,33 |
| Boyacá | Güicán         | 0,00   | 0,00  | 13,32  | 53,94  | 164,14 | 138,66 | 42,19  | 57,04  | 28,95  | 147,04 |
| Boyacá | Iza            | 0,00   | 45,72 | 0,00   | 224,22 | 222,12 | 87,68  | 607,38 | 172,04 | 425,71 | 126,42 |
| Boyacá | Jenesano       | 13,37  | 13,32 | 53,10  | 105,86 | 237,84 | 224,07 | 302,15 | 341,03 | 196,34 | 470,04 |
| Boyacá | Jericó         | 0,00   | 0,00  | 90,09  | 0,00   | 93,17  | 165,76 | 192,22 | 122,22 | 149,63 | 227,50 |
| Boyacá | La Capilla     | 0,00   | 0,00  | 0,00   | 70,50  | 252,25 | 441,99 | 263,36 | 461,01 | 235,29 | 320,13 |
| Boyacá | La Uvita       | 89,05  | 30,71 | 31,86  | 32,93  | 102,60 | 141,64 | 257,45 | 343,64 | 554,89 | 246,41 |
| Boyacá | La Victoria    | 0,00   | 0,00  | 0,00   | 0,00   | 238,95 | 59,74  | 179,21 | 119,47 | 238,95 | 298,69 |
| Boyacá | Labranzagrande | 0,00   | 56,78 | 38,02  | 210,04 | 115,12 | 96,41  | 96,94  | 77,99  | 156,89 | 0,00   |
| Boyacá | Macanal        | 0,00   | 0,00  | 0,00   | 167,57 | 208,99 | 271,06 | 291,36 | 394,76 | 331,88 | 352,19 |
| Boyacá | Maripí         | 63,76  | 0,00  | 12,89  | 12,98  | 52,20  | 52,57  | 145,44 | 132,96 | 213,90 | 228,99 |
| Boyacá | Miraflores     | 20,63  | 0,00  | 0,00   | 10,27  | 10,27  | 318,14 | 338,39 | 337,94 | 368,21 | 388,59 |
| Boyacá | Mongua         | 0,00   | 0,00  | 0,00   | 40,05  | 303,89 | 122,72 | 248,34 | 293,26 | 84,80  | 171,78 |

|        |               |       |       |        |        |        |        |        |        |        |        |
|--------|---------------|-------|-------|--------|--------|--------|--------|--------|--------|--------|--------|
| Boyacá | Monguí        | 0,00  | 0,00  | 40,04  | 0,00   | 160,26 | 200,40 | 300,66 | 501,20 | 220,62 | 521,56 |
| Boyacá | Moniquirá     | 32,13 | 0,00  | 36,84  | 198,44 | 513,39 | 519,31 | 557,83 | 573,19 | 406,50 | 576,25 |
| Boyacá | Motavita      | 28,44 | 0,00  | 27,46  | 161,97 | 159,15 | 208,58 | 141,08 | 327,74 | 173,55 | 244,05 |
| Boyacá | Muzo          | 0,00  | 0,00  | 183,77 | 155,15 | 251,65 | 212,34 | 118,50 | 207,51 | 254,42 | 358,99 |
| Boyacá | Nobsa         | 38,81 | 12,84 | 6,37   | 82,33  | 270,42 | 412,45 | 466,33 | 457,38 | 546,99 | 513,67 |
| Boyacá | Nuevo Colón   | 48,52 | 16,04 | 0,00   | 157,65 | 297,71 | 233,06 | 200,93 | 353,14 | 335,42 | 212,06 |
| Boyacá | Oicatá        | 0,00  | 0,00  | 70,70  | 211,71 | 423,73 | 353,23 | 776,29 | 353,11 | 635,14 | 353,23 |
| Boyacá | Otanche       | 0,00  | 0,00  | 9,47   | 103,96 | 179,26 | 178,96 | 253,93 | 244,20 | 168,86 | 140,57 |
| Boyacá | Pachavita     | 0,00  | 0,00  | 69,93  | 356,76 | 402,64 | 224,30 | 342,99 | 507,61 | 598,09 | 285,36 |
| Boyacá | Páez          | 0,00  | 0,00  | 31,41  | 127,06 | 290,70 | 393,06 | 266,13 | 168,58 | 411,95 | 209,28 |
| Boyacá | Paipa         | 0,00  | 17,41 | 17,23  | 54,57  | 141,86 | 478,42 | 497,08 | 640,33 | 627,85 | 496,44 |
| Boyacá | Pajarito      | 88,73 | 0,00  | 0,00   | 49,00  | 0,00   | 316,12 | 380,43 | 337,84 | 116,35 | 239,52 |
| Boyacá | Panqueba      | 0,00  | 57,64 | 58,89  | 0,00   | 369,69 | 251,41 | 127,96 | 328,73 | 538,00 | 137,74 |
| Boyacá | Pauna         | 28,67 | 0,00  | 0,00   | 47,10  | 168,89 | 168,30 | 195,77 | 213,85 | 167,01 | 138,93 |
| Boyacá | Paya          | 0,00  | 0,00  | 114,68 | 0,00   | 0,00   | 116,01 | 233,01 | 351,15 | 156,86 | 39,42  |
| Boyacá | Paz de Río    | 0,00  | 19,62 | 0,00   | 100,48 | 630,34 | 432,28 | 396,16 | 486,05 | 405,98 | 324,82 |
| Boyacá | Pesca         | 31,93 | 0,00  | 0,00   | 168,80 | 378,66 | 304,34 | 406,26 | 426,67 | 286,35 | 356,14 |
| Boyacá | Pisba         | 0,00  | 0,00  | 0,00   | 0,00   | 281,89 | 71,68  | 72,25  | 146,63 | 297,62 | 226,76 |
| Boyacá | Puerto Boyacá | 1,94  | 0,00  | 3,81   | 5,66   | 114,06 | 194,68 | 202,24 | 182,36 | 204,39 | 201,10 |
| Boyacá | Quípama       | 0,00  | 0,00  | 0,00   | 0,00   | 36,30  | 85,72  | 123,85 | 87,88  | 139,70 | 205,76 |
| Boyacá | Ramiriquí     | 75,15 | 37,84 | 295,35 | 172,70 | 164,46 | 273,04 | 216,15 | 455,58 | 409,39 | 302,24 |
| Boyacá | Ráquira       | 15,67 | 0,00  | 84,69  | 61,10  | 151,66 | 165,60 | 149,51 | 237,42 | 242,86 | 197,34 |
| Boyacá | Rondón        | 0,00  | 0,00  | 0,00   | 0,00   | 34,54  | 104,24 | 104,90 | 105,60 | 354,36 | 286,12 |
| Boyacá | Saboyá        | 15,56 | 0,00  | 15,70  | 63,05  | 166,26 | 175,10 | 104,02 | 313,56 | 210,15 | 308,72 |
| Boyacá | Sáchica       | 0,00  | 0,00  | 52,04  | 26,08  | 365,82 | 471,33 | 524,93 | 710,34 | 633,08 | 687,83 |
| Boyacá | Samacá        | 0,00  | 21,80 | 10,77  | 15,96  | 68,36  | 93,56  | 421,31 | 513,19 | 442,06 | 392,72 |
| Boyacá | San Eduardo   | 0,00  | 0,00  | 156,74 | 52,47  | 368,03 | 158,48 | 265,53 | 320,86 | 590,76 | 321,37 |

|        |                       |       |        |        |        |        |        |        |        |        |        |
|--------|-----------------------|-------|--------|--------|--------|--------|--------|--------|--------|--------|--------|
| Boyacá | San José de Pare      | 35,47 | 0,00   | 36,05  | 90,91  | 458,80 | 352,18 | 112,36 | 340,84 | 459,68 | 445,91 |
| Boyacá | San Luis de Gaceno    | 16,35 | 0,00   | 0,00   | 0,00   | 106,95 | 255,52 | 279,85 | 248,33 | 253,91 | 120,10 |
| Boyacá | San Mateo             | 0,00  | 22,55  | 23,12  | 190,07 | 560,02 | 702,28 | 359,90 | 607,82 | 434,55 | 502,51 |
| Boyacá | San Miguel de Sema    | 0,00  | 0,00   | 65,30  | 65,37  | 65,46  | 131,09 | 218,82 | 175,32 | 263,39 | 395,78 |
| Boyacá | San Pablo de Borbur   | 0,00  | 0,00   | 0,00   | 83,73  | 112,07 | 150,05 | 75,31  | 37,86  | 38,01  | 76,35  |
| Boyacá | Santa María           | 0,00  | 0,00   | 0,00   | 69,69  | 212,41 | 359,88 | 97,44  | 247,40 | 226,13 | 944,36 |
| Boyacá | Santa Rosa de Viterbo | 15,02 | 0,00   | 89,80  | 22,42  | 358,64 | 321,09 | 209,06 | 335,85 | 462,58 | 328,19 |
| Boyacá | Santa Sofía           | 0,00  | 0,00   | 0,00   | 206,26 | 243,73 | 777,93 | 286,74 | 546,45 | 147,93 | 338,60 |
| Boyacá | Santana               | 0,00  | 12,80  | 64,12  | 12,85  | 373,42 | 438,77 | 672,62 | 427,90 | 520,02 | 365,01 |
| Boyacá | Sativanorte           | 0,00  | 0,00   | 0,00   | 0,00   | 397,93 | 365,41 | 124,07 | 251,05 | 384,78 | 260,19 |
| Boyacá | Sativasur             | 0,00  | 0,00   | 0,00   | 325,20 | 334,45 | 422,30 | 173,01 | 264,78 | 270,27 | 91,41  |
| Boyacá | Siachoque             | 22,44 | 11,21  | 0,00   | 11,19  | 178,89 | 89,39  | 323,81 | 357,14 | 290,05 | 200,74 |
| Boyacá | Soatá                 | 33,83 | 0,00   | 47,41  | 230,55 | 572,78 | 510,59 | 484,42 | 510,34 | 634,05 | 707,31 |
| Boyacá | Socha                 | 79,95 | 0,00   | 40,37  | 27,09  | 286,03 | 274,09 | 386,69 | 319,71 | 70,03  | 366,61 |
| Boyacá | Socotá                | 0,00  | 0,00   | 0,00   | 10,88  | 89,33  | 239,81 | 210,75 | 96,00  | 98,43  | 327,70 |
| Boyacá | Sogamoso              | 3,43  | 103,19 | 70,73  | 281,23 | 352,63 | 499,67 | 478,93 | 505,46 | 504,88 | 614,42 |
| Boyacá | Somondoco             | 0,00  | 0,00   | 0,00   | 0,00   | 0,00   | 233,28 | 371,75 | 567,11 | 247,80 | 815,75 |
| Boyacá | Sora                  | 0,00  | 0,00   | 0,00   | 133,02 | 132,85 | 99,47  | 198,74 | 132,36 | 363,64 | 396,43 |
| Boyacá | Soracá                | 0,00  | 34,67  | 17,50  | 17,73  | 178,89 | 343,64 | 146,36 | 593,14 | 579,11 | 492,52 |
| Boyacá | Sotaquirá             | 11,47 | 11,63  | 0,00   | 0,00   | 133,80 | 259,58 | 163,23 | 306,40 | 168,63 | 184,75 |
| Boyacá | Susacón               | 0,00  | 0,00   | 116,11 | 206,49 | 300,03 | 398,04 | 217,80 | 349,87 | 96,93  | 132,14 |
| Boyacá | Sutamarchán           | 0,00  | 0,00   | 0,00   | 49,73  | 232,87 | 217,03 | 318,47 | 302,93 | 185,94 | 373,51 |
| Boyacá | Sutatenza             | 0,00  | 0,00   | 45,81  | 46,20  | 23,42  | 236,80 | 359,28 | 411,92 | 220,26 | 396,73 |
| Boyacá | Tasco                 | 0,00  | 14,78  | 29,81  | 195,28 | 302,98 | 244,57 | 216,12 | 389,23 | 314,42 | 412,96 |
| Boyacá | Tenza                 | 0,00  | 0,00   | 0,00   | 45,49  | 299,40 | 373,31 | 236,52 | 550,50 | 316,15 | 394,87 |
| Boyacá | Tibaná                | 20,78 | 0,00   | 231,09 | 211,35 | 329,47 | 406,16 | 236,69 | 291,96 | 555,19 | 372,15 |
| Boyacá | Tibasosa              | 38,64 | 7,64   | 0,00   | 14,95  | 118,26 | 322,06 | 420,44 | 365,96 | 284,43 | 415,61 |

|        |                |        |        |        |        |        |        |        |        |        |        |
|--------|----------------|--------|--------|--------|--------|--------|--------|--------|--------|--------|--------|
| Boyacá | Tinjacá        | 0,00   | 0,00   | 33,44  | 166,67 | 265,87 | 397,75 | 462,96 | 396,04 | 461,29 | 526,49 |
| Boyacá | Tipacoque      | 0,00   | 0,00   | 0,00   | 56,66  | 202,20 | 234,67 | 508,98 | 335,06 | 374,30 | 348,10 |
| Boyacá | Toca           | 9,52   | 0,00   | 9,59   | 0,00   | 28,99  | 29,13  | 146,20 | 147,02 | 226,44 | 277,06 |
| Boyacá | Togüí          | 0,00   | 0,00   | 0,00   | 58,64  | 275,10 | 335,90 | 159,05 | 500,10 | 362,46 | 202,80 |
| Boyacá | Tópaga         | 0,00   | 27,11  | 0,00   | 108,34 | 135,39 | 406,06 | 135,35 | 351,92 | 324,85 | 730,91 |
| Boyacá | Tota           | 0,00   | 0,00   | 17,92  | 36,03  | 253,58 | 382,51 | 293,20 | 202,88 | 278,50 | 317,88 |
| Boyacá | Tunja          | 2,48   | 10,34  | 46,49  | 111,61 | 149,52 | 218,57 | 298,21 | 338,09 | 382,74 | 438,72 |
| Boyacá | Tununguá       | 59,95  | 59,21  | 0,00   | 0,00   | 0,00   | 282,33 | 55,68  | 384,62 | 271,74 | 107,47 |
| Boyacá | Turmequé       | 0,00   | 0,00   | 0,00   | 29,07  | 118,68 | 333,43 | 216,92 | 427,08 | 420,58 | 297,52 |
| Boyacá | Tuta           | 0,00   | 21,71  | 10,78  | 42,77  | 116,83 | 158,21 | 251,23 | 291,21 | 268,79 | 226,01 |
| Boyacá | Tutazá         | 0,00   | 0,00   | 0,00   | 48,45  | 196,75 | 200,30 | 254,58 | 416,23 | 423,28 | 323,62 |
| Boyacá | Umbita         | 39,29  | 0,00   | 19,53  | 97,42  | 165,31 | 213,63 | 194,02 | 242,41 | 252,08 | 164,70 |
| Boyacá | Ventaquemada   | 0,00   | 0,00   | 6,73   | 26,72  | 192,54 | 244,02 | 275,25 | 254,09 | 278,46 | 270,41 |
| Boyacá | Villa de Leyva | 23,37  | 0,00   | 0,00   | 113,27 | 665,39 | 412,59 | 896,66 | 550,58 | 631,14 | 989,17 |
| Boyacá | Viracachá      | 0,00   | 0,00   | 29,54  | 267,54 | 360,69 | 363,86 | 396,58 | 430,64 | 372,44 | 374,88 |
| Boyacá | Zetaquirá      | 0,00   | 0,00   | 0,00   | 20,62  | 41,77  | 338,84 | 341,88 | 346,77 | 307,22 | 311,87 |
| Caldas | Aguadas        | 193,00 | 194,86 | 34,21  | 4,32   | 17,43  | 233,19 | 271,07 | 183,91 | 240,03 | 205,81 |
| Caldas | Anserma        | 134,88 | 141,16 | 98,35  | 69,68  | 104,93 | 204,83 | 220,24 | 265,33 | 245,62 | 139,59 |
| Caldas | Aranzazu       | 270,96 | 209,80 | 16,32  | 16,51  | 83,54  | 228,00 | 299,20 | 354,49 | 411,49 | 407,33 |
| Caldas | Belalcázar     | 222,66 | 397,55 | 270,13 | 202,34 | 435,01 | 349,43 | 542,30 | 465,33 | 506,31 | 390,33 |
| Caldas | Chinchiná      | 145,11 | 393,37 | 362,53 | 240,05 | 409,20 | 403,10 | 427,74 | 384,94 | 452,50 | 442,67 |
| Caldas | Filadelfia     | 209,61 | 155,47 | 66,40  | 25,27  | 153,79 | 78,01  | 219,99 | 321,43 | 271,89 | 229,91 |
| Caldas | La Dorada      | 16,26  | 39,08  | 48,25  | 16,00  | 94,15  | 141,15 | 183,76 | 169,77 | 218,29 | 281,82 |
| Caldas | La Merced      | 369,97 | 204,63 | 128,33 | 294,74 | 184,07 | 221,84 | 226,52 | 177,84 | 236,02 | 185,43 |
| Caldas | Manizales      | 140,57 | 206,92 | 180,69 | 193,83 | 218,93 | 224,19 | 280,29 | 323,09 | 321,66 | 325,56 |
| Caldas | Manzanares     | 76,84  | 126,33 | 57,48  | 53,79  | 158,43 | 151,23 | 245,51 | 183,39 | 4,30   | 298,55 |
| Caldas | Marmato        | 174,48 | 265,44 | 45,84  | 170,80 | 158,23 | 134,74 | 256,47 | 188,34 | 87,95  | 251,04 |

|         |                        |        |        |        |        |        |        |        |        |        |        |
|---------|------------------------|--------|--------|--------|--------|--------|--------|--------|--------|--------|--------|
| Caldas  | Marquetalia            | 188,50 | 221,80 | 33,55  | 20,11  | 33,47  | 167,16 | 180,36 | 253,64 | 213,45 | 293,33 |
| Caldas  | Marulanda              | 0,00   | 0,00   | 57,95  | 29,04  | 58,16  | 87,49  | 0,00   | 29,33  | 117,44 | 29,45  |
| Caldas  | Neira                  | 174,51 | 131,54 | 30,90  | 68,12  | 111,53 | 107,28 | 99,83  | 181,61 | 117,98 | 240,73 |
| Caldas  | Norcasia               | 191,18 | 207,41 | 223,91 | 90,36  | 258,01 | 275,65 | 385,74 | 295,49 | 345,15 | 411,26 |
| Caldas  | Pácora                 | 117,33 | 304,27 | 210,27 | 274,64 | 235,63 | 373,74 | 366,83 | 392,03 | 435,07 | 376,94 |
| Caldas  | Palestina              | 383,16 | 228,04 | 16,71  | 256,68 | 413,64 | 442,21 | 370,08 | 606,91 | 388,51 | 507,99 |
| Caldas  | Pensilvania            | 170,34 | 162,82 | 45,45  | 11,37  | 34,11  | 238,82 | 204,78 | 128,98 | 140,36 | 269,52 |
| Caldas  | Riosucio               | 159,38 | 207,00 | 164,28 | 65,59  | 148,40 | 146,61 | 176,49 | 212,18 | 297,39 | 274,50 |
| Caldas  | Risaralda              | 411,25 | 338,20 | 175,85 | 69,12  | 89,76  | 50,43  | 71,43  | 154,75 | 177,40 | 475,13 |
| Caldas  | Salamina               | 149,09 | 162,52 | 101,58 | 141,73 | 238,98 | 345,84 | 312,27 | 359,50 | 432,82 | 465,80 |
| Caldas  | Samaná                 | 109,02 | 252,93 | 31,11  | 89,40  | 283,62 | 132,04 | 186,34 | 159,11 | 209,49 | 166,77 |
| Caldas  | San José               | 224,36 | 171,57 | 145,12 | 171,39 | 171,53 | 144,93 | 329,64 | 276,50 | 263,57 | 302,83 |
| Caldas  | Supía                  | 35,67  | 137,68 | 62,48  | 38,78  | 19,24  | 38,21  | 22,76  | 48,98  | 389,11 | 260,13 |
| Caldas  | Victoria               | 453,44 | 300,84 | 44,92  | 215,13 | 479,73 | 288,18 | 337,52 | 529,10 | 606,06 | 636,94 |
| Caldas  | Villamaría             | 122,38 | 152,54 | 159,58 | 162,36 | 149,65 | 238,98 | 247,34 | 387,48 | 277,07 | 355,51 |
| Caldas  | Viterbo                | 316,24 | 364,94 | 62,50  | 94,29  | 86,88  | 126,95 | 239,02 | 95,95  | 88,22  | 297,48 |
| Caquetá | Albania                | 31,24  | 31,19  | 0,00   | 46,71  | 15,57  | 15,58  | 0,00   | 31,11  | 124,42 | 171,02 |
| Caquetá | Belén de los Andaquies | 8,95   | 35,68  | 0,00   | 26,59  | 149,99 | 79,08  | 166,26 | 95,83  | 77,98  | 146,54 |
| Caquetá | Cartagena del Chairá   | 6,76   | 0,00   | 13,12  | 0,00   | 22,28  | 43,88  | 67,93  | 82,11  | 65,89  | 132,71 |
| Caquetá | Curillo                | 26,71  | 35,41  | 17,62  | 26,32  | 113,44 | 95,51  | 95,04  | 77,37  | 188,31 | 178,92 |
| Caquetá | El Doncello            | 46,12  | 4,60   | 9,17   | 9,14   | 59,28  | 122,81 | 181,50 | 208,25 | 176,18 | 103,68 |
| Caquetá | El Paujil              | 60,83  | 5,46   | 0,00   | 53,10  | 83,81  | 160,08 | 193,46 | 175,60 | 163,17 | 194,86 |
| Caquetá | Florencia              | 35,55  | 45,45  | 43,98  | 32,38  | 61,72  | 186,10 | 211,01 | 257,48 | 269,78 | 279,35 |
| Caquetá | La Montañita           | 0,00   | 17,73  | 13,21  | 13,13  | 13,05  | 8,64   | 4,29   | 63,95  | 67,74  | 96,68  |
| Caquetá | Milán                  | 43,31  | 51,88  | 0,00   | 0,00   | 34,38  | 51,46  | 25,66  | 42,67  | 34,06  | 25,48  |
| Caquetá | Morelia                | 0,00   | 0,00   | 0,00   | 0,00   | 0,00   | 26,62  | 132,52 | 158,27 | 288,49 | 208,55 |
| Caquetá | Puerto Rico            | 6,13   | 12,24  | 24,41  | 27,38  | 15,16  | 18,14  | 18,09  | 27,06  | 17,99  | 128,56 |

|          |                        |        |        |        |        |        |        |        |        |        |        |
|----------|------------------------|--------|--------|--------|--------|--------|--------|--------|--------|--------|--------|
| Caquetá  | San José del Fragua    | 21,29  | 7,04   | 20,98  | 76,39  | 130,99 | 136,88 | 129,15 | 87,74  | 227,87 | 226,23 |
| Caquetá  | San Vicente del Caguán | 3,40   | 11,69  | 8,20   | 8,05   | 26,88  | 71,42  | 120,45 | 148,23 | 158,84 | 167,60 |
| Caquetá  | Solano                 | 19,78  | 0,00   | 4,76   | 13,99  | 22,86  | 26,88  | 21,97  | 34,47  | 12,68  | 49,73  |
| Caquetá  | Solita                 | 32,82  | 54,68  | 65,65  | 65,58  | 153,01 | 54,65  | 54,69  | 10,93  | 164,11 | 76,56  |
| Caquetá  | Valparaíso             | 35,68  | 53,27  | 0,00   | 8,80   | 35,03  | 113,31 | 86,78  | 103,65 | 34,40  | 51,34  |
| Casanare | Aguazul                | 152,25 | 64,12  | 21,75  | 253,08 | 447,13 | 419,66 | 448,60 | 376,79 | 423,05 | 327,75 |
| Casanare | Chameza                | 50,81  | 49,04  | 0,00   | 46,04  | 44,76  | 0,00   | 85,03  | 332,23 | 203,25 | 199,12 |
| Casanare | Hato Corozal           | 104,79 | 112,16 | 64,26  | 99,02  | 141,59 | 217,18 | 281,59 | 276,61 | 65,86  | 218,38 |
| Casanare | La Salina              | 150,72 | 0,00   | 0,00   | 0,00   | 73,05  | 72,41  | 215,21 | 0,00   | 70,42  | 139,47 |
| Casanare | Maní                   | 143,18 | 340,44 | 35,86  | 44,81  | 152,41 | 412,52 | 430,80 | 565,58 | 457,85 | 377,36 |
| Casanare | Monterrey              | 219,90 | 29,87  | 110,21 | 180,88 | 185,26 | 428,40 | 339,43 | 375,84 | 465,24 | 386,13 |
| Casanare | Nunchía                | 246,86 | 257,58 | 0,00   | 255,01 | 184,50 | 827,21 | 492,10 | 409,60 | 317,21 | 248,11 |
| Casanare | Orocué                 | 343,03 | 88,35  | 237,83 | 49,73  | 407,31 | 441,34 | 207,14 | 169,47 | 132,39 | 335,41 |
| Casanare | Paz de Ariporo         | 40,64  | 70,34  | 144,62 | 59,45  | 223,42 | 354,49 | 250,55 | 359,93 | 326,99 | 418,33 |
| Casanare | Pore                   | 75,39  | 75,51  | 302,15 | 327,50 | 592,61 | 289,93 | 479,74 | 479,80 | 492,36 | 606,44 |
| Casanare | Recetor                | 34,58  | 0,00   | 0,00   | 0,00   | 57,59  | 0,00   | 0,00   | 0,00   | 0,00   | 402,65 |
| Casanare | Sabanalarga            | 119,80 | 333,64 | 122,74 | 218,14 | 378,91 | 512,66 | 292,87 | 428,19 | 200,87 | 373,77 |
| Casanare | Sácama                 | 0,00   | 0,00   | 54,67  | 53,71  | 634,25 | 313,15 | 411,52 | 455,93 | 99,95  | 147,49 |
| Casanare | San Luis de Palenque   | 628,85 | 239,87 | 132,73 | 66,04  | 328,60 | 235,42 | 247,14 | 271,77 | 270,37 | 243,28 |
| Casanare | Támara                 | 211,24 | 127,01 | 28,26  | 14,15  | 28,32  | 368,59 | 184,37 | 298,04 | 369,11 | 326,89 |
| Casanare | Tauramena              | 46,14  | 33,52  | 48,76  | 215,51 | 275,31 | 346,28 | 360,06 | 438,39 | 371,44 | 426,82 |
| Casanare | Trinidad               | 305,96 | 209,63 | 141,43 | 7,66   | 89,71  | 233,46 | 249,18 | 264,11 | 271,20 | 271,43 |
| Casanare | Villanueva             | 283,67 | 330,40 | 70,79  | 74,54  | 308,53 | 434,86 | 413,95 | 524,49 | 377,22 | 415,32 |
| Casanare | Yopal                  | 104,88 | 117,32 | 82,45  | 59,17  | 213,96 | 316,29 | 307,01 | 265,23 | 259,78 | 280,46 |
| Cauca    | Almaguer               | 9,68   | 4,82   | 81,52  | 219,74 | 195,15 | 90,15  | 170,30 | 188,73 | 188,30 | 192,61 |
| Cauca    | Argelia                | 0,00   | 35,89  | 130,49 | 82,33  | 120,47 | 100,07 | 118,23 | 128,43 | 104,81 | 211,30 |
| Cauca    | Balboa                 | 41,69  | 91,07  | 123,20 | 4,08   | 100,99 | 216,29 | 222,45 | 193,06 | 207,12 | 193,77 |

|       |               |       |        |        |        |        |        |        |        |        |        |
|-------|---------------|-------|--------|--------|--------|--------|--------|--------|--------|--------|--------|
| Cauca | Bolívar       | 0,00  | 38,59  | 38,54  | 76,96  | 135,53 | 171,36 | 150,75 | 240,29 | 342,96 | 243,85 |
| Cauca | Buenos Aires  | 0,00  | 10,57  | 6,93   | 78,25  | 133,61 | 147,57 | 273,65 | 287,57 | 251,36 | 213,19 |
| Cauca | Cajibío       | 2,84  | 8,46   | 5,60   | 108,37 | 107,43 | 133,89 | 238,42 | 300,93 | 349,13 | 361,97 |
| Cauca | Caldono       | 0,00  | 9,53   | 9,47   | 53,31  | 71,62  | 129,77 | 297,43 | 167,36 | 238,51 | 257,58 |
| Cauca | Caloto        | 0,00  | 177,94 | 68,80  | 234,73 | 405,74 | 513,23 | 648,91 | 823,54 | 578,17 | 469,46 |
| Cauca | Corinto       | 0,00  | 61,50  | 97,95  | 193,62 | 253,97 | 254,03 | 340,95 | 416,07 | 244,73 | 182,69 |
| Cauca | El Tambo      | 19,49 | 53,92  | 38,67  | 44,95  | 132,23 | 144,52 | 175,79 | 166,77 | 286,17 | 243,32 |
| Cauca | Florencia     | 0,00  | 148,69 | 263,90 | 345,79 | 49,31  | 196,88 | 654,99 | 719,07 | 603,39 | 748,45 |
| Cauca | Guachené      | 0,00  | 0,00   | 35,73  | 35,68  | 61,06  | 116,77 | 385,16 | 364,10 | 348,22 | 382,70 |
| Cauca | Guapi         | 0,00  | 30,99  | 78,89  | 27,34  | 68,11  | 115,40 | 186,09 | 151,82 | 215,33 | 171,16 |
| Cauca | Inzá          | 0,00  | 82,17  | 123,47 | 132,35 | 68,72  | 88,10  | 260,63 | 306,32 | 249,98 | 252,78 |
| Cauca | Jambaló       | 0,00  | 13,01  | 44,70  | 94,07  | 73,81  | 108,60 | 130,17 | 272,69 | 204,66 | 117,06 |
| Cauca | La Sierra     | 0,00  | 157,51 | 111,45 | 428,11 | 344,86 | 326,89 | 458,72 | 431,44 | 601,33 | 498,78 |
| Cauca | La Vega       | 2,49  | 34,19  | 79,11  | 235,60 | 152,99 | 178,09 | 168,83 | 206,62 | 162,41 | 160,59 |
| Cauca | López         | 0,00  | 0,00   | 10,18  | 10,13  | 25,18  | 80,16  | 39,85  | 59,43  | 9,84   | 34,24  |
| Cauca | Mercaderes    | 0,00  | 16,86  | 56,09  | 145,56 | 111,74 | 195,13 | 328,20 | 294,15 | 271,30 | 414,25 |
| Cauca | Miranda       | 2,91  | 48,60  | 190,99 | 229,05 | 289,97 | 242,07 | 302,98 | 325,62 | 266,88 | 237,30 |
| Cauca | Morales       | 4,06  | 4,04   | 28,10  | 59,85  | 186,28 | 137,76 | 257,92 | 217,21 | 261,91 | 278,98 |
| Cauca | Padilla       | 0,00  | 24,43  | 380,74 | 222,33 | 496,34 | 411,99 | 753,20 | 933,87 | 482,11 | 561,44 |
| Cauca | Paez          | 0,00  | 36,80  | 72,95  | 84,30  | 32,79  | 88,49  | 160,45 | 219,24 | 116,95 | 163,56 |
| Cauca | Patía         | 11,85 | 155,82 | 306,25 | 179,30 | 280,82 | 278,28 | 295,33 | 473,84 | 301,06 | 336,58 |
| Cauca | Piamonte      | 0,00  | 13,99  | 0,00   | 83,51  | 41,64  | 124,29 | 151,24 | 287,55 | 163,33 | 108,42 |
| Cauca | Piendamó      | 0,00  | 84,82  | 250,04 | 184,20 | 356,64 | 401,89 | 508,22 | 368,15 | 443,04 | 514,71 |
| Cauca | Popayán       | 19,60 | 45,05  | 72,40  | 179,81 | 241,39 | 284,83 | 404,46 | 471,42 | 528,93 | 604,17 |
| Cauca | Puerto Tejada | 0,00  | 129,78 | 183,02 | 126,85 | 237,30 | 377,98 | 433,97 | 346,94 | 350,28 | 220,33 |
| Cauca | Puracé        | 13,28 | 6,62   | 158,60 | 118,71 | 177,75 | 124,89 | 479,22 | 629,55 | 648,71 | 504,29 |
| Cauca | Rosas         | 0,00  | 195,76 | 226,00 | 511,55 | 362,07 | 528,41 | 509,85 | 643,01 | 548,79 | 627,52 |



|       |                        |        |        |        |        |        |        |        |        |        |        |
|-------|------------------------|--------|--------|--------|--------|--------|--------|--------|--------|--------|--------|
| Cauca | San Sebastián          | 0,00   | 7,63   | 83,21  | 75,02  | 37,21  | 258,13 | 314,14 | 391,11 | 258,55 | 341,54 |
| Cauca | Santa Rosa             | 0,00   | 30,58  | 90,99  | 10,02  | 49,62  | 78,57  | 165,31 | 144,51 | 47,71  | 47,23  |
| Cauca | Santander de Quilichao | 119,71 | 477,73 | 119,72 | 182,65 | 507,56 | 556,76 | 587,77 | 653,54 | 602,92 | 542,92 |
| Cauca | Silvia                 | 0,00   | 41,59  | 89,31  | 184,35 | 227,85 | 258,41 | 326,29 | 218,61 | 289,19 | 290,89 |
| Cauca | Sotara                 | 0,00   | 18,75  | 99,16  | 172,16 | 97,58  | 199,42 | 179,82 | 225,73 | 218,06 | 216,07 |
| Cauca | Suárez                 | 0,00   | 0,00   | 116,00 | 137,56 | 466,60 | 377,48 | 410,58 | 384,72 | 310,89 | 397,64 |
| Cauca | Sucre                  | 89,69  | 359,15 | 190,95 | 202,22 | 179,67 | 472,55 | 382,32 | 494,77 | 315,10 | 236,19 |
| Cauca | Timbío                 | 9,78   | 209,37 | 407,33 | 273,43 | 530,78 | 600,71 | 562,85 | 684,26 | 637,49 | 705,09 |
| Cauca | Timbiquí               | 0,00   | 4,76   | 4,75   | 28,43  | 28,32  | 37,59  | 84,18  | 65,15  | 9,25   | 32,20  |
| Cauca | Toribio                | 0,00   | 150,97 | 69,32  | 238,51 | 185,99 | 276,08 | 301,11 | 429,48 | 390,58 | 366,15 |
| Cauca | Totoró                 | 11,17  | 11,01  | 16,29  | 117,71 | 137,13 | 83,13  | 245,79 | 353,16 | 407,49 | 450,56 |
| Cauca | Villa Rica             | 6,81   | 424,16 | 259,45 | 302,33 | 538,51 | 621,64 | 550,70 | 593,94 | 475,63 | 426,91 |
| Cesar | Aguachica              | 33,13  | 11,68  | 12,68  | 1,14   | 12,38  | 77,83  | 129,72 | 151,12 | 76,38  | 117,12 |
| Cesar | Agustín Codazzi        | 1,87   | 13,17  | 3,78   | 0,00   | 30,63  | 80,91  | 182,29 | 166,03 | 143,62 | 148,66 |
| Cesar | Astrea                 | 0,00   | 5,36   | 0,00   | 0,00   | 0,00   | 0,00   | 78,70  | 250,91 | 250,07 | 145,42 |
| Cesar | Becerril               | 0,00   | 0,00   | 0,00   | 14,56  | 109,65 | 80,76  | 339,01 | 444,18 | 341,93 | 380,94 |
| Cesar | Bosconia               | 3,11   | 0,00   | 0,00   | 2,93   | 0,00   | 2,83   | 5,56   | 10,92  | 2,68   | 92,42  |
| Cesar | Chimichagua            | 0,00   | 0,00   | 9,70   | 6,47   | 84,21  | 175,15 | 175,43 | 123,70 | 159,83 | 176,56 |
| Cesar | Chiriguaná             | 9,23   | 18,65  | 0,00   | 4,77   | 96,66  | 166,35 | 138,76 | 135,56 | 203,56 | 196,13 |
| Cesar | Curumaní               | 0,00   | 0,00   | 0,00   | 57,67  | 202,48 | 303,77 | 351,69 | 255,12 | 209,30 | 153,94 |
| Cesar | El Copey               | 0,00   | 7,84   | 11,69  | 34,86  | 7,71   | 314,31 | 396,58 | 280,79 | 339,97 | 327,23 |
| Cesar | El Paso                | 4,70   | 9,31   | 9,22   | 4,57   | 4,53   | 0,00   | 8,91   | 269,28 | 21,90  | 78,22  |
| Cesar | Gamarra                | 0,00   | 13,24  | 0,00   | 0,00   | 38,03  | 43,77  | 80,19  | 79,09  | 12,02  | 17,80  |
| Cesar | González               | 0,00   | 94,04  | 0,00   | 0,00   | 0,00   | 65,61  | 148,47 | 180,61 | 243,20 | 220,95 |
| Cesar | La Gloria              | 0,00   | 0,00   | 0,00   | 0,00   | 44,08  | 81,80  | 195,89 | 244,11 | 216,42 | 164,58 |
| Cesar | La Jagua de Ibirico    | 9,05   | 0,00   | 0,00   | 58,66  | 252,43 | 229,67 | 319,39 | 305,54 | 242,35 | 188,25 |
| Cesar | La Paz                 | 0,00   | 31,48  | 0,00   | 0,00   | 4,44   | 8,84   | 101,42 | 184,61 | 210,39 | 139,82 |

|       |                         |       |       |        |        |        |        |        |        |        |        |
|-------|-------------------------|-------|-------|--------|--------|--------|--------|--------|--------|--------|--------|
| Cesar | Manaure                 | 0,00  | 0,00  | 7,96   | 23,30  | 37,88  | 88,74  | 187,75 | 317,17 | 172,25 | 262,54 |
| Cesar | Pailitas                | 0,00  | 0,00  | 6,07   | 0,00   | 5,98   | 403,94 | 365,87 | 328,31 | 326,23 | 335,88 |
| Cesar | Pelaya                  | 0,00  | 0,00  | 0,00   | 0,00   | 51,72  | 222,45 | 334,11 | 382,11 | 139,59 | 266,34 |
| Cesar | Pueblo Bello            | 0,00  | 0,00  | 0,00   | 0,00   | 24,81  | 14,51  | 70,77  | 133,45 | 85,30  | 201,43 |
| Cesar | Río de Oro              | 13,94 | 13,97 | 14,00  | 112,32 | 119,65 | 134,10 | 198,19 | 248,49 | 277,76 | 171,50 |
| Cesar | San Alberto             | 38,26 | 0,00  | 0,00   | 13,46  | 188,95 | 150,71 | 156,12 | 173,74 | 101,41 | 91,56  |
| Cesar | San Diego               | 0,00  | 0,00  | 0,00   | 95,55  | 36,86  | 81,35  | 155,84 | 141,51 | 261,66 | 187,66 |
| Cesar | San Martín              | 28,42 | 16,93 | 16,81  | 61,18  | 359,33 | 54,91  | 92,78  | 292,84 | 161,74 | 58,98  |
| Cesar | Tamalameque             | 0,00  | 28,53 | 0,00   | 21,45  | 21,47  | 50,18  | 100,52 | 172,71 | 173,14 | 202,34 |
| Cesar | Valledupar              | 36,09 | 1,56  | 2,54   | 5,95   | 8,23   | 56,46  | 65,32  | 75,81  | 74,14  | 92,18  |
| Choco | Riosucio                | 0,00  | 0,00  | 7,01   | 3,50   | 3,49   | 0,00   | 0,00   | 0,00   | 0,00   | 0,00   |
| Chocó | Acandí                  | 0,00  | 0,00  | 0,00   | 19,97  | 30,24  | 10,16  | 20,50  | 0,00   | 0,00   | 0,00   |
| Chocó | Alto Baudó              | 0,00  | 51,52 | 31,47  | 0,00   | 3,00   | 2,93   | 0,00   | 5,58   | 0,00   | 0,00   |
| Chocó | Atrato                  | 0,00  | 0,00  | 0,00   | 0,00   | 0,00   | 0,00   | 42,54  | 0,00   | 0,00   | 29,43  |
| Chocó | Bagadó                  | 0,00  | 0,00  | 0,00   | 0,00   | 0,00   | 0,00   | 12,28  | 0,00   | 37,20  | 0,00   |
| Chocó | Bahía Solano            | 0,00  | 0,00  | 32,66  | 10,86  | 0,00   | 0,00   | 0,00   | 21,50  | 42,89  | 53,47  |
| Chocó | Bajo Baudó              | 0,00  | 0,00  | 297,94 | 5,92   | 0,00   | 0,00   | 0,00   | 23,13  | 5,75   | 0,00   |
| Chocó | Belén de Bajira         | 0,00  | 0,00  | 0,00   | 0,00   | 0,00   | 0,00   | 0,00   | 0,00   | 0,00   | 0,00   |
| Chocó | Bojaya                  | 0,00  | 0,00  | 199,94 | 0,00   | 0,00   | 0,00   | 0,00   | 0,00   | 0,00   | 19,79  |
| Chocó | Carmen del Darien       | 0,00  | 0,00  | 0,00   | 0,00   | 0,00   | 0,00   | 0,00   | 18,41  | 18,31  | 72,83  |
| Chocó | Cértegui                | 0,00  | 0,00  | 0,00   | 0,00   | 0,00   | 10,09  | 0,00   | 0,00   | 0,00   | 0,00   |
| Chocó | Condoto                 | 14,97 | 44,42 | 80,45  | 36,13  | 42,85  | 0,00   | 48,86  | 41,41  | 0,00   | 6,75   |
| Chocó | El Cantón del San Pablo | 0,00  | 0,00  | 0,00   | 0,00   | 0,00   | 67,60  | 0,00   | 0,00   | 0,00   | 0,00   |
| Chocó | El Carmen de Atrato     | 0,00  | 80,19 | 0,00   | 38,73  | 38,10  | 44,94  | 51,53  | 57,89  | 7,12   | 55,98  |
| Chocó | El Litoral del San Juan | 0,00  | 0,00  | 14,92  | 0,00   | 0,00   | 0,00   | 0,00   | 13,42  | 0,00   | 0,00   |
| Chocó | Istmina                 | 0,00  | 0,00  | 0,00   | 4,09   | 4,06   | 4,03   | 4,00   | 3,97   | 0,00   | 0,00   |
| Chocó | Juradó                  | 0,00  | 0,00  | 0,00   | 0,00   | 0,00   | 146,76 | 0,00   | 0,00   | 0,00   | 0,00   |

|         |                     |       |       |        |        |        |        |        |        |        |        |
|---------|---------------------|-------|-------|--------|--------|--------|--------|--------|--------|--------|--------|
| Chocó   | Lloró               | 0,00  | 0,00  | 9,40   | 9,32   | 0,00   | 0,00   | 0,00   | 0,00   | 0,00   | 0,00   |
| Chocó   | Medio Atrato        | 0,00  | 0,00  | 0,00   | 0,00   | 0,00   | 0,00   | 3,62   | 3,50   | 0,00   | 0,00   |
| Chocó   | Medio Baudó         | 0,00  | 0,00  | 88,45  | 0,00   | 0,00   | 0,00   | 0,00   | 0,00   | 0,00   | 0,00   |
| Chocó   | Medio San Juan      | 0,00  | 71,83 | 91,32  | 20,60  | 13,43  | 39,38  | 6,41   | 0,00   | 0,00   | 0,00   |
| Chocó   | Nóvita              | 0,00  | 0,00  | 12,66  | 0,00   | 25,25  | 0,00   | 25,19  | 0,00   | 0,00   | 0,00   |
| Chocó   | Nuquí               | 0,00  | 0,00  | 262,63 | 12,36  | 0,00   | 12,08  | 23,88  | 11,79  | 23,32  | 57,68  |
| Chocó   | Quibdó              | 0,00  | 6,15  | 2,63   | 8,73   | 5,23   | 8,69   | 36,43  | 45,88  | 12,10  | 28,47  |
| Chocó   | Río Iro             | 0,00  | 0,00  | 34,48  | 0,00   | 0,00   | 0,00   | 0,00   | 0,00   | 0,00   | 0,00   |
| Chocó   | Río Quito           | 0,00  | 12,21 | 24,08  | 0,00   | 23,48  | 0,00   | 0,00   | 11,30  | 0,00   | 0,00   |
| Chocó   | San José del Palmar | 0,00  | 0,00  | 20,12  | 60,62  | 142,07 | 0,00   | 82,05  | 102,99 | 0,00   | 0,00   |
| Chocó   | Sipí                | 0,00  | 0,00  | 0,00   | 0,00   | 0,00   | 0,00   | 0,00   | 0,00   | 0,00   | 0,00   |
| Chocó   | Tadó                | 0,00  | 0,00  | 0,00   | 5,40   | 0,00   | 0,00   | 32,00  | 0,00   | 0,00   | 0,00   |
| Chocó   | Unguía              | 0,00  | 0,00  | 0,00   | 0,00   | 0,00   | 13,36  | 6,66   | 6,63   | 0,00   | 0,00   |
| Chocó   | Unión Panamericana  | 0,00  | 0,00  | 0,00   | 0,00   | 22,23  | 0,00   | 0,00   | 0,00   | 0,00   | 0,00   |
| Córdoba | Ayapel              | 0,00  | 0,00  | 2,19   | 6,45   | 21,09  | 49,66  | 79,19  | 151,39 | 115,32 | 69,02  |
| Córdoba | Buenavista          | 0,00  | 30,40 | 150,07 | 98,72  | 97,43  | 62,47  | 75,89  | 98,30  | 60,11  | 164,27 |
| Córdoba | Canalete            | 0,00  | 10,85 | 26,55  | 51,96  | 71,14  | 124,19 | 63,13  | 71,23  | 88,18  | 186,06 |
| Córdoba | Cereté              | 2,34  | 15,09 | 69,04  | 95,80  | 84,78  | 146,79 | 176,62 | 139,89 | 255,67 | 212,34 |
| Córdoba | Chimá               | 0,00  | 0,00  | 0,00   | 13,96  | 20,75  | 13,70  | 115,32 | 40,31  | 19,98  | 26,38  |
| Córdoba | Chinú               | 2,26  | 6,72  | 70,86  | 146,64 | 82,23  | 128,37 | 196,76 | 171,58 | 225,65 | 219,08 |
| Córdoba | Ciénaga de Oro      | 0,00  | 24,90 | 122,19 | 71,93  | 199,93 | 125,26 | 176,24 | 212,59 | 132,35 | 120,66 |
| Córdoba | Cotorra             | 6,60  | 72,40 | 164,23 | 131,04 | 372,52 | 201,95 | 136,54 | 123,26 | 12,95  | 51,66  |
| Córdoba | La Apartada         | 0,00  | 14,93 | 0,00   | 0,00   | 0,00   | 13,89  | 61,37  | 60,27  | 85,50  | 32,30  |
| Córdoba | Lorica              | 42,94 | 73,75 | 146,46 | 121,77 | 150,47 | 130,39 | 163,76 | 138,80 | 166,61 | 241,05 |
| Córdoba | Los Córdoba         | 5,30  | 20,61 | 10,02  | 121,72 | 118,27 | 114,85 | 107,15 | 99,71  | 130,47 | 102,16 |
| Córdoba | Momil               | 0,00  | 7,07  | 105,37 | 6,98   | 48,50  | 337,00 | 375,58 | 250,81 | 302,74 | 287,39 |
| Córdoba | Moñitos             | 0,00  | 0,00  | 0,00   | 3,94   | 7,76   | 38,18  | 63,93  | 51,83  | 61,97  | 17,95  |

|              |                         |       |        |        |        |        |        |        |        |        |        |
|--------------|-------------------------|-------|--------|--------|--------|--------|--------|--------|--------|--------|--------|
| Córdoba      | Montelíbano             | 0,00  | 2,89   | 8,46   | 4,13   | 40,39  | 52,62  | 123,44 | 116,92 | 135,23 | 212,79 |
| Córdoba      | Montería                | 5,63  | 35,25  | 46,86  | 59,09  | 142,36 | 174,80 | 168,46 | 186,00 | 187,40 | 183,84 |
| Córdoba      | Planeta Rica            | 0,00  | 20,55  | 7,84   | 1,55   | 26,18  | 12,21  | 10,59  | 21,01  | 49,12  | 63,46  |
| Córdoba      | Pueblo Nuevo            | 0,00  | 0,00   | 23,43  | 54,55  | 61,86  | 112,99 | 94,51  | 58,21  | 31,12  | 27,97  |
| Córdoba      | Puerto Escondido        | 8,68  | 12,65  | 12,29  | 75,64  | 69,55  | 90,05  | 69,19  | 42,41  | 41,18  | 43,31  |
| Córdoba      | Puerto Libertador       | 0,00  | 5,25   | 0,00   | 7,39   | 62,02  | 30,03  | 60,41  | 125,68 | 128,04 | 89,47  |
| Córdoba      | Purísima                | 0,00  | 0,00   | 13,50  | 40,40  | 93,89  | 66,90  | 206,82 | 186,33 | 145,96 | 231,57 |
| Córdoba      | Sahagún                 | 0,00  | 57,81  | 163,91 | 144,31 | 191,11 | 258,96 | 280,64 | 227,52 | 219,21 | 196,46 |
| Córdoba      | San Andrés Sotavento    | 42,36 | 64,62  | 38,33  | 122,69 | 140,27 | 141,66 | 128,14 | 158,44 | 119,31 | 59,26  |
| Córdoba      | San Antero              | 0,00  | 116,11 | 131,79 | 125,91 | 284,89 | 272,89 | 178,57 | 139,62 | 121,15 | 147,14 |
| Córdoba      | San Bernardo del Viento | 0,00  | 43,34  | 144,05 | 127,40 | 198,04 | 151,39 | 152,72 | 183,04 | 207,00 | 187,71 |
| Córdoba      | San Carlos              | 0,00  | 0,00   | 8,02   | 0,00   | 77,99  | 92,30  | 121,37 | 123,42 | 243,51 | 127,34 |
| Córdoba      | San José de Uré         | 0,00  | 0,00   | 0,00   | 0,00   | 0,00   | 0,00   | 18,75  | 83,16  | 9,10   | 35,80  |
| Córdoba      | San Pelayo              | 0,00  | 4,94   | 29,35  | 29,04  | 16,76  | 18,95  | 37,49  | 64,92  | 29,83  | 29,50  |
| Córdoba      | Tierralta               | 0,00  | 34,32  | 110,97 | 79,02  | 77,15  | 52,72  | 38,85  | 20,50  | 19,02  | 68,39  |
| Córdoba      | Tuchín                  | 0,00  | 0,00   | 27,30  | 47,50  | 31,94  | 76,66  | 108,26 | 119,37 | 92,80  | 111,38 |
| Córdoba      | Valencia                | 0,00  | 0,00   | 13,32  | 70,34  | 94,25  | 146,91 | 102,23 | 190,43 | 118,68 | 202,48 |
| Cundinamarca | Agua de Dios            | 0,00  | 69,16  | 287,06 | 341,54 | 458,63 | 284,24 | 465,45 | 306,78 | 263,76 | 733,27 |
| Cundinamarca | Albán                   | 16,80 | 100,79 | 134,36 | 67,18  | 117,55 | 386,23 | 100,76 | 369,38 | 235,06 | 33,58  |
| Cundinamarca | Anapoima                | 8,46  | 91,67  | 98,55  | 97,13  | 446,61 | 306,34 | 309,89 | 419,66 | 307,99 | 510,58 |
| Cundinamarca | Anolaima                | 7,66  | 154,24 | 209,69 | 383,26 | 204,90 | 452,42 | 344,22 | 451,36 | 324,91 | 417,69 |
| Cundinamarca | Apulo                   | 0,00  | 51,17  | 115,15 | 435,06 | 588,69 | 652,76 | 652,76 | 614,44 | 460,83 | 448,03 |
| Cundinamarca | Arbeláez                | 16,80 | 175,67 | 116,65 | 124,43 | 140,41 | 361,99 | 336,04 | 473,59 | 154,57 | 340,63 |
| Cundinamarca | Beltrán                 | 0,00  | 0,00   | 0,00   | 0,00   | 191,48 | 142,18 | 93,68  | 46,15  | 91,03  | 0,00   |
| Cundinamarca | Bituima                 | 0,00  | 38,23  | 38,52  | 77,31  | 77,40  | 234,47 | 195,77 | 157,67 | 277,78 | 119,62 |
| Cundinamarca | Bojacá                  | 31,94 | 103,59 | 151,39 | 236,03 | 201,28 | 168,10 | 364,43 | 319,89 | 441,37 | 506,54 |
| Cundinamarca | Cabrera                 | 0,00  | 0,00   | 324,96 | 239,23 | 349,42 | 219,30 | 418,50 | 530,97 | 577,91 | 334,97 |

|              |                  |       |        |        |        |        |        |        |        |        |        |
|--------------|------------------|-------|--------|--------|--------|--------|--------|--------|--------|--------|--------|
| Cundinamarca | Cachipay         | 10,03 | 0,00   | 10,06  | 110,81 | 100,91 | 192,07 | 273,47 | 192,82 | 325,43 | 407,71 |
| Cundinamarca | Cajicá           | 6,29  | 86,04  | 234,19 | 168,30 | 212,46 | 434,48 | 430,80 | 418,25 | 374,51 | 491,07 |
| Cundinamarca | Caparrapí        | 0,00  | 0,00   | 6,03   | 60,24  | 42,13  | 84,15  | 48,05  | 137,93 | 59,91  | 83,78  |
| Cundinamarca | Caqueza          | 0,00  | 156,78 | 198,33 | 149,72 | 340,08 | 344,68 | 437,95 | 536,21 | 428,20 | 455,37 |
| Cundinamarca | Carmen de Carupa | 0,00  | 127,34 | 184,03 | 205,62 | 56,70  | 168,82 | 212,15 | 199,31 | 109,78 | 174,08 |
| Cundinamarca | Chaguaní         | 0,00  | 24,65  | 74,33  | 149,22 | 74,70  | 175,04 | 150,04 | 426,71 | 251,19 | 150,79 |
| Cundinamarca | Chía             | 10,62 | 121,29 | 146,57 | 207,15 | 117,51 | 174,04 | 192,18 | 302,41 | 334,79 | 366,37 |
| Cundinamarca | Chipaque         | 0,00  | 95,27  | 95,26  | 190,52 | 142,87 | 369,09 | 273,84 | 607,14 | 523,81 | 607,14 |
| Cundinamarca | Choachí          | 18,03 | 126,66 | 263,21 | 273,47 | 164,79 | 358,09 | 323,30 | 435,95 | 344,86 | 449,44 |
| Cundinamarca | Chocontá         | 4,86  | 0,00   | 60,02  | 139,50 | 57,01  | 76,92  | 129,17 | 178,72 | 372,17 | 266,46 |
| Cundinamarca | Cogua            | 0,00  | 35,95  | 130,87 | 138,11 | 188,57 | 189,59 | 148,72 | 145,91 | 237,02 | 324,76 |
| Cundinamarca | Cota             | 28,74 | 135,66 | 164,59 | 272,67 | 270,99 | 483,22 | 569,11 | 602,31 | 678,28 | 802,14 |
| Cundinamarca | Cucunubá         | 0,00  | 97,85  | 152,78 | 151,56 | 315,03 | 136,04 | 365,01 | 322,88 | 334,27 | 372,29 |
| Cundinamarca | El Colegio       | 0,00  | 138,80 | 57,03  | 84,92  | 178,17 | 358,81 | 314,93 | 465,16 | 696,23 | 747,19 |
| Cundinamarca | El Peñón         | 0,00  | 20,33  | 0,00   | 81,93  | 20,57  | 247,63 | 351,53 | 228,31 | 145,68 | 353,65 |
| Cundinamarca | El Rosal         | 14,03 | 75,25  | 186,84 | 280,00 | 292,42 | 409,38 | 376,08 | 580,71 | 550,60 | 708,30 |
| Cundinamarca | Facatativá       | 17,78 | 118,32 | 224,03 | 246,98 | 175,77 | 324,57 | 321,48 | 348,57 | 341,39 | 331,54 |
| Cundinamarca | Fomeque          | 8,26  | 173,24 | 263,50 | 164,41 | 246,43 | 484,44 | 385,25 | 483,37 | 368,43 | 547,65 |
| Cundinamarca | Fosca            | 0,00  | 58,15  | 114,93 | 70,96  | 98,11  | 166,04 | 150,21 | 94,31  | 199,36 | 262,12 |
| Cundinamarca | Funza            | 3,11  | 59,41  | 79,07  | 96,50  | 97,44  | 290,84 | 299,04 | 278,52 | 321,17 | 394,83 |
| Cundinamarca | Fúquene          | 37,90 | 188,25 | 112,17 | 37,12  | 239,45 | 219,26 | 126,83 | 143,70 | 373,87 | 476,27 |
| Cundinamarca | Fusagasugá       | 14,93 | 175,26 | 158,04 | 144,81 | 154,70 | 261,27 | 306,26 | 287,31 | 252,74 | 239,13 |
| Cundinamarca | Gachala          | 17,04 | 0,00   | 68,68  | 258,49 | 190,18 | 381,61 | 313,15 | 244,29 | 209,97 | 52,62  |
| Cundinamarca | Gachancipá       | 0,00  | 42,03  | 73,52  | 190,72 | 309,02 | 210,34 | 190,09 | 405,46 | 498,55 | 445,01 |
| Cundinamarca | Gachetá          | 0,00  | 28,33  | 243,93 | 121,12 | 259,14 | 128,74 | 283,52 | 399,38 | 342,77 | 277,70 |
| Cundinamarca | Gama             | 25,69 | 76,86  | 204,39 | 0,00   | 203,10 | 202,43 | 151,29 | 100,50 | 350,35 | 274,25 |
| Cundinamarca | Girardot         | 4,02  | 156,55 | 220,70 | 205,32 | 320,02 | 315,00 | 286,98 | 324,48 | 320,69 | 351,94 |

|              |                     |        |        |        |        |        |        |        |        |        |        |
|--------------|---------------------|--------|--------|--------|--------|--------|--------|--------|--------|--------|--------|
| Cundinamarca | Granada             | 0,00   | 0,00   | 290,62 | 193,62 | 365,61 | 246,46 | 324,75 | 388,33 | 472,08 | 416,81 |
| Cundinamarca | Guachetá            | 17,41  | 26,14  | 340,23 | 305,68 | 393,46 | 393,91 | 490,75 | 342,17 | 500,66 | 413,30 |
| Cundinamarca | Guaduas             | 12,09  | 192,78 | 145,51 | 168,48 | 128,96 | 217,43 | 213,50 | 180,43 | 195,49 | 240,64 |
| Cundinamarca | Guasca              | 178,74 | 190,83 | 262,51 | 339,08 | 572,05 | 512,67 | 518,10 | 557,85 | 589,47 | 566,55 |
| Cundinamarca | Guataquí            | 0,00   | 79,30  | 276,13 | 196,16 | 234,10 | 116,32 | 77,07  | 153,14 | 228,14 | 37,75  |
| Cundinamarca | Guatavita           | 14,85  | 59,20  | 191,91 | 235,68 | 322,63 | 336,50 | 175,00 | 247,31 | 376,92 | 375,51 |
| Cundinamarca | Guayabal de Siquima | 0,00   | 110,04 | 247,87 | 303,11 | 385,78 | 303,11 | 55,08  | 165,11 | 384,83 | 246,98 |
| Cundinamarca | Guayabetal          | 0,00   | 228,64 | 413,48 | 123,61 | 513,98 | 594,26 | 408,00 | 548,67 | 365,04 | 282,31 |
| Cundinamarca | Gutiérrez           | 27,86  | 0,00   | 80,97  | 371,55 | 260,69 | 256,94 | 126,17 | 173,40 | 244,08 | 215,62 |
| Cundinamarca | Jerusalén           | 0,00   | 0,00   | 111,28 | 259,36 | 445,93 | 483,45 | 409,23 | 223,63 | 410,60 | 74,54  |
| Cundinamarca | Junín               | 35,68  | 166,15 | 200,90 | 94,24  | 211,39 | 328,06 | 23,35  | 116,43 | 162,60 | 266,08 |
| Cundinamarca | La Calera           | 48,87  | 164,37 | 201,43 | 175,18 | 95,87  | 325,15 | 615,44 | 754,54 | 773,79 | 713,82 |
| Cundinamarca | La Mesa             | 28,68  | 208,54 | 181,12 | 257,39 | 236,76 | 286,70 | 289,08 | 391,73 | 417,86 | 468,21 |
| Cundinamarca | La Palma            | 29,80  | 29,58  | 68,48  | 29,11  | 19,25  | 76,39  | 85,28  | 319,46 | 111,87 | 267,92 |
| Cundinamarca | La Peña             | 0,00   | 128,59 | 185,66 | 214,10 | 99,86  | 228,08 | 313,43 | 270,50 | 256,08 | 127,93 |
| Cundinamarca | La Vega             | 0,00   | 58,98  | 263,56 | 181,61 | 86,62  | 329,68 | 441,22 | 275,72 | 295,15 | 572,39 |
| Cundinamarca | Lenguazaque         | 0,00   | 30,25  | 150,59 | 9,99   | 129,19 | 69,18  | 167,17 | 293,63 | 194,78 | 116,45 |
| Cundinamarca | Macheta             | 0,00   | 164,97 | 150,94 | 76,08  | 214,76 | 216,52 | 249,45 | 125,71 | 237,49 | 302,93 |
| Cundinamarca | Madrid              | 4,58   | 120,82 | 230,51 | 224,14 | 95,02  | 295,54 | 371,31 | 295,62 | 316,90 | 350,10 |
| Cundinamarca | Manta               | 0,00   | 43,24  | 517,02 | 172,15 | 85,95  | 299,40 | 234,79 | 255,48 | 381,44 | 549,45 |
| Cundinamarca | Medina              | 0,00   | 50,34  | 150,68 | 20,05  | 10,00  | 239,43 | 159,08 | 198,43 | 217,65 | 167,75 |
| Cundinamarca | Mosquera            | 5,97   | 59,51  | 69,22  | 137,55 | 160,74 | 135,68 | 233,92 | 282,57 | 309,37 | 398,39 |
| Cundinamarca | Nariño              | 0,00   | 188,77 | 328,79 | 420,56 | 697,35 | 693,48 | 367,65 | 182,73 | 363,14 | 180,34 |
| Cundinamarca | Nemocón             | 0,00   | 8,36   | 172,50 | 129,11 | 206,14 | 280,55 | 183,91 | 308,99 | 318,80 | 335,59 |
| Cundinamarca | Nilo                | 0,00   | 19,57  | 88,88  | 191,68 | 132,51 | 176,04 | 217,28 | 167,37 | 195,82 | 95,46  |
| Cundinamarca | Nimaima             | 0,00   | 51,35  | 185,03 | 82,47  | 178,08 | 31,75  | 31,12  | 30,55  | 29,94  | 29,37  |
| Cundinamarca | Nocaima             | 0,00   | 0,00   | 38,51  | 76,69  | 50,92  | 215,52 | 88,18  | 376,55 | 112,44 | 285,54 |

|              |                            |       |        |        |        |        |        |        |        |        |        |
|--------------|----------------------------|-------|--------|--------|--------|--------|--------|--------|--------|--------|--------|
| Cundinamarca | Pacho                      | 11,68 | 7,73   | 7,68   | 19,07  | 41,66  | 240,60 | 373,33 | 318,67 | 312,74 | 379,73 |
| Cundinamarca | Paime                      | 0,00  | 0,00   | 0,00   | 0,00   | 0,00   | 0,00   | 64,25  | 261,49 | 155,49 | 22,69  |
| Cundinamarca | Pandi                      | 0,00  | 181,42 | 288,81 | 342,22 | 286,53 | 196,60 | 320,57 | 142,02 | 300,46 | 405,21 |
| Cundinamarca | Paratebueno                | 0,00  | 66,53  | 198,75 | 171,55 | 223,42 | 431,99 | 352,07 | 246,82 | 375,36 | 386,90 |
| Cundinamarca | Pasca                      | 0,00  | 78,67  | 69,27  | 120,14 | 119,05 | 176,92 | 133,57 | 215,36 | 238,19 | 252,63 |
| Cundinamarca | Puerto Salgar              | 18,57 | 18,22  | 53,67  | 35,12  | 143,74 | 146,65 | 260,53 | 223,23 | 203,34 | 273,55 |
| Cundinamarca | Pulí                       | 0,00  | 0,00   | 0,00   | 304,36 | 101,21 | 168,92 | 201,68 | 436,10 | 33,34  | 99,77  |
| Cundinamarca | Quebradanegra              | 0,00  | 85,03  | 42,47  | 276,13 | 42,35  | 127,09 | 148,15 | 211,28 | 126,64 | 168,60 |
| Cundinamarca | Quetame                    | 14,96 | 74,22  | 132,33 | 233,17 | 144,53 | 831,66 | 99,56  | 155,15 | 364,09 | 194,63 |
| Cundinamarca | Quipile                    | 12,23 | 170,94 | 12,23  | 85,51  | 207,98 | 232,44 | 183,58 | 220,56 | 171,48 | 171,40 |
| Cundinamarca | Ricaurte                   | 0,00  | 46,95  | 185,08 | 330,64 | 415,36 | 563,91 | 447,16 | 365,04 | 402,50 | 511,54 |
| Cundinamarca | San Antonio del Tequendama | 7,99  | 7,94   | 236,89 | 117,79 | 62,43  | 372,58 | 447,91 | 422,43 | 374,50 | 479,16 |
| Cundinamarca | San Bernardo               | 0,00  | 86,48  | 172,38 | 133,55 | 161,63 | 227,19 | 188,75 | 197,44 | 262,42 | 252,22 |
| Cundinamarca | San Cayetano               | 0,00  | 18,86  | 0,00   | 94,04  | 37,57  | 0,00   | 18,74  | 131,09 | 74,85  | 186,99 |
| Cundinamarca | San Francisco              | 0,00  | 289,12 | 319,05 | 538,72 | 476,14 | 610,69 | 547,68 | 518,46 | 365,12 | 554,87 |
| Cundinamarca | San Juan de Río Seco       | 0,00  | 30,81  | 41,15  | 195,71 | 371,29 | 299,37 | 268,62 | 320,45 | 72,39  | 72,40  |
| Cundinamarca | Sasaima                    | 9,71  | 222,44 | 346,15 | 325,51 | 419,25 | 588,07 | 339,94 | 583,15 | 654,94 | 670,27 |
| Cundinamarca | Sesquilé                   | 0,00  | 18,30  | 17,66  | 136,40 | 312,71 | 405,53 | 430,01 | 393,38 | 365,96 | 409,44 |
| Cundinamarca | Sibaté                     | 15,15 | 53,47  | 180,60 | 274,25 | 266,25 | 324,56 | 291,66 | 238,66 | 236,91 | 283,76 |
| Cundinamarca | Silvania                   | 13,93 | 203,61 | 235,30 | 243,94 | 491,23 | 544,87 | 575,68 | 578,88 | 564,05 | 517,71 |
| Cundinamarca | Simijaca                   | 8,78  | 172,44 | 279,66 | 133,23 | 270,16 | 362,41 | 221,61 | 350,17 | 390,00 | 398,65 |
| Cundinamarca | Soacha                     | 18,65 | 61,70  | 64,02  | 64,26  | 112,22 | 145,42 | 192,23 | 213,76 | 241,75 | 246,92 |
| Cundinamarca | Sopó                       | 0,00  | 4,38   | 94,08  | 192,17 | 53,09  | 251,47 | 343,60 | 442,97 | 384,77 | 504,77 |
| Cundinamarca | Subachoque                 | 14,63 | 85,95  | 336,61 | 171,69 | 127,83 | 369,05 | 316,39 | 329,32 | 304,03 | 212,96 |
| Cundinamarca | Suesca                     | 6,75  | 99,23  | 123,30 | 171,87 | 212,18 | 348,97 | 348,18 | 453,29 | 381,11 | 322,76 |
| Cundinamarca | Supatá                     | 0,00  | 0,00   | 40,16  | 20,04  | 220,04 | 100,00 | 179,60 | 438,42 | 477,90 | 437,12 |
| Cundinamarca | Susa                       | 9,83  | 86,36  | 28,11  | 64,02  | 107,23 | 156,99 | 85,19  | 74,86  | 56,90  | 71,47  |





|          |                       |        |        |       |        |        |        |        |        |        |        |
|----------|-----------------------|--------|--------|-------|--------|--------|--------|--------|--------|--------|--------|
| Guainía  | Infrida               | 92,91  | 81,05  | 0,00  | 111,08 | 99,50  | 155,59 | 282,57 | 341,12 | 277,55 | 270,23 |
| Guainía  | La Guadalupe          | 0,00   | 0,00   | 0,00  | 0,00   | 0,00   | 0,00   | 0,00   | 0,00   | 0,00   | 0,00   |
| Guainía  | Mapiripana            | 0,00   | 0,00   | 0,00  | 0,00   | 0,00   | 0,00   | 0,00   | 0,00   | 0,00   | 0,00   |
| Guainía  | Morichal              | 0,00   | 0,00   | 0,00  | 0,00   | 0,00   | 0,00   | 0,00   | 0,00   | 0,00   | 0,00   |
| Guainía  | Pana Pana             | 0,00   | 0,00   | 0,00  | 0,00   | 0,00   | 0,00   | 0,00   | 0,00   | 0,00   | 0,00   |
| Guainía  | Puerto Colombia       | 0,00   | 0,00   | 0,00  | 0,00   | 69,09  | 0,00   | 0,00   | 0,00   | 0,00   | 0,00   |
| Guainía  | San Felipe            | 0,00   | 0,00   | 0,00  | 0,00   | 0,00   | 54,98  | 105,60 | 50,74  | 0,00   | 0,00   |
| Guaviare | Calamar               | 9,27   | 47,26  | 86,77 | 147,62 | 120,63 | 195,19 | 304,65 | 268,70 | 363,00 | 337,99 |
| Guaviare | El Retorno            | 15,11  | 24,70  | 33,92 | 23,78  | 46,70  | 119,25 | 67,59  | 75,28  | 121,87 | 77,04  |
| Guaviare | Miraflores            | 0,00   | 8,19   | 15,97 | 46,74  | 38,02  | 89,11  | 116,06 | 120,47 | 110,81 | 74,48  |
| Guaviare | San José del Guaviare | 51,66  | 20,99  | 22,33 | 60,72  | 134,25 | 185,72 | 166,57 | 162,22 | 139,42 | 138,70 |
| Huila    | Acevedo               | 173,79 | 24,78  | 6,92  | 37,26  | 182,25 | 113,47 | 44,42  | 189,39 | 267,39 | 315,26 |
| Huila    | Agrado                | 151,11 | 254,13 | 57,36 | 56,98  | 113,16 | 292,53 | 323,88 | 355,36 | 419,38 | 384,07 |
| Huila    | Aipe                  | 33,34  | 23,14  | 9,00  | 43,74  | 72,30  | 198,60 | 225,38 | 207,55 | 255,38 | 196,66 |
| Huila    | Algeciras             | 202,57 | 4,20   | 79,35 | 41,56  | 12,42  | 82,45  | 193,03 | 298,85 | 216,40 | 284,97 |
| Huila    | Altamira              | 0,00   | 0,00   | 0,00  | 0,00   | 49,96  | 196,17 | 72,22  | 142,05 | 163,06 | 205,62 |
| Huila    | Baraya                | 237,27 | 42,94  | 42,73 | 53,16  | 21,18  | 189,53 | 157,35 | 292,43 | 301,67 | 207,34 |
| Huila    | Campoalegre           | 198,86 | 6,08   | 30,18 | 8,99   | 119,18 | 17,77  | 159,06 | 208,01 | 227,37 | 153,76 |
| Huila    | Colombia              | 17,52  | 34,68  | 0,00  | 50,90  | 92,37  | 99,65  | 254,81 | 178,96 | 209,42 | 111,70 |
| Huila    | Elías                 | 0,00   | 0,00   | 28,15 | 55,40  | 136,13 | 267,31 | 184,07 | 129,37 | 407,12 | 351,05 |
| Huila    | Garzón                | 77,81  | 17,33  | 16,92 | 29,25  | 146,57 | 98,31  | 142,34 | 192,47 | 157,57 | 187,39 |
| Huila    | Gigante               | 0,00   | 0,00   | 23,22 | 42,39  | 25,64  | 40,99  | 164,35 | 161,66 | 90,03  | 144,68 |
| Huila    | Guadalupe             | 71,16  | 96,67  | 52,66 | 82,66  | 157,08 | 154,18 | 165,87 | 234,60 | 150,42 | 327,70 |
| Huila    | Hobo                  | 120,48 | 29,93  | 44,59 | 44,37  | 249,96 | 102,46 | 58,25  | 43,53  | 187,64 | 273,11 |
| Huila    | Iquirá                | 145,16 | 8,90   | 96,13 | 77,24  | 75,86  | 140,71 | 40,65  | 127,82 | 31,41  | 100,32 |
| Huila    | Isnos                 | 188,74 | 0,00   | 55,87 | 55,11  | 7,77   | 68,96  | 177,68 | 100,79 | 25,79  | 116,43 |
| Huila    | La Argentina          | 8,30   | 122,06 | 0,00  | 7,83   | 84,54  | 0,00   | 251,74 | 334,40 | 185,44 | 154,16 |

|            |              |        |        |        |        |        |        |        |        |        |        |
|------------|--------------|--------|--------|--------|--------|--------|--------|--------|--------|--------|--------|
| Huila      | La Plata     | 165,88 | 101,27 | 39,05  | 54,02  | 23,96  | 23,53  | 92,47  | 243,33 | 97,25  | 164,50 |
| Huila      | Nátaga       | 134,61 | 16,72  | 148,96 | 180,86 | 179,42 | 226,39 | 272,57 | 238,63 | 142,00 | 156,52 |
| Huila      | Neiva        | 196,52 | 87,69  | 117,16 | 147,99 | 286,46 | 333,84 | 369,69 | 354,95 | 337,31 | 391,54 |
| Huila      | Oporapa      | 26,52  | 8,64   | 76,01  | 33,05  | 56,57  | 158,10 | 92,78  | 264,63 | 251,42 | 274,77 |
| Huila      | Paicol       | 189,68 | 94,25  | 0,00   | 0,00   | 240,25 | 348,75 | 309,88 | 380,09 | 610,96 | 249,73 |
| Huila      | Palermo      | 273,25 | 132,38 | 37,59  | 13,41  | 157,89 | 142,09 | 253,68 | 177,54 | 195,83 | 159,38 |
| Huila      | Palestina    | 9,51   | 84,59  | 111,42 | 211,09 | 199,38 | 116,47 | 26,54  | 104,99 | 164,29 | 239,52 |
| Huila      | Pital        | 69,24  | 61,14  | 60,77  | 196,24 | 262,62 | 238,45 | 229,60 | 301,63 | 233,83 | 297,71 |
| Huila      | Pitalito     | 159,67 | 48,45  | 49,25  | 62,28  | 168,49 | 283,12 | 249,49 | 249,53 | 204,23 | 198,03 |
| Huila      | Rivera       | 251,26 | 236,60 | 62,71  | 163,31 | 590,00 | 401,61 | 261,10 | 301,22 | 239,41 | 363,27 |
| Huila      | Saladoblanco | 104,86 | 47,11  | 74,48  | 18,41  | 218,68 | 81,02  | 338,71 | 290,98 | 331,47 | 319,49 |
| Huila      | San Agustín  | 135,21 | 6,53   | 12,91  | 15,98  | 12,65  | 78,26  | 340,88 | 380,53 | 465,13 | 578,28 |
| Huila      | Santa María  | 152,82 | 75,56  | 18,70  | 64,78  | 9,16   | 45,33  | 314,49 | 311,22 | 290,80 | 165,94 |
| Huila      | Suaza        | 276,46 | 160,07 | 6,23   | 18,16  | 264,83 | 286,14 | 222,69 | 314,11 | 210,88 | 230,84 |
| Huila      | Tarqui       | 104,56 | 36,51  | 0,00   | 5,96   | 5,90   | 29,21  | 63,67  | 143,38 | 159,05 | 185,78 |
| Huila      | Tello        | 190,42 | 0,00   | 0,00   | 7,23   | 7,19   | 64,42  | 135,26 | 106,25 | 84,54  | 161,14 |
| Huila      | Teruel       | 264,65 | 275,02 | 261,16 | 129,67 | 398,27 | 244,33 | 231,19 | 195,60 | 240,16 | 227,61 |
| Huila      | Tesalia      | 178,63 | 177,78 | 0,00   | 22,04  | 76,85  | 196,83 | 185,06 | 195,44 | 129,77 | 312,50 |
| Huila      | Timaná       | 154,43 | 14,93  | 24,84  | 14,88  | 29,73  | 351,19 | 266,73 | 379,65 | 251,00 | 353,81 |
| Huila      | Villavieja   | 13,59  | 27,21  | 13,62  | 54,51  | 54,58  | 81,87  | 191,07 | 191,36 | 109,41 | 287,08 |
| Huila      | Yaguará      | 348,69 | 61,49  | 48,46  | 23,91  | 23,58  | 325,70 | 263,88 | 351,00 | 335,23 | 253,75 |
| La Guajira | Albania      | 9,04   | 79,17  | 141,55 | 100,43 | 126,70 | 71,95  | 35,20  | 114,96 | 120,27 | 70,11  |
| La Guajira | Barrancas    | 17,81  | 221,25 | 198,14 | 62,07  | 190,86 | 254,23 | 205,69 | 159,53 | 268,64 | 194,95 |
| La Guajira | Dibulla      | 0,00   | 48,11  | 30,73  | 11,05  | 28,28  | 37,36  | 107,79 | 138,41 | 100,05 | 49,73  |
| La Guajira | Distracción  | 0,00   | 0,00   | 0,00   | 50,20  | 13,96  | 34,03  | 46,47  | 32,40  | 25,33  | 80,55  |
| La Guajira | El Molino    | 78,52  | 77,11  | 138,57 | 160,91 | 243,25 | 502,57 | 153,18 | 151,04 | 103,12 | 67,90  |
| La Guajira | Fonseca      | 0,00   | 17,28  | 13,51  | 26,44  | 12,95  | 139,62 | 177,48 | 238,57 | 285,68 | 216,07 |

|            |                    |       |        |        |        |        |        |        |        |        |        |
|------------|--------------------|-------|--------|--------|--------|--------|--------|--------|--------|--------|--------|
| La Guajira | Hatonuevo          | 27,82 | 0,00   | 0,00   | 9,78   | 4,69   | 18,02  | 8,66   | 120,83 | 16,05  | 3,87   |
| La Guajira | La Jagua del Pilar | 0,00  | 0,00   | 33,99  | 100,23 | 229,89 | 0,00   | 0,00   | 0,00   | 93,37  | 122,96 |
| La Guajira | Maicao             | 36,56 | 114,86 | 57,76  | 19,73  | 17,21  | 68,72  | 149,87 | 131,53 | 120,34 | 92,69  |
| La Guajira | Manaure            | 0,00  | 9,02   | 24,65  | 1,18   | 1,13   | 2,17   | 17,69  | 11,00  | 15,39  | 9,26   |
| La Guajira | Riohacha           | 1,08  | 42,11  | 67,20  | 37,07  | 28,33  | 53,53  | 122,43 | 191,42 | 168,41 | 164,49 |
| La Guajira | San Juan del Cesar | 58,49 | 81,15  | 126,31 | 59,68  | 112,46 | 161,24 | 241,76 | 331,06 | 278,62 | 248,50 |
| La Guajira | Uribia             | 0,00  | 0,00   | 4,30   | 4,14   | 2,65   | 12,78  | 23,40  | 14,86  | 6,31   | 6,65   |
| La Guajira | Urumita            | 0,00  | 6,80   | 19,77  | 70,37  | 136,66 | 96,61  | 76,42  | 62,99  | 50,25  | 70,84  |
| La Guajira | Villanueva         | 0,00  | 4,01   | 31,52  | 85,28  | 80,09  | 191,66 | 203,91 | 292,63 | 213,33 | 164,49 |
| Magdalena  | Algarrobo          | 41,87 | 66,59  | 66,18  | 8,22   | 0,00   | 0,00   | 137,11 | 576,92 | 166,98 | 340,00 |
| Magdalena  | Aracataca          | 5,52  | 0,00   | 0,00   | 16,06  | 7,95   | 7,86   | 5,18   | 7,69   | 38,00  | 200,38 |
| Magdalena  | Ariguani           | 0,00  | 12,76  | 0,00   | 12,67  | 66,27  | 12,58  | 78,29  | 156,04 | 143,01 | 176,54 |
| Magdalena  | Cerro San Antonio  | 48,89 | 0,00   | 0,00   | 12,42  | 0,00   | 213,41 | 315,26 | 443,54 | 178,46 | 179,14 |
| Magdalena  | Chivolo            | 0,00  | 0,00   | 30,79  | 37,05  | 99,08  | 285,63 | 342,74 | 849,89 | 676,69 | 326,88 |
| Magdalena  | Ciénaga            | 1,95  | 19,49  | 1,94   | 3,88   | 1,94   | 1,93   | 37,58  | 198,92 | 208,95 | 253,30 |
| Magdalena  | Concordia          | 9,98  | 0,00   | 0,00   | 0,00   | 0,00   | 0,00   | 315,59 | 465,95 | 489,99 | 471,19 |
| Magdalena  | El Banco           | 41,92 | 23,68  | 16,38  | 9,09   | 32,68  | 30,81  | 85,02  | 74,00  | 142,27 | 159,89 |
| Magdalena  | El Piñon           | 0,00  | 0,00   | 0,00   | 0,00   | 83,27  | 720,45 | 262,36 | 256,61 | 232,81 | 340,46 |
| Magdalena  | El Retén           | 0,00  | 0,00   | 0,00   | 0,00   | 0,00   | 0,00   | 14,63  | 0,00   | 104,86 | 734,88 |
| Magdalena  | Fundación          | 12,26 | 5,25   | 8,75   | 1,75   | 8,75   | 15,74  | 19,22  | 8,73   | 62,78  | 169,00 |
| Magdalena  | Guamal             | 0,00  | 0,00   | 0,00   | 11,45  | 60,63  | 82,73  | 194,01 | 207,22 | 187,14 | 127,24 |
| Magdalena  | Nueva Granada      | 17,85 | 0,00   | 5,72   | 5,61   | 10,99  | 26,92  | 79,12  | 61,97  | 5,05   | 54,42  |
| Magdalena  | Pedraza            | 0,00  | 0,00   | 0,00   | 0,00   | 37,37  | 0,00   | 0,00   | 24,84  | 148,77 | 396,09 |
| Magdalena  | Pijiño del Carmen  | 6,95  | 0,00   | 6,81   | 6,73   | 53,28  | 138,28 | 188,77 | 334,25 | 177,68 | 181,72 |
| Magdalena  | Pivijay            | 2,81  | 0,00   | 5,70   | 5,73   | 8,64   | 142,02 | 306,01 | 246,23 | 247,61 | 204,43 |
| Magdalena  | Plato              | 19,70 | 1,94   | 7,63   | 0,00   | 101,58 | 181,70 | 153,69 | 86,13  | 174,60 | 139,40 |
| Magdalena  | Puebloviejo        | 0,00  | 0,00   | 7,38   | 0,00   | 0,00   | 0,00   | 105,84 | 311,36 | 269,19 | 312,22 |

|           |                             |       |        |        |        |        |        |        |        |        |        |
|-----------|-----------------------------|-------|--------|--------|--------|--------|--------|--------|--------|--------|--------|
| Magdalena | Remolino                    | 0,00  | 0,00   | 0,00   | 11,86  | 0,00   | 36,07  | 157,29 | 182,66 | 0,00   | 61,77  |
| Magdalena | Sabanas de San Angel        | 97,92 | 12,90  | 12,74  | 18,90  | 0,00   | 30,77  | 60,80  | 174,21 | 456,57 | 134,60 |
| Magdalena | Salamina                    | 0,00  | 25,17  | 25,60  | 13,00  | 0,00   | 80,71  | 245,77 | 263,85 | 324,45 | 515,39 |
| Magdalena | San Sebastián de Buenavista | 11,56 | 5,77   | 0,00   | 17,28  | 0,00   | 0,00   | 28,68  | 40,10  | 245,95 | 211,31 |
| Magdalena | San Zenón                   | 0,00  | 0,00   | 0,00   | 0,00   | 188,49 | 66,37  | 485,54 | 440,33 | 417,26 | 339,54 |
| Magdalena | Santa Ana                   | 4,22  | 0,00   | 8,27   | 0,00   | 0,00   | 99,86  | 90,81  | 308,26 | 200,48 | 228,51 |
| Magdalena | Santa Bárbara de Pinto      | 70,21 | 0,00   | 0,00   | 8,45   | 0,00   | 24,74  | 97,69  | 200,93 | 428,23 | 242,70 |
| Magdalena | Santa Marta                 | 69,16 | 54,08  | 24,03  | 25,67  | 40,45  | 67,11  | 138,36 | 211,80 | 145,50 | 183,10 |
| Magdalena | Sitionuevo                  | 0,00  | 0,00   | 0,00   | 0,00   | 0,00   | 0,00   | 42,09  | 41,53  | 44,16  | 68,56  |
| Magdalena | Tenerife                    | 0,00  | 48,27  | 72,63  | 48,55  | 16,22  | 24,39  | 73,30  | 261,16 | 204,20 | 155,36 |
| Magdalena | Zapayán                     | 0,00  | 0,00   | 0,00   | 0,00   | 0,00   | 137,35 | 251,46 | 113,83 | 90,90  | 226,22 |
| Magdalena | Zona Bananera               | 0,00  | 5,18   | 0,00   | 1,71   | 0,00   | 11,80  | 83,75  | 188,01 | 211,49 | 260,91 |
| Meta      | Acacías                     | 1,76  | 39,41  | 242,41 | 114,21 | 46,20  | 160,22 | 331,31 | 331,12 | 287,42 | 317,87 |
| Meta      | Barranca de Upía            | 0,00  | 29,25  | 57,31  | 28,18  | 275,94 | 297,06 | 238,66 | 571,28 | 382,07 | 349,39 |
| Meta      | Cabuyaro                    | 0,00  | 159,49 | 78,99  | 208,71 | 154,80 | 281,55 | 253,10 | 351,67 | 572,42 | 568,18 |
| Meta      | Castilla la Nueva           | 0,00  | 141,42 | 62,34  | 108,88 | 305,02 | 489,36 | 629,49 | 546,45 | 551,39 | 495,00 |
| Meta      | Cubarral                    | 0,00  | 0,00   | 0,00   | 90,11  | 141,89 | 69,97  | 344,95 | 459,42 | 470,90 | 298,51 |
| Meta      | Cumaral                     | 0,00  | 70,45  | 17,46  | 28,85  | 62,94  | 34,05  | 411,13 | 592,34 | 577,14 | 550,96 |
| Meta      | El Calvario                 | 0,00  | 131,69 | 0,00   | 0,00   | 133,04 | 132,80 | 0,00   | 88,69  | 0,00   | 0,00   |
| Meta      | El Castillo                 | 0,00  | 178,17 | 299,13 | 165,91 | 30,39  | 91,91  | 247,37 | 327,36 | 298,65 | 539,60 |
| Meta      | El Dorado                   | 0,00  | 119,69 | 59,58  | 0,00   | 0,00   | 29,44  | 762,69 | 760,46 | 554,10 | 611,00 |
| Meta      | Fuente de Oro               | 0,00  | 0,00   | 83,64  | 131,47 | 338,93 | 230,09 | 335,31 | 444,85 | 256,35 | 341,45 |
| Meta      | Granada                     | 1,91  | 63,37  | 47,40  | 17,84  | 20,95  | 97,43  | 249,42 | 265,73 | 199,33 | 209,61 |
| Meta      | Guamal                      | 11,13 | 0,00   | 66,06  | 21,87  | 97,89  | 378,75 | 258,56 | 686,55 | 469,78 | 361,59 |
| Meta      | La Macarena                 | 3,87  | 11,24  | 21,81  | 7,05   | 30,79  | 66,41  | 90,28  | 78,30  | 79,12  | 41,41  |
| Meta      | Lejanías                    | 0,00  | 10,48  | 10,49  | 0,00   | 0,00   | 94,96  | 169,22 | 392,07 | 372,22 | 448,05 |
| Meta      | Mapiripán                   | 0,00  | 0,00   | 74,37  | 13,17  | 70,61  | 50,07  | 61,02  | 53,54  | 17,41  | 11,32  |

|        |                      |        |        |        |        |        |        |        |        |         |         |
|--------|----------------------|--------|--------|--------|--------|--------|--------|--------|--------|---------|---------|
| Meta   | Mesetas              | 0,00   | 64,52  | 18,34  | 0,00   | 9,06   | 0,00   | 215,05 | 231,77 | 230,35  | 167,34  |
| Meta   | Puerto Concordia     | 0,00   | 11,54  | 11,23  | 27,32  | 10,64  | 72,48  | 141,22 | 78,58  | 28,71   | 32,65   |
| Meta   | Puerto Gaitán        | 5,68   | 22,56  | 16,80  | 22,26  | 77,40  | 170,26 | 218,28 | 341,63 | 301,79  | 283,76  |
| Meta   | Puerto Lleras        | 0,00   | 323,90 | 9,60   | 9,68   | 9,78   | 59,19  | 269,00 | 241,76 | 162,98  | 175,11  |
| Meta   | Puerto López         | 6,72   | 178,58 | 71,63  | 51,31  | 53,72  | 56,06  | 285,70 | 327,35 | 337,92  | 339,69  |
| Meta   | Puerto Rico          | 0,00   | 0,00   | 44,50  | 105,05 | 27,46  | 32,77  | 141,17 | 91,81  | 91,27   | 90,90   |
| Meta   | Restrepo             | 0,00   | 9,68   | 19,27  | 0,00   | 47,76  | 199,79 | 929,44 | 955,44 | 1179,36 | 1053,82 |
| Meta   | San Carlos de Guaroa | 14,06  | 13,53  | 0,00   | 12,56  | 0,00   | 326,19 | 438,05 | 400,48 | 459,24  | 382,37  |
| Meta   | San Juan de Arama    | 0,00   | 76,91  | 187,60 | 199,47 | 0,00   | 223,51 | 359,11 | 326,80 | 362,11  | 272,73  |
| Meta   | San Juanito          | 51,89  | 0,00   | 50,03  | 49,50  | 0,00   | 288,74 | 190,02 | 234,30 | 92,38   | 0,00    |
| Meta   | San Martín           | 0,00   | 13,44  | 66,16  | 143,35 | 42,80  | 198,36 | 341,27 | 377,78 | 364,82  | 380,12  |
| Meta   | Uribe                | 0,00   | 14,75  | 7,19   | 0,00   | 0,00   | 6,66   | 32,50  | 69,74  | 30,95   | 18,14   |
| Meta   | Villavicencio        | 3,00   | 42,11  | 93,80  | 98,95  | 158,60 | 213,25 | 294,96 | 285,58 | 248,93  | 244,13  |
| Meta   | Vistahermosa         | 0,00   | 53,50  | 0,00   | 4,30   | 54,84  | 49,68  | 113,89 | 159,80 | 137,47  | 154,39  |
| Nariño | Alban                | 181,48 | 29,81  | 14,70  | 38,67  | 38,13  | 84,63  | 69,58  | 73,23  | 140,08  | 84,74   |
| Nariño | Aldana               | 223,88 | 45,30  | 30,54  | 201,02 | 218,85 | 348,10 | 288,65 | 389,42 | 394,41  | 283,14  |
| Nariño | Ancuyá               | 0,00   | 36,05  | 49,15  | 25,12  | 0,00   | 65,73  | 471,44 | 303,49 | 550,61  | 955,83  |
| Nariño | Arboleda             | 26,78  | 53,48  | 0,00   | 119,95 | 292,83 | 398,78 | 398,25 | 251,92 | 304,64  | 211,70  |
| Nariño | Barbacoas            | 31,56  | 200,60 | 129,85 | 714,58 | 60,65  | 76,26  | 110,45 | 140,40 | 87,18   | 62,00   |
| Nariño | Belén                | 44,38  | 87,59  | 0,00   | 0,00   | 0,00   | 13,83  | 40,97  | 121,31 | 279,33  | 144,51  |
| Nariño | Buesaco              | 0,00   | 8,68   | 34,30  | 42,37  | 184,20 | 186,11 | 273,85 | 306,86 | 179,55  | 402,18  |
| Nariño | Chachagüí            | 46,11  | 45,75  | 7,57   | 0,00   | 59,67  | 251,78 | 264,59 | 438,21 | 399,01  | 345,92  |
| Nariño | Colón                | 153,45 | 40,71  | 121,68 | 10,09  | 10,04  | 99,95  | 179,07 | 79,33  | 187,62  | 245,87  |
| Nariño | Consaca              | 276,65 | 39,87  | 241,40 | 172,55 | 92,22  | 20,67  | 250,47 | 548,23 | 255,70  | 623,92  |
| Nariño | Contadero            | 104,06 | 44,46  | 14,74  | 29,36  | 29,24  | 160,00 | 275,52 | 490,97 | 373,89  | 516,28  |
| Nariño | Córdoba              | 95,39  | 0,00   | 0,00   | 0,00   | 0,00   | 115,20 | 143,55 | 207,59 | 385,55  | 349,08  |
| Nariño | Cuaspu               | 0,00   | 12,12  | 84,27  | 71,87  | 107,21 | 165,74 | 105,94 | 198,92 | 162,94  | 185,08  |

|        |                    |        |       |       |        |        |        |        |        |        |        |
|--------|--------------------|--------|-------|-------|--------|--------|--------|--------|--------|--------|--------|
| Nariño | Cumbal             | 117,94 | 30,43 | 5,96  | 5,85   | 8,61   | 92,85  | 71,78  | 113,74 | 138,17 | 203,40 |
| Nariño | Cumbitara          | 24,78  | 16,06 | 54,58 | 22,73  | 88,30  | 21,46  | 34,76  | 67,54  | 72,18  | 44,64  |
| Nariño | El Charco          | 10,84  | 0,00  | 0,00  | 3,25   | 50,14  | 51,38  | 34,99  | 75,94  | 29,85  | 39,26  |
| Nariño | El Peñol           | 29,54  | 29,67 | 0,00  | 0,00   | 45,17  | 287,18 | 395,08 | 336,44 | 323,08 | 309,21 |
| Nariño | El Rosario         | 0,00   | 9,05  | 9,14  | 0,00   | 0,00   | 28,37  | 133,91 | 154,99 | 9,80   | 39,75  |
| Nariño | El Tablón de Gómez | 7,28   | 0,00  | 0,00  | 0,00   | 0,00   | 7,62   | 153,81 | 225,14 | 250,84 | 229,61 |
| Nariño | El Tambo           | 138,08 | 0,00  | 37,39 | 204,76 | 361,37 | 343,29 | 166,17 | 257,07 | 171,14 | 380,61 |
| Nariño | Francisco Pizarro  | 0,00   | 0,00  | 0,00  | 0,00   | 15,02  | 0,00   | 98,99  | 75,42  | 19,95  | 0,00   |
| Nariño | Funes              | 0,00   | 58,49 | 0,00  | 74,25  | 104,71 | 210,68 | 485,36 | 473,57 | 400,12 | 371,98 |
| Nariño | Guachucal          | 36,16  | 0,00  | 48,85 | 18,45  | 24,76  | 343,13 | 502,77 | 380,16 | 319,45 | 469,70 |
| Nariño | Guaitarilla        | 67,60  | 38,00 | 46,19 | 0,00   | 23,69  | 136,02 | 137,82 | 238,37 | 183,17 | 185,73 |
| Nariño | Gualmatán          | 70,20  | 0,00  | 52,46 | 0,00   | 52,28  | 174,00 | 243,31 | 138,86 | 69,36  | 190,54 |
| Nariño | Iles               | 87,72  | 12,40 | 0,00  | 0,00   | 11,99  | 23,71  | 23,48  | 11,61  | 91,94  | 113,82 |
| Nariño | Imués              | 41,57  | 0,00  | 14,35 | 0,00   | 163,67 | 197,03 | 107,97 | 283,15 | 224,50 | 326,21 |
| Nariño | Ipiales            | 61,95  | 11,92 | 62,30 | 88,37  | 117,94 | 136,83 | 164,61 | 242,73 | 263,20 | 329,90 |
| Nariño | La Cruz            | 146,14 | 89,57 | 0,00  | 16,67  | 16,62  | 11,05  | 77,16  | 175,97 | 170,14 | 328,79 |
| Nariño | La Florida         | 9,15   | 9,35  | 0,00  | 9,71   | 29,66  | 50,24  | 142,78 | 144,75 | 209,31 | 169,24 |
| Nariño | La Llanada         | 0,00   | 0,00  | 63,76 | 64,54  | 0,00   | 49,63  | 318,26 | 458,09 | 172,03 | 523,93 |
| Nariño | La Tola            | 43,97  | 42,22 | 40,56 | 97,55  | 65,53  | 44,92  | 146,67 | 57,98  | 0,00   | 0,00   |
| Nariño | La Unión           | 217,87 | 21,93 | 7,36  | 55,55  | 171,52 | 503,02 | 412,00 | 624,41 | 502,34 | 598,78 |
| Nariño | Leiva              | 24,56  | 0,00  | 0,00  | 0,00   | 7,67   | 7,55   | 29,74  | 65,86  | 72,21  | 7,11   |
| Nariño | Linares            | 8,73   | 8,86  | 0,00  | 0,00   | 18,60  | 189,18 | 327,11 | 420,54 | 298,75 | 354,29 |
| Nariño | Los Andes          | 11,88  | 17,50 | 0,00  | 45,03  | 5,53   | 135,85 | 181,45 | 136,28 | 417,22 | 207,36 |
| Nariño | Magüi              | 5,71   | 11,07 | 16,11 | 36,44  | 10,09  | 4,89   | 23,71  | 18,39  | 44,57  | 4,32   |
| Nariño | Mallama            | 134,23 | 11,37 | 69,47 | 58,87  | 23,99  | 36,63  | 99,45  | 316,58 | 193,42 | 249,74 |
| Nariño | Mosquera           | 47,00  | 7,60  | 0,00  | 21,45  | 0,00   | 40,34  | 78,29  | 82,27  | 18,44  | 23,85  |
| Nariño | Nariño             | 23,24  | 22,85 | 22,50 | 44,27  | 21,81  | 0,00   | 84,66  | 291,97 | 328,54 | 709,36 |

|                    |                      |        |       |       |        |        |        |        |        |        |        |
|--------------------|----------------------|--------|-------|-------|--------|--------|--------|--------|--------|--------|--------|
| Nariño             | Olaya Herrera        | 24,81  | 0,00  | 17,27 | 0,00   | 74,06  | 6,65   | 85,37  | 139,47 | 147,42 | 164,59 |
| Nariño             | Ospina               | 0,00   | 0,00  | 35,49 | 0,00   | 11,70  | 151,34 | 381,94 | 426,32 | 206,59 | 331,16 |
| Nariño             | Pasto                | 113,63 | 15,75 | 86,97 | 53,44  | 101,56 | 156,42 | 244,58 | 358,58 | 377,96 | 418,27 |
| Nariño             | Policarpa            | 180,89 | 0,00  | 6,68  | 13,10  | 25,67  | 56,64  | 18,51  | 60,55  | 41,58  | 99,07  |
| Nariño             | Potosí               | 162,14 | 15,57 | 86,39 | 95,12  | 79,83  | 48,29  | 154,07 | 196,13 | 197,74 | 249,29 |
| Nariño             | Providencia          | 0,00   | 8,21  | 0,00  | 8,01   | 15,82  | 54,70  | 46,31  | 122,04 | 60,35  | 104,38 |
| Nariño             | Puerres              | 101,47 | 11,35 | 34,25 | 23,00  | 46,32  | 58,34  | 164,32 | 343,24 | 107,35 | 240,41 |
| Nariño             | Pupiales             | 5,37   | 37,37 | 21,24 | 5,28   | 5,26   | 203,95 | 182,07 | 0,00   | 30,95  | 313,14 |
| Nariño             | Ricaurte             | 51,24  | 0,00  | 0,00  | 0,00   | 0,00   | 85,84  | 218,34 | 158,86 | 48,22  | 136,28 |
| Nariño             | Roberto Payán        | 0,00   | 0,00  | 0,00  | 5,11   | 0,00   | 0,00   | 4,69   | 4,55   | 0,00   | 0,00   |
| Nariño             | Samaniego            | 47,75  | 9,97  | 21,96 | 0,00   | 62,12  | 164,61 | 126,69 | 120,88 | 157,43 | 234,57 |
| Nariño             | San Andres de Tumaco | 1,19   | 2,34  | 1,71  | 1,12   | 8,74   | 52,92  | 94,66  | 92,62  | 74,63  | 71,09  |
| Nariño             | San Bernardo         | 72,39  | 19,15 | 30,99 | 36,11  | 5,84   | 124,83 | 154,30 | 155,31 | 78,12  | 136,61 |
| Nariño             | San Lorenzo          | 42,85  | 10,63 | 36,92 | 5,23   | 36,34  | 56,67  | 133,02 | 187,80 | 171,29 | 304,97 |
| Nariño             | San Pablo            | 44,41  | 22,27 | 16,76 | 5,60   | 0,00   | 101,63 | 204,08 | 193,54 | 177,22 | 5,75   |
| Nariño             | San Pedro de Cartago | 139,86 | 41,67 | 41,34 | 13,69  | 95,26  | 148,81 | 362,56 | 413,77 | 265,29 | 289,93 |
| Nariño             | Sandoná              | 130,20 | 31,49 | 47,14 | 109,79 | 66,54  | 308,74 | 308,30 | 296,23 | 311,47 | 556,23 |
| Nariño             | Santa Bárbara        | 6,58   | 6,61  | 6,63  | 0,00   | 6,67   | 6,69   | 26,89  | 33,74  | 0,00   | 6,81   |
| Nariño             | Santacruz            | 18,19  | 0,00  | 4,27  | 4,14   | 16,07  | 0,00   | 22,65  | 18,30  | 35,50  | 68,81  |
| Nariño             | Sapuyes              | 83,08  | 42,11 | 57,00 | 0,00   | 0,00   | 104,77 | 228,14 | 278,59 | 110,15 | 272,57 |
| Nariño             | Taminango            | 78,68  | 16,56 | 48,80 | 106,52 | 209,29 | 102,73 | 171,55 | 218,07 | 116,86 | 129,17 |
| Nariño             | Tangua               | 0,00   | 9,52  | 0,00  | 0,00   | 9,87   | 159,95 | 161,98 | 133,22 | 186,94 | 315,59 |
| Nariño             | Túquerres            | 77,56  | 24,28 | 46,20 | 9,75   | 21,97  | 136,98 | 191,21 | 203,94 | 140,40 | 182,73 |
| Nariño             | Yacuanquer           | 19,65  | 48,66 | 38,54 | 57,27  | 56,70  | 252,86 | 408,20 | 422,68 | 364,70 | 280,19 |
| Norte de Santander | Abrego               | 34,11  | 2,82  | 25,10 | 8,28   | 103,93 | 100,19 | 104,62 | 98,30  | 126,33 | 125,12 |
| Norte de Santander | Arboledas            | 65,54  | 32,88 | 11,00 | 11,02  | 121,57 | 265,60 | 221,80 | 111,12 | 345,06 | 211,77 |
| Norte de Santander | Bochalema            | 30,07  | 44,87 | 0,00  | 0,00   | 44,08  | 481,82 | 304,52 | 403,81 | 516,28 | 413,11 |

|                    |                  |        |        |        |        |        |        |        |        |        |        |
|--------------------|------------------|--------|--------|--------|--------|--------|--------|--------|--------|--------|--------|
| Norte de Santander | Bucarasica       | 43,85  | 0,00   | 175,21 | 87,74  | 43,87  | 43,81  | 218,87 | 175,17 | 87,53  | 21,88  |
| Norte de Santander | Cachirá          | 18,70  | 27,99  | 0,00   | 0,00   | 64,71  | 64,48  | 174,41 | 137,32 | 127,62 | 208,94 |
| Norte de Santander | Cácota           | 164,27 | 84,75  | 86,96  | 0,00   | 276,50 | 190,39 | 440,10 | 654,91 | 363,64 | 747,46 |
| Norte de Santander | Chinácota        | 132,69 | 118,29 | 65,03  | 19,31  | 490,54 | 485,56 | 205,99 | 321,38 | 360,90 | 320,96 |
| Norte de Santander | Chitagá          | 29,36  | 29,30  | 19,50  | 9,73   | 19,42  | 67,85  | 58,06  | 28,97  | 134,97 | 538,93 |
| Norte de Santander | Convención       | 100,71 | 173,35 | 65,48  | 0,00   | 252,06 | 347,39 | 333,17 | 383,09 | 294,79 | 278,28 |
| Norte de Santander | Cúcuta           | 118,52 | 0,83   | 39,86  | 65,33  | 170,01 | 303,03 | 300,64 | 288,19 | 275,53 | 256,71 |
| Norte de Santander | Cucutilla        | 24,19  | 0,00   | 12,34  | 0,00   | 176,19 | 114,18 | 191,91 | 322,54 | 377,31 | 183,61 |
| Norte de Santander | Durania          | 312,73 | 0,00   | 24,75  | 25,09  | 127,06 | 565,70 | 832,25 | 420,50 | 345,01 | 455,15 |
| Norte de Santander | El Carmen        | 126,09 | 6,40   | 110,55 | 19,80  | 93,89  | 95,40  | 221,41 | 224,92 | 299,89 | 246,56 |
| Norte de Santander | El Tarra         | 27,80  | 9,26   | 27,73  | 18,47  | 73,71  | 45,95  | 82,57  | 219,78 | 410,70 | 209,59 |
| Norte de Santander | El Zulia         | 110,70 | 4,76   | 122,26 | 41,82  | 151,61 | 86,21  | 174,85 | 381,05 | 267,04 | 393,82 |
| Norte de Santander | Gramalote        | 0,00   | 0,00   | 66,64  | 50,61  | 0,00   | 17,30  | 35,06  | 35,40  | 125,74 | 163,28 |
| Norte de Santander | Hacarí           | 0,00   | 0,00   | 77,60  | 48,25  | 48,00  | 19,10  | 161,41 | 122,72 | 150,14 | 251,82 |
| Norte de Santander | Herrán           | 91,16  | 92,02  | 0,00   | 23,49  | 0,00   | 47,89  | 48,37  | 48,84  | 24,72  | 224,66 |
| Norte de Santander | La Esperanza     | 26,87  | 8,87   | 8,79   | 43,63  | 8,65   | 222,72 | 195,08 | 117,67 | 66,60  | 90,74  |
| Norte de Santander | La Playa         | 47,41  | 59,14  | 59,01  | 70,69  | 164,65 | 93,94  | 117,27 | 187,42 | 105,31 | 151,99 |
| Norte de Santander | Labateca         | 273,79 | 51,35  | 273,93 | 17,12  | 85,56  | 153,90 | 68,34  | 392,56 | 119,31 | 238,26 |
| Norte de Santander | Los Patios       | 141,91 | 175,77 | 239,79 | 136,46 | 224,04 | 417,90 | 348,34 | 433,98 | 375,01 | 325,27 |
| Norte de Santander | Lourdes          | 29,18  | 0,00   | 0,00   | 0,00   | 117,89 | 59,12  | 236,83 | 118,73 | 178,31 | 118,98 |
| Norte de Santander | Mutiscua         | 0,00   | 0,00   | 78,06  | 0,00   | 26,17  | 184,21 | 52,69  | 185,73 | 53,21  | 53,38  |
| Norte de Santander | Ocaña            | 15,20  | 30,15  | 65,14  | 37,07  | 175,44 | 189,67 | 247,10 | 239,03 | 291,16 | 281,84 |
| Norte de Santander | Pamplona         | 149,91 | 14,69  | 27,33  | 3,62   | 166,88 | 277,81 | 304,05 | 412,40 | 449,53 | 482,67 |
| Norte de Santander | Pamplonita       | 41,49  | 0,00   | 123,71 | 0,00   | 61,50  | 102,21 | 265,04 | 121,98 | 364,96 | 121,33 |
| Norte de Santander | Puerto Santander | 11,10  | 0,00   | 0,00   | 10,58  | 20,80  | 194,53 | 271,82 | 89,21  | 126,84 | 86,36  |
| Norte de Santander | Ragonvalia       | 14,66  | 14,63  | 14,61  | 14,59  | 14,58  | 116,47 | 116,33 | 130,74 | 29,02  | 391,47 |
| Norte de Santander | Salazar          | 96,66  | 10,80  | 21,71  | 0,00   | 186,30 | 341,33 | 254,26 | 322,04 | 457,39 | 279,58 |



|                    |                   |        |        |        |        |        |        |        |        |        |        |
|--------------------|-------------------|--------|--------|--------|--------|--------|--------|--------|--------|--------|--------|
| Norte de Santander | San Calixto       | 23,56  | 23,41  | 7,75   | 69,27  | 152,81 | 45,50  | 52,66  | 67,16  | 44,40  | 66,03  |
| Norte de Santander | San Cayetano      | 43,01  | 0,00   | 207,04 | 0,00   | 159,46 | 351,84 | 325,55 | 319,25 | 239,68 | 198,66 |
| Norte de Santander | Santiago          | 110,66 | 0,00   | 255,85 | 36,36  | 144,51 | 143,73 | 250,09 | 249,91 | 141,69 | 386,78 |
| Norte de Santander | Sardinata         | 44,02  | 48,45  | 101,33 | 8,82   | 83,79  | 52,94  | 220,70 | 189,90 | 110,46 | 84,00  |
| Norte de Santander | Silos             | 0,00   | 0,00   | 40,41  | 20,53  | 20,94  | 85,00  | 108,34 | 154,29 | 224,97 | 206,14 |
| Norte de Santander | Teorama           | 0,00   | 0,00   | 15,80  | 15,48  | 70,74  | 59,36  | 53,30  | 52,17  | 55,75  | 86,45  |
| Norte de Santander | Tibú              | 48,51  | 8,52   | 36,75  | 64,71  | 162,36 | 139,24 | 180,03 | 195,57 | 175,33 | 198,87 |
| Norte de Santander | Toledo            | 98,41  | 0,00   | 5,79   | 17,36  | 190,99 | 109,96 | 590,28 | 671,26 | 416,59 | 358,71 |
| Norte de Santander | Villa Caro        | 0,00   | 0,00   | 19,58  | 58,56  | 0,00   | 116,46 | 116,14 | 57,93  | 192,60 | 288,24 |
| Norte de Santander | Villa del Rosario | 159,75 | 10,67  | 15,63  | 52,13  | 304,23 | 424,50 | 347,10 | 356,40 | 328,95 | 318,08 |
| Putumayo           | Colón             | 114,92 | 0,00   | 18,92  | 0,00   | 167,97 | 92,78  | 276,40 | 200,91 | 380,50 | 468,13 |
| Putumayo           | Leguízamo         | 144,86 | 120,24 | 133,48 | 25,53  | 115,29 | 302,02 | 457,56 | 445,79 | 304,31 | 291,89 |
| Putumayo           | Mocoa             | 157,57 | 275,74 | 231,90 | 176,33 | 397,89 | 351,17 | 278,47 | 508,43 | 499,12 | 594,66 |
| Putumayo           | Orito             | 159,61 | 54,46  | 98,45  | 113,48 | 165,01 | 135,57 | 239,97 | 229,30 | 262,46 | 269,72 |
| Putumayo           | Puerto Asís       | 49,70  | 102,29 | 78,85  | 43,48  | 108,71 | 191,63 | 135,71 | 246,96 | 300,97 | 228,65 |
| Putumayo           | Puerto Caicedo    | 14,02  | 258,85 | 97,72  | 55,70  | 104,16 | 235,44 | 82,85  | 165,20 | 308,75 | 143,60 |
| Putumayo           | Puerto Guzmán     | 17,51  | 56,69  | 21,72  | 0,00   | 17,24  | 8,58   | 59,76  | 25,47  | 25,32  | 83,91  |
| Putumayo           | San Francisco     | 72,84  | 29,03  | 43,37  | 14,39  | 0,00   | 28,55  | 184,95 | 212,49 | 127,06 | 238,76 |
| Putumayo           | San Miguel        | 57,29  | 173,06 | 33,95  | 129,05 | 106,17 | 128,17 | 117,76 | 130,77 | 131,82 | 191,77 |
| Putumayo           | Santiago          | 10,57  | 20,87  | 41,20  | 0,00   | 40,19  | 39,71  | 78,49  | 184,27 | 230,15 | 265,53 |
| Putumayo           | Sibundoy          | 81,83  | 7,39   | 7,34   | 7,30   | 58,01  | 57,65  | 214,85 | 391,46 | 304,19 | 274,20 |
| Putumayo           | Valle del Guamuez | 111,92 | 161,06 | 31,31  | 2,06   | 77,12  | 88,12  | 152,23 | 236,25 | 156,24 | 114,39 |
| Putumayo           | Villagarzón       | 67,23  | 191,92 | 91,07  | 134,07 | 172,19 | 167,05 | 209,48 | 318,00 | 293,37 | 282,82 |
| Quindío            | Armenia           | 2,46   | 4,90   | 76,92  | 33,58  | 177,29 | 284,89 | 386,57 | 403,87 | 345,15 | 369,22 |
| Quindío            | Buenavista        | 230,64 | 0,00   | 33,50  | 0,00   | 238,34 | 274,82 | 207,90 | 699,55 | 458,88 | 534,76 |
| Quindío            | Calarca           | 1,34   | 0,00   | 31,90  | 17,19  | 23,68  | 426,62 | 460,82 | 555,69 | 521,89 | 559,07 |
| Quindío            | Circasia          | 3,58   | 0,00   | 17,59  | 31,40  | 543,20 | 490,57 | 449,09 | 694,96 | 642,20 | 723,22 |

|           |                     |        |        |        |        |        |        |        |        |        |        |
|-----------|---------------------|--------|--------|--------|--------|--------|--------|--------|--------|--------|--------|
| Quindío   | Córdoba             | 0,00   | 0,00   | 204,38 | 242,18 | 37,36  | 205,80 | 206,57 | 583,04 | 603,20 | 679,76 |
| Quindío   | Filandia            | 0,00   | 22,95  | 152,51 | 151,93 | 454,13 | 218,79 | 262,96 | 419,26 | 685,95 | 712,96 |
| Quindío   | Génova              | 0,00   | 0,00   | 168,73 | 160,66 | 117,10 | 95,47  | 559,27 | 408,72 | 618,61 | 527,53 |
| Quindío   | La Tebaida          | 0,00   | 0,00   | 8,17   | 29,27  | 200,29 | 111,85 | 556,56 | 538,99 | 464,86 | 412,43 |
| Quindío   | Montenegro          | 0,00   | 4,96   | 9,89   | 22,17  | 319,15 | 506,47 | 485,25 | 568,62 | 418,98 | 470,58 |
| Quindío   | Pijao               | 0,00   | 0,00   | 15,49  | 31,25  | 471,77 | 698,41 | 336,38 | 725,46 | 570,13 | 754,47 |
| Quindío   | Quimbaya            | 0,00   | 0,00   | 5,81   | 8,69   | 326,55 | 625,59 | 439,95 | 610,98 | 463,55 | 479,51 |
| Quindío   | Salento             | 0,00   | 97,30  | 69,66  | 41,86  | 405,08 | 168,09 | 140,27 | 365,37 | 463,81 | 562,67 |
| Risaralda | Apía                | 95,49  | 44,57  | 55,24  | 175,35 | 228,26 | 302,05 | 326,34 | 281,33 | 247,60 | 256,16 |
| Risaralda | Balboa              | 47,28  | 0,00   | 31,58  | 0,00   | 0,00   | 78,89  | 457,99 | 442,48 | 173,61 | 410,68 |
| Risaralda | Belén de Umbría     | 198,39 | 209,24 | 165,94 | 227,26 | 288,62 | 335,43 | 389,57 | 375,11 | 270,58 | 331,84 |
| Risaralda | Dosquebradas        | 48,57  | 72,89  | 87,09  | 124,79 | 202,54 | 219,66 | 270,80 | 275,74 | 223,25 | 305,23 |
| Risaralda | Guática             | 102,11 | 159,98 | 224,65 | 205,91 | 225,94 | 278,39 | 305,27 | 384,26 | 339,65 | 301,34 |
| Risaralda | La Celia            | 57,29  | 160,72 | 126,66 | 80,67  | 207,88 | 185,06 | 23,17  | 197,33 | 279,36 | 338,00 |
| Risaralda | La Virginia         | 66,84  | 3,17   | 6,33   | 18,95  | 274,20 | 600,48 | 605,28 | 534,93 | 558,73 | 470,23 |
| Risaralda | Marsella            | 68,78  | 0,00   | 13,54  | 161,07 | 306,26 | 299,30 | 440,89 | 411,18 | 441,98 | 463,75 |
| Risaralda | Mistrató            | 104,39 | 12,97  | 167,67 | 25,63  | 25,46  | 18,97  | 12,55  | 168,19 | 24,71  | 128,69 |
| Risaralda | Pereira             | 99,09  | 171,76 | 138,84 | 148,77 | 197,10 | 249,02 | 281,03 | 323,43 | 285,34 | 287,92 |
| Risaralda | Pueblo Rico         | 0,00   | 0,00   | 56,37  | 119,51 | 118,27 | 85,77  | 161,92 | 137,14 | 165,50 | 141,18 |
| Risaralda | Quinchía            | 131,78 | 146,57 | 134,44 | 95,50  | 32,78  | 119,04 | 231,79 | 359,03 | 355,48 | 369,65 |
| Risaralda | Santa Rosa de Cabal | 83,75  | 31,12  | 124,07 | 151,76 | 147,10 | 68,43  | 199,14 | 341,55 | 328,12 | 403,13 |
| Risaralda | Santuario           | 135,76 | 77,44  | 25,76  | 0,00   | 115,47 | 275,46 | 440,87 | 465,44 | 502,51 | 399,97 |
| Santander | Aguada              | 97,13  | 0,00   | 0,00   | 0,00   | 0,00   | 103,79 | 52,49  | 320,00 | 377,36 | 164,02 |
| Santander | Albania             | 21,79  | 0,00   | 0,00   | 20,95  | 20,69  | 0,00   | 40,31  | 59,75  | 78,49  | 174,35 |
| Santander | Aratoca             | 0,00   | 0,00   | 23,91  | 11,96  | 95,82  | 311,75 | 408,11 | 228,31 | 276,71 | 421,64 |
| Santander | Barbosa             | 60,20  | 152,74 | 184,41 | 233,82 | 224,43 | 462,75 | 387,46 | 461,46 | 467,96 | 474,49 |
| Santander | Barichara           | 118,89 | 39,88  | 13,37  | 429,70 | 135,30 | 149,62 | 465,37 | 605,98 | 429,66 | 586,10 |

|           |                      |        |        |        |         |        |        |        |        |        |        |
|-----------|----------------------|--------|--------|--------|---------|--------|--------|--------|--------|--------|--------|
| Santander | Barrancabermeja      | 0,52   | 1,57   | 16,20  | 106,53  | 324,59 | 329,13 | 336,87 | 342,57 | 320,18 | 330,20 |
| Santander | Betulia              | 18,88  | 0,00   | 19,03  | 76,48   | 153,52 | 134,93 | 329,90 | 272,69 | 78,28  | 98,52  |
| Santander | Bolívar              | 0,00   | 22,27  | 45,10  | 30,45   | 69,38  | 163,88 | 142,20 | 112,02 | 113,35 | 131,10 |
| Santander | Bucaramanga          | 60,01  | 44,30  | 50,31  | 52,10   | 139,78 | 230,01 | 229,87 | 234,71 | 211,97 | 215,99 |
| Santander | Cabrera              | 151,06 | 0,00   | 48,88  | 0,00    | 141,51 | 46,43  | 91,37  | 313,90 | 88,22  | 259,40 |
| Santander | California           | 0,00   | 53,94  | 106,84 | 52,99   | 52,69  | 104,17 | 257,20 | 255,62 | 655,24 | 398,80 |
| Santander | Capitanejo           | 0,00   | 66,96  | 33,77  | 17,06   | 51,67  | 573,81 | 491,06 | 460,26 | 464,87 | 523,18 |
| Santander | Carcasí              | 0,00   | 0,00   | 0,00   | 38,80   | 331,06 | 117,53 | 117,97 | 275,97 | 218,30 | 199,16 |
| Santander | Cepitá               | 0,00   | 0,00   | 0,00   | 51,55   | 259,07 | 208,88 | 52,69  | 159,49 | 268,10 | 108,34 |
| Santander | Cerrito              | 0,00   | 16,33  | 16,48  | 149,73  | 235,37 | 186,76 | 257,42 | 450,53 | 420,46 | 477,03 |
| Santander | Charalá              | 26,73  | 8,98   | 0,00   | 63,85   | 128,72 | 268,67 | 177,40 | 150,59 | 170,78 | 191,31 |
| Santander | Charta               | 98,78  | 0,00   | 0,00   | 137,69  | 35,22  | 285,51 | 180,96 | 294,33 | 262,17 | 303,38 |
| Santander | Chima                | 152,25 | 0,00   | 92,82  | 0,00    | 94,55  | 95,21  | 256,16 | 257,48 | 129,58 | 195,95 |
| Santander | Chipatá              | 0,00   | 77,88  | 38,98  | 117,07  | 117,23 | 117,39 | 137,15 | 215,86 | 176,89 | 334,65 |
| Santander | Cimitarra            | 33,11  | 94,02  | 54,93  | 155,42  | 146,41 | 190,94 | 178,98 | 190,44 | 167,66 | 187,36 |
| Santander | Concepción           | 17,27  | 0,00   | 0,00   | 285,61  | 361,21 | 292,18 | 942,18 | 355,47 | 321,24 | 114,72 |
| Santander | Confines             | 36,31  | 0,00   | 0,00   | 0,00    | 0,00   | 257,54 | 257,83 | 517,18 | 554,53 | 259,55 |
| Santander | Contratación         | 25,67  | 25,95  | 26,34  | 26,64   | 189,19 | 576,45 | 305,90 | 338,31 | 257,81 | 202,84 |
| Santander | Coromoro             | 0,00   | 0,00   | 40,24  | 80,30   | 80,10  | 13,33  | 79,78  | 66,28  | 105,85 | 171,41 |
| Santander | Curití               | 0,00   | 8,62   | 8,59   | 17,11   | 255,75 | 314,33 | 389,20 | 539,45 | 428,61 | 376,82 |
| Santander | El Carmen de Chucurí | 5,40   | 74,81  | 37,02  | 62,80   | 10,36  | 174,35 | 25,39  | 125,60 | 154,24 | 64,05  |
| Santander | El Guacamayo         | 0,00   | 0,00   | 45,81  | 92,89   | 235,74 | 143,61 | 48,50  | 245,82 | 199,50 | 559,23 |
| Santander | El Peñón             | 0,00   | 36,83  | 37,12  | 18,72   | 113,31 | 57,11  | 172,51 | 173,78 | 136,19 | 215,10 |
| Santander | El Playón            | 7,78   | 47,21  | 0,00   | 24,10   | 32,51  | 361,34 | 224,33 | 302,24 | 365,15 | 317,71 |
| Santander | Encino               | 0,00   | 0,00   | 0,00   | 0,00    | 77,73  | 0,00   | 0,00   | 119,19 | 0,00   | 80,65  |
| Santander | Enciso               | 156,29 | 26,48  | 81,06  | 1073,49 | 645,16 | 628,21 | 58,09  | 709,64 | 571,77 | 705,95 |
| Santander | Florián              | 47,15  | 204,53 | 173,28 | 236,56  | 236,85 | 63,24  | 110,81 | 15,85  | 174,58 | 63,56  |

|           |                    |        |        |        |        |        |        |        |        |        |        |
|-----------|--------------------|--------|--------|--------|--------|--------|--------|--------|--------|--------|--------|
| Santander | Floridablanca      | 19,03  | 42,11  | 53,85  | 102,64 | 148,80 | 180,58 | 198,18 | 213,83 | 194,80 | 228,15 |
| Santander | Galán              | 35,46  | 0,00   | 0,00   | 38,14  | 0,00   | 40,11  | 206,19 | 548,99 | 216,36 | 133,69 |
| Santander | Gambita            | 58,64  | 19,59  | 0,00   | 39,39  | 39,46  | 177,94 | 79,16  | 99,13  | 118,95 | 198,49 |
| Santander | Girón              | 15,96  | 29,66  | 46,51  | 124,79 | 113,28 | 166,75 | 149,91 | 158,95 | 142,48 | 172,68 |
| Santander | Guaca              | 0,00   | 0,00   | 0,00   | 15,04  | 197,00 | 168,04 | 154,06 | 248,18 | 78,19  | 141,84 |
| Santander | Guadalupe          | 55,26  | 0,00   | 19,05  | 116,14 | 216,19 | 420,25 | 244,00 | 330,65 | 357,44 | 384,45 |
| Santander | Guapotá            | 267,26 | 0,00   | 90,17  | 0,00   | 365,63 | 415,90 | 416,67 | 466,85 | 233,75 | 94,34  |
| Santander | Guavatá            | 23,64  | 0,00   | 0,00   | 199,40 | 304,26 | 181,07 | 210,14 | 187,32 | 163,09 | 635,36 |
| Santander | Güepsa             | 383,23 | 169,61 | 170,57 | 371,38 | 599,70 | 226,99 | 203,98 | 515,73 | 779,42 | 867,51 |
| Santander | Hato               | 41,75  | 0,00   | 0,00   | 126,16 | 126,42 | 253,70 | 634,79 | 297,87 | 469,08 | 341,88 |
| Santander | Jesús María        | 0,00   | 0,00   | 0,00   | 30,38  | 153,14 | 30,92  | 218,48 | 535,94 | 350,65 | 450,60 |
| Santander | Jordán             | 0,00   | 0,00   | 0,00   | 0,00   | 89,05  | 0,00   | 0,00   | 0,00   | 0,00   | 90,99  |
| Santander | La Belleza         | 47,06  | 93,95  | 70,34  | 105,35 | 128,58 | 198,48 | 174,95 | 151,50 | 81,52  | 81,47  |
| Santander | La Paz             | 90,81  | 0,00   | 55,37  | 55,80  | 150,15 | 56,74  | 152,56 | 96,12  | 174,69 | 176,33 |
| Santander | Landázuri          | 0,00   | 19,69  | 6,55   | 19,64  | 78,43  | 182,74 | 228,24 | 169,28 | 266,68 | 227,35 |
| Santander | Lebrija            | 169,90 | 99,67  | 94,55  | 225,50 | 288,49 | 232,44 | 330,39 | 365,67 | 355,29 | 398,50 |
| Santander | Los Santos         | 8,91   | 96,88  | 26,15  | 120,77 | 187,91 | 109,91 | 175,79 | 149,19 | 172,34 | 284,58 |
| Santander | Macaravita         | 0,00   | 0,00   | 0,00   | 0,00   | 159,17 | 242,03 | 328,27 | 124,84 | 84,10  | 214,04 |
| Santander | Málaga             | 0,00   | 10,75  | 53,82  | 323,42 | 280,75 | 297,52 | 325,12 | 325,63 | 582,09 | 621,19 |
| Santander | Matanza            | 0,00   | 70,51  | 88,97  | 287,46 | 163,37 | 458,55 | 424,90 | 524,15 | 377,57 | 305,46 |
| Santander | Mogotes            | 109,72 | 82,39  | 36,63  | 210,76 | 238,42 | 220,18 | 311,90 | 358,16 | 294,12 | 349,10 |
| Santander | Molagavita         | 17,76  | 17,96  | 0,00   | 0,00   | 129,61 | 149,76 | 132,28 | 229,62 | 231,08 | 175,44 |
| Santander | Ocamonte           | 60,68  | 20,32  | 0,00   | 0,00   | 185,22 | 186,10 | 395,01 | 417,54 | 293,19 | 505,48 |
| Santander | Oiba               | 27,04  | 53,68  | 0,00   | 0,00   | 183,98 | 530,99 | 388,84 | 506,09 | 494,12 | 423,19 |
| Santander | Onzaga             | 126,17 | 54,81  | 0,00   | 0,00   | 37,84  | 171,95 | 154,56 | 195,31 | 178,08 | 159,90 |
| Santander | Palmar             | 0,00   | 0,00   | 0,00   | 32,27  | 0,00   | 0,00   | 92,91  | 30,45  | 30,03  | 148,19 |
| Santander | Palmas del Socorro | 41,61  | 251,99 | 42,32  | 213,68 | 215,61 | 653,59 | 218,82 | 530,04 | 490,85 | 493,94 |

|           |                        |        |        |        |        |        |        |        |        |        |        |
|-----------|------------------------|--------|--------|--------|--------|--------|--------|--------|--------|--------|--------|
| Santander | Páramo                 | 0,00   | 0,00   | 0,00   | 0,00   | 126,90 | 528,30 | 198,61 | 319,88 | 607,98 | 481,00 |
| Santander | Piedecuesta            | 18,64  | 50,60  | 36,27  | 158,98 | 208,93 | 183,22 | 150,19 | 209,81 | 192,30 | 184,01 |
| Santander | Pinchote               | 219,44 | 21,57  | 148,40 | 62,62  | 164,17 | 181,60 | 556,33 | 117,32 | 57,68  | 340,59 |
| Santander | Puente Nacional        | 7,11   | 7,22   | 0,00   | 0,00   | 113,16 | 45,96  | 194,40 | 299,97 | 320,62 | 399,35 |
| Santander | Puerto Parra           | 29,84  | 0,00   | 14,48  | 28,54  | 70,34  | 111,03 | 136,67 | 26,94  | 39,75  | 78,38  |
| Santander | Puerto Wilches         | 6,35   | 85,72  | 120,63 | 161,92 | 133,37 | 76,18  | 82,52  | 199,91 | 95,20  | 139,64 |
| Santander | Rionegro               | 20,76  | 69,75  | 24,61  | 24,81  | 207,22 | 230,42 | 214,15 | 369,56 | 302,43 | 271,42 |
| Santander | Sabana de Torres       | 163,13 | 128,04 | 154,43 | 222,59 | 98,95  | 550,40 | 506,76 | 462,72 | 407,46 | 594,82 |
| Santander | San Andrés             | 42,12  | 95,98  | 0,00   | 219,01 | 233,23 | 135,07 | 307,73 | 381,06 | 222,48 | 154,17 |
| Santander | San Benito             | 0,00   | 0,00   | 76,18  | 126,65 | 75,91  | 25,28  | 25,24  | 125,79 | 175,61 | 25,03  |
| Santander | San Gil                | 161,63 | 9,06   | 27,05  | 67,32  | 319,55 | 396,11 | 348,01 | 291,49 | 336,67 | 372,77 |
| Santander | San Joaquín            | 175,99 | 71,71  | 72,78  | 333,58 | 226,33 | 76,31  | 429,35 | 632,91 | 361,74 | 449,90 |
| Santander | San José de Miranda    | 21,16  | 0,00   | 0,00   | 65,39  | 286,66 | 200,58 | 518,25 | 318,54 | 230,10 | 395,07 |
| Santander | San Miguel             | 0,00   | 0,00   | 0,00   | 0,00   | 120,19 | 325,07 | 410,17 | 249,69 | 378,31 | 383,14 |
| Santander | San Vicente de Chucurí | 98,38  | 17,82  | 5,91   | 8,83   | 46,90  | 236,50 | 223,98 | 228,91 | 219,40 | 184,12 |
| Santander | Santa Bárbara          | 0,00   | 0,00   | 89,73  | 225,53 | 318,33 | 457,46 | 462,32 | 279,59 | 467,95 | 329,88 |
| Santander | Santa Helena del Opón  | 0,00   | 45,22  | 90,81  | 22,80  | 0,00   | 22,99  | 23,09  | 23,15  | 23,23  | 0,00   |
| Santander | Simacota               | 34,56  | 93,51  | 35,57  | 312,20 | 194,72 | 160,36 | 287,64 | 253,52 | 320,97 | 299,17 |
| Santander | Socorro                | 74,97  | 77,93  | 77,51  | 164,21 | 70,00  | 335,08 | 316,88 | 479,68 | 346,67 | 413,45 |
| Santander | Suaita                 | 9,24   | 27,91  | 0,00   | 0,00   | 151,63 | 238,62 | 211,38 | 270,85 | 282,18 | 254,60 |
| Santander | Sucre                  | 22,09  | 11,15  | 78,86  | 0,00   | 57,37  | 69,46  | 81,79  | 94,45  | 142,91 | 132,15 |
| Santander | Suratá                 | 0,00   | 0,00   | 0,00   | 57,49  | 87,31  | 117,72 | 386,67 | 120,30 | 121,40 | 91,91  |
| Santander | Tona                   | 29,61  | 14,71  | 43,89  | 130,72 | 57,75  | 229,82 | 42,85  | 127,73 | 56,46  | 70,14  |
| Santander | Valle de San José      | 38,80  | 58,93  | 59,71  | 20,15  | 428,13 | 144,60 | 523,23 | 592,59 | 449,68 | 477,53 |
| Santander | Vélez                  | 61,26  | 107,57 | 30,83  | 30,94  | 362,24 | 249,29 | 99,04  | 224,92 | 173,16 | 410,68 |
| Santander | Vetas                  | 42,28  | 0,00   | 0,00   | 0,00   | 208,51 | 0,00   | 41,39  | 0,00   | 41,07  | 0,00   |
| Santander | Villanueva             | 148,26 | 0,00   | 76,69  | 15,60  | 317,81 | 500,57 | 559,03 | 368,32 | 682,83 | 660,52 |

|           |                     |        |        |        |        |        |        |        |        |        |        |
|-----------|---------------------|--------|--------|--------|--------|--------|--------|--------|--------|--------|--------|
| Santander | Zapatoca            | 0,00   | 10,83  | 0,00   | 21,87  | 131,74 | 220,73 | 255,02 | 200,69 | 246,39 | 213,70 |
| Sucre     | Buenavista          | 0,00   | 0,00   | 0,00   | 64,79  | 96,61  | 224,00 | 233,20 | 210,48 | 303,60 | 280,72 |
| Sucre     | Caimito             | 71,12  | 17,63  | 0,00   | 164,69 | 292,02 | 34,06  | 67,45  | 66,88  | 165,60 | 114,90 |
| Sucre     | Chalán              | 0,00   | 117,92 | 0,00   | 140,35 | 326,57 | 92,92  | 370,20 | 161,25 | 206,71 | 389,28 |
| Sucre     | Coloso              | 0,00   | 245,78 | 33,03  | 199,20 | 300,55 | 168,18 | 287,40 | 476,35 | 513,87 | 430,81 |
| Sucre     | Corozal             | 6,80   | 5,06   | 6,69   | 76,39  | 84,06  | 88,34  | 191,69 | 293,59 | 200,29 | 213,27 |
| Sucre     | Coveñas             | 85,19  | 451,54 | 41,09  | 266,41 | 460,24 | 514,34 | 520,67 | 466,17 | 524,76 | 362,87 |
| Sucre     | El Roble            | 0,00   | 41,09  | 10,15  | 50,18  | 178,59 | 147,06 | 242,44 | 201,30 | 132,70 | 93,72  |
| Sucre     | Galeras             | 0,00   | 0,00   | 0,00   | 75,10  | 337,84 | 145,51 | 240,34 | 171,15 | 302,16 | 219,35 |
| Sucre     | Guaranda            | 0,00   | 105,99 | 0,00   | 91,49  | 144,69 | 11,91  | 70,63  | 81,39  | 91,84  | 45,34  |
| Sucre     | La Unión            | 19,10  | 37,89  | 9,40   | 83,99  | 203,57 | 36,71  | 72,84  | 45,15  | 170,10 | 115,43 |
| Sucre     | Los Palmitos        | 0,00   | 0,00   | 0,00   | 15,56  | 0,00   | 10,37  | 83,03  | 140,07 | 72,70  | 176,67 |
| Sucre     | Majagual            | 9,40   | 21,82  | 15,51  | 58,66  | 128,99 | 24,44  | 151,96 | 120,93 | 84,19  | 77,76  |
| Sucre     | Morroa              | 60,88  | 112,82 | 22,30  | 227,74 | 355,74 | 430,85 | 397,53 | 378,60 | 325,73 | 363,44 |
| Sucre     | Ovejas              | 74,30  | 27,93  | 107,39 | 56,17  | 159,60 | 94,08  | 174,56 | 151,36 | 260,77 | 213,98 |
| Sucre     | Palmito             | 0,00   | 58,29  | 40,88  | 144,49 | 102,41 | 23,21  | 83,49  | 156,40 | 358,13 | 222,17 |
| Sucre     | Sampués             | 0,00   | 0,00   | 0,00   | 61,83  | 259,71 | 18,67  | 369,25 | 434,01 | 403,43 | 507,00 |
| Sucre     | San Benito Abad     | 4,27   | 8,45   | 4,18   | 33,15  | 90,21  | 85,21  | 104,42 | 39,73  | 39,31  | 42,76  |
| Sucre     | San Juan de Betulia | 0,00   | 32,17  | 0,00   | 72,19  | 88,11  | 16,00  | 343,59 | 215,50 | 247,13 | 270,77 |
| Sucre     | San Luis de Sincé   | 6,43   | 19,09  | 12,60  | 12,47  | 49,40  | 73,37  | 87,78  | 128,89 | 100,93 | 173,45 |
| Sucre     | San Marcos          | 129,17 | 209,63 | 43,32  | 80,04  | 237,29 | 92,67  | 211,86 | 193,32 | 187,49 | 257,90 |
| Sucre     | San Onofre          | 0,00   | 86,49  | 23,02  | 58,13  | 123,54 | 157,27 | 137,73 | 176,76 | 175,25 | 175,73 |
| Sucre     | San Pedro           | 0,00   | 12,25  | 0,00   | 264,62 | 302,28 | 278,34 | 421,78 | 304,82 | 586,11 | 281,16 |
| Sucre     | Santiago de Tolú    | 41,30  | 33,83  | 9,98   | 291,04 | 382,53 | 426,66 | 186,41 | 287,19 | 321,36 | 248,00 |
| Sucre     | Sincelejo           | 95,88  | 8,84   | 15,05  | 127,22 | 242,68 | 238,46 | 304,59 | 319,12 | 260,17 | 240,12 |
| Sucre     | Sucre               | 4,46   | 22,33  | 22,34  | 13,41  | 35,77  | 26,83  | 76,01  | 75,98  | 35,74  | 93,74  |
| Sucre     | Tolú Viejo          | 100,33 | 21,13  | 79,26  | 253,73 | 259,09 | 550,03 | 354,44 | 391,53 | 291,05 | 211,70 |

|        |                   |        |        |        |        |        |        |        |        |        |        |
|--------|-------------------|--------|--------|--------|--------|--------|--------|--------|--------|--------|--------|
| Tolima | Alpujarra         | 116,64 | 0,00   | 176,13 | 117,83 | 157,67 | 178,04 | 119,19 | 259,27 | 180,29 | 261,36 |
| Tolima | Alvarado          | 156,28 | 55,89  | 67,20  | 44,89  | 292,60 | 349,34 | 428,94 | 361,70 | 384,88 | 465,06 |
| Tolima | Ambalema          | 53,26  | 215,63 | 27,26  | 358,67 | 850,89 | 635,23 | 485,71 | 651,42 | 248,65 | 444,12 |
| Tolima | Anzoátegui        | 53,44  | 123,28 | 5,80   | 11,48  | 107,84 | 151,56 | 177,63 | 137,20 | 135,62 | 85,85  |
| Tolima | Armero            | 155,81 | 7,86   | 15,85  | 231,83 | 749,94 | 626,58 | 829,30 | 670,86 | 426,42 | 726,41 |
| Tolima | Ataco             | 4,54   | 63,41  | 0,00   | 4,51   | 62,94  | 125,53 | 138,57 | 102,49 | 102,16 | 79,68  |
| Tolima | Cajamarca         | 30,36  | 30,38  | 10,13  | 152,08 | 319,60 | 309,66 | 396,24 | 264,35 | 330,69 | 285,12 |
| Tolima | Carmen de Apicalá | 211,89 | 468,71 | 256,50 | 395,12 | 612,93 | 633,64 | 573,72 | 947,49 | 693,73 | 837,58 |
| Tolima | Casabianca        | 58,13  | 58,33  | 14,62  | 14,68  | 132,68 | 88,65  | 207,78 | 119,14 | 314,18 | 330,28 |
| Tolima | Chaparral         | 96,12  | 153,64 | 61,84  | 157,68 | 251,17 | 214,77 | 261,25 | 324,64 | 256,38 | 190,48 |
| Tolima | Coello            | 10,92  | 65,05  | 32,28  | 181,43 | 296,61 | 273,11 | 260,63 | 248,24 | 297,74 | 224,26 |
| Tolima | Coyaima           | 17,84  | 17,83  | 3,56   | 67,57  | 206,04 | 113,57 | 113,39 | 187,59 | 127,19 | 144,70 |
| Tolima | Cunday            | 76,53  | 67,60  | 68,17  | 49,16  | 69,46  | 150,20 | 161,65 | 50,94  | 0,00   | 207,60 |
| Tolima | Dolores           | 89,66  | 0,00   | 0,00   | 151,16 | 105,89 | 178,74 | 289,12 | 414,38 | 333,00 | 274,49 |
| Tolima | Espinal           | 49,78  | 51,06  | 115,19 | 168,84 | 459,44 | 534,19 | 487,29 | 564,94 | 543,11 | 506,90 |
| Tolima | Falan             | 0,00   | 75,58  | 10,80  | 64,86  | 54,08  | 54,12  | 249,13 | 336,04 | 227,82 | 260,56 |
| Tolima | Flandes           | 3,54   | 28,21  | 42,15  | 178,37 | 386,77 | 350,68 | 422,10 | 465,39 | 453,51 | 397,27 |
| Tolima | Fresno            | 93,18  | 41,89  | 35,57  | 90,85  | 283,21 | 277,62 | 347,54 | 417,83 | 432,57 | 384,55 |
| Tolima | Guamo             | 154,32 | 70,36  | 20,67  | 133,82 | 362,51 | 461,83 | 425,83 | 499,57 | 432,46 | 395,48 |
| Tolima | Herveo            | 0,00   | 0,00   | 22,89  | 69,52  | 93,83  | 189,96 | 192,49 | 255,79 | 259,26 | 187,31 |
| Tolima | Honda             | 100,94 | 283,04 | 38,10  | 196,08 | 283,45 | 266,47 | 253,33 | 299,62 | 290,55 | 293,31 |
| Tolima | Ibagué            | 59,63  | 27,16  | 107,87 | 117,75 | 195,29 | 197,59 | 216,99 | 259,03 | 224,02 | 247,49 |
| Tolima | Icononzo          | 112,58 | 8,70   | 0,00   | 105,59 | 212,45 | 302,92 | 322,93 | 234,93 | 173,01 | 275,38 |
| Tolima | Lérida            | 62,78  | 258,97 | 74,78  | 129,46 | 441,51 | 418,59 | 578,87 | 523,00 | 386,72 | 557,63 |
| Tolima | Líbano            | 26,25  | 122,23 | 21,67  | 58,02  | 247,63 | 234,08 | 252,31 | 236,24 | 308,98 | 295,53 |
| Tolima | Mariquita         | 39,37  | 202,64 | 108,70 | 205,10 | 436,97 | 370,10 | 487,09 | 627,93 | 507,37 | 519,07 |
| Tolima | Melgar            | 53,71  | 342,55 | 172,61 | 272,38 | 493,76 | 609,08 | 646,18 | 777,64 | 485,48 | 773,27 |

|                 |                   |        |        |        |        |        |        |        |        |        |        |
|-----------------|-------------------|--------|--------|--------|--------|--------|--------|--------|--------|--------|--------|
| Tolima          | Murillo           | 196,54 | 98,50  | 19,71  | 0,00   | 79,13  | 79,13  | 99,25  | 19,87  | 19,88  | 79,71  |
| Tolima          | Natagaima         | 112,70 | 152,13 | 0,00   | 113,59 | 438,10 | 267,98 | 224,69 | 278,31 | 172,77 | 182,09 |
| Tolima          | Ortega            | 53,78  | 15,01  | 48,22  | 208,79 | 103,26 | 204,21 | 229,36 | 174,79 | 178,33 | 160,34 |
| Tolima          | Palocabildo       | 52,53  | 21,08  | 10,59  | 212,81 | 213,65 | 118,13 | 215,59 | 443,72 | 195,72 | 272,93 |
| Tolima          | Piedras           | 54,92  | 18,24  | 0,00   | 54,29  | 36,05  | 233,52 | 250,72 | 339,16 | 302,54 | 212,77 |
| Tolima          | Planadas          | 203,00 | 303,95 | 74,17  | 266,00 | 198,39 | 104,05 | 238,00 | 287,75 | 183,73 | 156,80 |
| Tolima          | Prado             | 35,03  | 212,56 | 23,93  | 48,39  | 134,61 | 322,22 | 489,46 | 558,45 | 513,41 | 597,33 |
| Tolima          | Purificación      | 14,20  | 95,35  | 52,69  | 276,21 | 427,87 | 477,76 | 406,73 | 449,34 | 317,58 | 166,60 |
| Tolima          | Rioblanco         | 133,67 | 130,32 | 55,56  | 15,94  | 80,05  | 72,38  | 88,87  | 77,05  | 97,75  | 155,36 |
| Tolima          | Roncesvalles      | 0,00   | 31,82  | 0,00   | 0,00   | 15,87  | 31,73  | 94,98  | 189,90 | 173,75 | 126,10 |
| Tolima          | Rovira            | 9,33   | 9,37   | 23,54  | 156,09 | 237,64 | 363,05 | 455,77 | 409,66 | 295,53 | 413,79 |
| Tolima          | Saldaña           | 174,31 | 174,97 | 40,49  | 284,34 | 489,43 | 600,68 | 514,19 | 371,72 | 346,09 | 493,57 |
| Tolima          | San Antonio       | 6,60   | 79,73  | 80,29  | 175,10 | 304,92 | 225,07 | 329,33 | 220,95 | 284,72 | 286,51 |
| Tolima          | San Luis          | 41,57  | 15,60  | 78,02  | 156,11 | 98,92  | 218,80 | 260,61 | 318,12 | 323,52 | 287,16 |
| Tolima          | Santa Isabel      | 30,64  | 15,36  | 0,00   | 30,88  | 61,94  | 62,14  | 15,57  | 78,09  | 0,00   | 31,46  |
| Tolima          | Suárez            | 44,07  | 0,00   | 0,00   | 44,11  | 220,07 | 132,19 | 198,02 | 132,01 | 329,31 | 175,94 |
| Tolima          | Valle de San Juan | 80,61  | 0,00   | 16,03  | 111,91 | 159,41 | 222,54 | 63,32  | 378,85 | 409,13 | 361,18 |
| Tolima          | Venadillo         | 5,29   | 0,00   | 15,71  | 250,10 | 326,73 | 118,81 | 149,20 | 143,47 | 194,02 | 183,19 |
| Tolima          | Villahermosa      | 108,03 | 81,41  | 9,08   | 100,29 | 100,71 | 147,17 | 249,58 | 130,22 | 215,03 | 281,64 |
| Tolima          | Villarrica        | 33,02  | 0,00   | 16,95  | 0,00   | 34,79  | 176,43 | 357,21 | 217,39 | 146,82 | 222,68 |
| Valle del Cauca | Alcalá            | 21,94  | 430,43 | 316,57 | 320,63 | 365,24 | 412,73 | 438,77 | 444,34 | 430,63 | 403,69 |
| Valle del Cauca | Andalucía         | 22,17  | 472,22 | 166,92 | 239,61 | 262,23 | 368,94 | 436,61 | 291,51 | 258,21 | 500,37 |
| Valle del Cauca | Ansermanuevo      | 9,78   | 216,51 | 197,90 | 258,69 | 280,15 | 417,59 | 389,46 | 340,69 | 342,48 | 293,04 |
| Valle del Cauca | Argelia           | 120,59 | 242,06 | 197,42 | 365,69 | 504,82 | 337,53 | 261,82 | 402,35 | 372,56 | 342,73 |
| Valle del Cauca | Bolívar           | 140,40 | 182,96 | 20,59  | 41,73  | 148,00 | 299,98 | 245,90 | 410,20 | 474,78 | 533,71 |
| Valle del Cauca | Buenaventura      | 3,51   | 26,07  | 20,80  | 27,29  | 17,57  | 27,05  | 22,37  | 20,66  | 13,51  | 23,79  |
| Valle del Cauca | Bugalagrande      | 0,00   | 9,31   | 4,66   | 247,64 | 463,48 | 553,68 | 432,66 | 400,57 | 543,20 | 444,99 |



|                 |                     |        |        |        |        |        |        |        |        |        |        |
|-----------------|---------------------|--------|--------|--------|--------|--------|--------|--------|--------|--------|--------|
| Valle del Cauca | Caicedonia          | 3,26   | 13,10  | 473,05 | 458,13 | 568,82 | 547,59 | 599,36 | 551,32 | 492,79 | 602,04 |
| Valle del Cauca | Cali                | 3,78   | 152,00 | 90,64  | 118,95 | 151,92 | 171,83 | 162,91 | 204,03 | 175,41 | 187,81 |
| Valle del Cauca | Calima              | 77,19  | 423,92 | 218,05 | 262,50 | 357,74 | 484,63 | 477,34 | 641,96 | 558,27 | 500,25 |
| Valle del Cauca | Candelaria          | 55,20  | 174,02 | 65,62  | 80,48  | 51,98  | 204,84 | 97,10  | 285,77 | 208,08 | 37,39  |
| Valle del Cauca | Cartago             | 2,38   | 205,59 | 256,74 | 256,72 | 281,47 | 318,28 | 240,79 | 286,59 | 235,16 | 239,17 |
| Valle del Cauca | Dagua               | 126,74 | 151,63 | 274,41 | 237,32 | 567,75 | 540,98 | 625,02 | 675,27 | 552,11 | 561,27 |
| Valle del Cauca | El Águila           | 37,19  | 166,84 | 184,74 | 220,87 | 265,98 | 219,28 | 163,83 | 172,32 | 108,31 | 215,91 |
| Valle del Cauca | El Cairo            | 63,34  | 0,00   | 0,00   | 155,31 | 401,40 | 398,90 | 274,20 | 282,43 | 230,37 | 218,97 |
| Valle del Cauca | El Cerrito          | 1,81   | 9,01   | 12,56  | 139,21 | 102,98 | 166,05 | 268,93 | 248,35 | 142,70 | 181,83 |
| Valle del Cauca | El Dovio            | 42,90  | 314,67 | 175,84 | 155,57 | 224,82 | 204,73 | 379,27 | 418,75 | 423,13 | 344,99 |
| Valle del Cauca | Florida             | 1,77   | 100,61 | 360,57 | 250,60 | 282,86 | 229,63 | 251,30 | 404,07 | 294,17 | 377,08 |
| Valle del Cauca | Ginebra             | 40,85  | 35,44  | 120,45 | 24,87  | 113,36 | 102,54 | 416,16 | 608,91 | 555,90 | 640,33 |
| Valle del Cauca | Guacarí             | 3,10   | 15,36  | 158,33 | 202,33 | 224,59 | 302,97 | 347,52 | 347,61 | 269,37 | 396,56 |
| Valle del Cauca | Guadalajara de Buga | 9,44   | 191,62 | 277,01 | 204,13 | 248,39 | 225,44 | 188,57 | 202,72 | 249,06 | 352,09 |
| Valle del Cauca | Jamundí             | 2,96   | 306,68 | 56,85  | 285,80 | 328,98 | 380,97 | 314,71 | 381,67 | 317,82 | 387,48 |
| Valle del Cauca | La Cumbre           | 277,08 | 490,07 | 302,14 | 433,71 | 238,20 | 518,50 | 691,89 | 924,63 | 807,71 | 821,52 |
| Valle del Cauca | La Unión            | 115,48 | 253,91 | 237,91 | 138,60 | 119,22 | 195,33 | 235,93 | 428,85 | 262,52 | 224,19 |
| Valle del Cauca | La Victoria         | 21,51  | 187,54 | 29,04  | 270,19 | 242,59 | 273,71 | 402,20 | 434,75 | 150,91 | 448,09 |
| Valle del Cauca | Obando              | 55,26  | 406,11 | 411,44 | 266,36 | 312,88 | 406,28 | 363,95 | 442,63 | 560,82 | 358,52 |
| Valle del Cauca | Palmira             | 24,62  | 229,30 | 125,47 | 148,01 | 203,97 | 262,16 | 285,00 | 277,15 | 248,08 | 225,62 |
| Valle del Cauca | Pradera             | 4,00   | 400,98 | 314,20 | 364,39 | 453,32 | 445,97 | 368,00 | 440,61 | 346,35 | 342,04 |
| Valle del Cauca | Restrepo            | 100,68 | 100,45 | 262,81 | 343,28 | 442,01 | 465,75 | 427,38 | 432,50 | 505,17 | 675,84 |
| Valle del Cauca | Riofrío             | 83,62  | 315,84 | 240,70 | 269,69 | 325,09 | 362,72 | 335,68 | 488,07 | 312,39 | 400,11 |
| Valle del Cauca | Roldanillo          | 125,36 | 278,57 | 306,69 | 296,58 | 363,86 | 638,81 | 555,00 | 503,59 | 460,63 | 585,87 |
| Valle del Cauca | San Pedro           | 0,00   | 103,29 | 275,61 | 230,47 | 349,61 | 448,35 | 272,05 | 335,53 | 352,95 | 369,97 |
| Valle del Cauca | Sevilla             | 27,48  | 25,51  | 0,00   | 98,92  | 131,93 | 398,13 | 474,88 | 468,90 | 443,04 | 363,23 |
| Valle del Cauca | Toro                | 118,83 | 324,39 | 304,93 | 273,00 | 173,17 | 80,16  | 104,44 | 85,72  | 91,51  | 303,80 |

|                 |                |        |        |        |        |         |         |        |         |         |         |
|-----------------|----------------|--------|--------|--------|--------|---------|---------|--------|---------|---------|---------|
| Valle del Cauca | Trujillo       | 113,15 | 86,45  | 173,39 | 168,46 | 119,93  | 185,90  | 274,38 | 346,95  | 436,39  | 332,65  |
| Valle del Cauca | Tuluá          | 23,95  | 93,59  | 38,61  | 38,14  | 113,54  | 166,06  | 189,25 | 218,09  | 218,35  | 170,02  |
| Valle del Cauca | Ulloa          | 17,54  | 35,27  | 531,35 | 374,06 | 661,90  | 504,23  | 670,29 | 564,66  | 384,97  | 701,62  |
| Valle del Cauca | Versalles      | 0,00   | 37,78  | 293,63 | 413,97 | 131,25  | 266,17  | 418,30 | 519,27  | 332,64  | 393,31  |
| Valle del Cauca | Vijes          | 40,00  | 148,27 | 39,07  | 202,66 | 76,24   | 160,06  | 213,99 | 468,49  | 490,11  | 421,83  |
| Valle del Cauca | Yotoco         | 0,00   | 6,35   | 315,88 | 238,98 | 256,62  | 299,01  | 303,99 | 345,79  | 276,63  | 434,57  |
| Valle del Cauca | Yumbo          | 4,13   | 405,26 | 301,19 | 318,11 | 374,44  | 384,86  | 369,57 | 417,73  | 282,53  | 301,00  |
| Valle del Cauca | Zarzal         | 4,79   | 234,67 | 180,69 | 204,46 | 195,53  | 321,13  | 342,79 | 386,27  | 353,72  | 418,10  |
| Vaupés          | Carurú         | 0,00   | 0,00   | 0,00   | 0,00   | 0,00    | 30,21   | 30,15  | 120,41  | 30,06   | 0,00    |
| Vaupés          | Mitú           | 48,18  | 0,00   | 0,00   | 66,59  | 115,33  | 127,21  | 251,92 | 332,64  | 294,60  | 260,51  |
| Vaupés          | Pacoa          | 298,06 | 269,82 | 465,59 | 533,18 | 289,07  | 395,03  | 183,65 | 986,37  | 245,23  | 0,00    |
| Vaupés          | Papunahua      | 0,00   | 0,00   | 0,00   | 0,00   | 116,14  | 700,12  | 117,23 | 0,00    | 0,00    | 0,00    |
| Vaupés          | Taraira        | 0,00   | 0,00   | 0,00   | 98,52  | 3972,19 | 1100,00 | 806,45 | 1524,39 | 5840,16 | 1033,06 |
| Vaupés          | Yavarate       | 0,00   | 0,00   | 396,51 | 79,49  | 1752,99 | 2158,27 | 80,13  | 80,39   | 0,00    | 80,97   |
| Vichada         | Cumaribo       | 0,00   | 3,22   | 0,00   | 15,31  | 11,95   | 32,06   | 25,61  | 44,45   | 16,27   | 39,75   |
| Vichada         | La Primavera   | 8,72   | 209,98 | 258,92 | 155,95 | 37,59   | 43,51   | 132,92 | 101,28  | 91,25   | 144,78  |
| Vichada         | Puerto Carreño | 0,00   | 121,17 | 231,16 | 337,42 | 115,12  | 266,45  | 412,90 | 883,59  | 628,45  | 643,75  |
| Vichada         | Santa Rosalía  | 116,96 | 114,22 | 251,33 | 218,64 | 26,78   | 131,34  | 128,97 | 278,76  | 224,33  | 122,67  |
