# Supplementary material for: Epidemiological scenarios for human rabies exposure notified in Colombia during ten years: A challenge to implement surveillance actions with a differential approach on vulnerable populations
Source: PubMed Central journal article supplement (PMC6934280; doi:10.1371/journal.pone.0213120), 2019-12-27
Supplement: pone.0213120.s002.pdf [file pone.0213120.s002.pdf]

**TABLE. Mean incidence of HRE by animal aggressor type in all cities of Colombia (2006-2017)**

| DEPARTMENT | CITY                 | DOG    | CAT   | BAT  | FARM ANIMALS |
|------------|----------------------|--------|-------|------|--------------|
| Amazonas   | Miriti - Paraná      | 18,90  | 0,00  | 6,53 | 0,00         |
| Amazonas   | Leticia              | 258,11 | 21,33 | 1,99 | 1,73         |
| Amazonas   | El Encanto           | 12,83  | 0,00  | 0,00 | 0,00         |
| Amazonas   | La Chorrera          | 10,58  | 0,00  | 0,00 | 0,00         |
| Amazonas   | La Pedrera           | 19,67  | 0,00  | 0,00 | 0,00         |
| Amazonas   | La Victoria          | 113,50 | 0,00  | 0,00 | 0,00         |
| Amazonas   | Puerto Alegría       | 23,33  | 0,00  | 0,00 | 0,00         |
| Amazonas   | Puerto Arica         | 7,20   | 0,00  | 0,00 | 0,00         |
| Amazonas   | Puerto Nariño        | 77,26  | 0,00  | 0,00 | 1,26         |
| Amazonas   | Puerto Santander     | 15,19  | 3,78  | 0,00 | 0,00         |
| Amazonas   | Tarapacá             | 43,94  | 2,53  | 0,00 | 0,00         |
| Antioquia  | Guatapé              | 444,65 | 27,77 | 5,64 | 0,00         |
| Antioquia  | Carolina             | 73,68  | 5,43  | 2,76 | 0,00         |
| Antioquia  | Nariño               | 309,91 | 9,44  | 2,38 | 1,21         |
| Antioquia  | Cisneros             | 170,79 | 31,53 | 2,20 | 1,10         |
| Antioquia  | Liborina             | 39,89  | 2,10  | 2,10 | 0,00         |
| Antioquia  | Hispania             | 168,70 | 20,56 | 2,05 | 0,00         |
| Antioquia  | Peñol                | 188,71 | 11,27 | 1,88 | 0,00         |
| Antioquia  | Toledo               | 68,20  | 9,58  | 1,69 | 0,00         |
| Antioquia  | Heliconia            | 127,64 | 8,33  | 1,63 | 0,00         |
| Antioquia  | La Pintada           | 261,59 | 29,83 | 1,52 | 0,00         |
| Antioquia  | Venecia              | 234,93 | 23,26 | 1,50 | 0,75         |
| Antioquia  | Girardota            | 234,84 | 20,43 | 1,39 | 0,81         |
| Antioquia  | Puerto Berrío        | 133,16 | 16,44 | 1,30 | 0,70         |
| Antioquia  | Dabeiba              | 58,86  | 4,23  | 1,28 | 0,85         |
| Antioquia  | Santafé de Antioquia | 243,67 | 25,96 | 1,26 | 0,85         |
| Antioquia  | Yalí                 | 111,92 | 8,58  | 1,25 | 1,22         |
| Antioquia  | Sabanalarga          | 73,25  | 8,55  | 1,22 | 2,44         |
| Antioquia  | Uramita              | 43,60  | 7,26  | 1,21 | 0,00         |
| Antioquia  | San Roque            | 215,16 | 15,32 | 1,13 | 0,00         |
| Antioquia  | Campamento           | 50,09  | 3,30  | 1,09 | 0,00         |
| Antioquia  | Puerto Nare          | 58,62  | 10,22 | 1,07 | 0,00         |
| Antioquia  | Entrerrios           | 108,31 | 12,73 | 1,04 | 0,00         |
| Antioquia  | Mutatá               | 78,23  | 10,07 | 0,98 | 4,09         |
| Antioquia  | San Luis             | 152,22 | 10,03 | 0,91 | 0,00         |

|           |                    |        |       |      |      |
|-----------|--------------------|--------|-------|------|------|
| Antioquia | El Bagre           | 65,63  | 7,01  | 0,83 | 0,63 |
| Antioquia | Barbosa            | 277,66 | 13,85 | 0,81 | 0,83 |
| Antioquia | Tarazá             | 27,06  | 3,34  | 0,79 | 0,81 |
| Antioquia | San Rafael         | 270,28 | 32,00 | 0,75 | 0,76 |
| Antioquia | Remedios           | 110,81 | 8,48  | 0,73 | 3,05 |
| Antioquia | Ciudad Bolívar     | 98,15  | 10,19 | 0,72 | 1,43 |
| Antioquia | Chigorodó          | 98,23  | 12,19 | 0,70 | 1,27 |
| Antioquia | Támesis            | 294,02 | 22,33 | 0,65 | 1,28 |
| Antioquia | San Pedro de Uraba | 68,07  | 7,20  | 0,65 | 5,82 |
| Antioquia | Yondó              | 90,49  | 16,45 | 0,62 | 6,22 |
| Antioquia | Caldas             | 153,88 | 11,83 | 0,54 | 0,00 |
| Antioquia | La Unión           | 167,37 | 7,96  | 0,54 | 0,52 |
| Antioquia | Segovia            | 61,07  | 6,23  | 0,53 | 0,26 |
| Antioquia | Puerto Triunfo     | 87,43  | 14,15 | 0,52 | 0,55 |
| Antioquia | Arboletes          | 109,62 | 5,77  | 0,51 | 3,94 |
| Antioquia | Fredonia           | 166,98 | 12,27 | 0,46 | 0,45 |
| Antioquia | Nechí              | 36,65  | 3,83  | 0,43 | 0,40 |
| Antioquia | San Juan de Urabá  | 47,57  | 5,49  | 0,40 | 2,49 |
| Antioquia | San Pedro          | 233,38 | 2,66  | 0,40 | 0,74 |
| Antioquia | La Ceja            | 181,83 | 11,42 | 0,38 | 0,98 |
| Antioquia | El Santuario       | 116,58 | 4,07  | 0,37 | 1,11 |
| Antioquia | Envigado           | 77,26  | 9,57  | 0,37 | 0,22 |
| Antioquia | Apartadó           | 59,83  | 5,82  | 0,35 | 0,31 |
| Antioquia | Zaragoza           | 91,26  | 7,83  | 0,33 | 2,33 |
| Antioquia | Caucasia           | 42,48  | 4,16  | 0,28 | 1,03 |
| Antioquia | Urrao              | 95,70  | 6,83  | 0,25 | 0,24 |
| Antioquia | Bello              | 87,64  | 9,26  | 0,23 | 0,16 |
| Antioquia | Marinilla          | 123,01 | 3,48  | 0,21 | 0,00 |
| Antioquia | Sabaneta           | 118,43 | 13,93 | 0,20 | 0,21 |
| Antioquia | Medellín           | 86,87  | 8,73  | 0,20 | 0,11 |
| Antioquia | Carepa             | 70,00  | 6,03  | 0,17 | 2,55 |
| Antioquia | Necoclí            | 89,71  | 4,45  | 0,16 | 2,65 |
| Antioquia | La Estrella        | 121,13 | 10,48 | 0,16 | 0,51 |
| Antioquia | Copacabana         | 133,21 | 11,03 | 0,15 | 0,14 |
| Antioquia | Itagui             | 91,62  | 12,31 | 0,12 | 0,08 |
| Antioquia | Rionegro           | 135,61 | 10,51 | 0,08 | 0,34 |
| Antioquia | Abejorral          | 97,78  | 11,29 | 0,00 | 2,00 |
| Antioquia | Abriaquí           | 111,60 | 9,40  | 0,00 | 0,00 |
| Antioquia | Alejandro          | 73,89  | 17,17 | 0,00 | 0,00 |
| Antioquia | Amagá              | 171,41 | 15,43 | 0,00 | 0,00 |
| Antioquia | Amalfi             | 81,47  | 6,91  | 0,00 | 0,00 |

|           |                        |        |       |      |      |
|-----------|------------------------|--------|-------|------|------|
| Antioquia | Andes                  | 130,14 | 9,56  | 0,00 | 0,23 |
| Antioquia | Angelópolis            | 63,47  | 2,41  | 0,00 | 1,17 |
| Antioquia | Angostura              | 89,18  | 3,48  | 0,00 | 0,00 |
| Antioquia | Anorí                  | 80,80  | 6,68  | 0,00 | 0,63 |
| Antioquia | Anza                   | 49,09  | 3,97  | 0,00 | 0,00 |
| Antioquia | Argelia                | 279,42 | 3,31  | 0,00 | 0,00 |
| Antioquia | Armenia                | 177,76 | 29,17 | 0,00 | 0,00 |
| Antioquia | Belmira                | 56,25  | 6,11  | 0,00 | 3,02 |
| Antioquia | Betania                | 127,35 | 6,20  | 0,00 | 0,00 |
| Antioquia | Betulia                | 89,19  | 8,08  | 0,00 | 0,00 |
| Antioquia | Briceño                | 64,71  | 4,60  | 0,00 | 0,00 |
| Antioquia | Buriticá               | 91,70  | 2,98  | 0,00 | 0,00 |
| Antioquia | Cáceres                | 27,29  | 2,27  | 0,00 | 1,19 |
| Antioquia | Caicedo                | 75,37  | 3,70  | 0,00 | 0,00 |
| Antioquia | Cañasgordas            | 106,02 | 5,95  | 0,00 | 0,59 |
| Antioquia | Caracolí               | 194,55 | 36,44 | 0,00 | 4,27 |
| Antioquia | Caramanta              | 135,27 | 11,16 | 0,00 | 0,00 |
| Antioquia | Cocorná                | 30,00  | 0,67  | 0,00 | 0,00 |
| Antioquia | Concepción             | 167,30 | 21,83 | 0,00 | 2,53 |
| Antioquia | Concordia              | 118,43 | 9,13  | 0,00 | 0,00 |
| Antioquia | Don Matías             | 82,95  | 7,98  | 0,00 | 0,00 |
| Antioquia | Ebéjico                | 129,42 | 11,19 | 0,00 | 0,00 |
| Antioquia | El Carmen de Viboral   | 181,79 | 11,98 | 0,00 | 0,67 |
| Antioquia | Frontino               | 113,52 | 7,49  | 0,00 | 0,00 |
| Antioquia | Giraldo                | 61,63  | 7,37  | 0,00 | 2,44 |
| Antioquia | Gómez Plata            | 61,05  | 1,55  | 0,00 | 0,00 |
| Antioquia | Granada                | 249,25 | 2,03  | 0,00 | 0,00 |
| Antioquia | Guadalupe              | 183,19 | 14,34 | 0,00 | 0,00 |
| Antioquia | Guarne                 | 148,13 | 10,51 | 0,00 | 0,45 |
| Antioquia | Ituango                | 76,56  | 2,76  | 0,00 | 0,00 |
| Antioquia | Jardín                 | 187,35 | 11,51 | 0,00 | 0,00 |
| Antioquia | Jericó                 | 99,13  | 25,28 | 0,00 | 0,00 |
| Antioquia | Maceo                  | 177,10 | 13,72 | 0,00 | 1,35 |
| Antioquia | Montebello             | 48,91  | 1,49  | 0,00 | 0,00 |
| Antioquia | Murindó                | 13,40  | 0,00  | 0,00 | 0,00 |
| Antioquia | Olaya                  | 93,97  | 21,79 | 0,00 | 0,00 |
| Antioquia | Peque                  | 66,36  | 4,69  | 0,00 | 0,92 |
| Antioquia | Pueblorrico            | 231,92 | 13,60 | 0,00 | 1,38 |
| Antioquia | Retiro                 | 187,45 | 16,38 | 0,00 | 1,04 |
| Antioquia | Salgar                 | 130,57 | 4,51  | 0,00 | 0,57 |
| Antioquia | San Andrés de Cuerquía | 116,86 | 9,45  | 0,00 | 0,00 |

|                            |                        |        |       |      |       |
|----------------------------|------------------------|--------|-------|------|-------|
| Antioquia                  | San Carlos             | 68,20  | 10,60 | 0,00 | 0,00  |
| Antioquia                  | San Francisco          | 377,72 | 10,88 | 0,00 | 0,00  |
| Antioquia                  | San Jerónimo           | 316,00 | 43,78 | 0,00 | 0,00  |
| Antioquia                  | San José de La Montaña | 168,59 | 15,09 | 0,00 | 3,00  |
| Antioquia                  | San Vicente            | 48,54  | 3,51  | 0,00 | 0,00  |
| Antioquia                  | Santa Bárbara          | 174,40 | 20,85 | 0,00 | 0,44  |
| Antioquia                  | Santa Rosa de Osos     | 83,42  | 7,41  | 0,00 | 0,86  |
| Antioquia                  | Santo Domingo          | 116,76 | 12,24 | 0,00 | 0,00  |
| Antioquia                  | Sonson                 | 150,90 | 10,73 | 0,00 | 0,28  |
| Antioquia                  | Sopetrán               | 177,86 | 22,78 | 0,00 | 0,00  |
| Antioquia                  | Tarso                  | 198,04 | 27,52 | 0,00 | 0,00  |
| Antioquia                  | Titiribí               | 102,97 | 16,90 | 0,00 | 0,70  |
| Antioquia                  | Turbo                  | 50,79  | 3,12  | 0,00 | 1,75  |
| Antioquia                  | Valdivia               | 77,22  | 5,98  | 0,00 | 0,00  |
| Antioquia                  | Valparaíso             | 269,82 | 30,51 | 0,00 | 1,60  |
| Antioquia                  | Vegachí                | 105,33 | 13,33 | 0,00 | 0,00  |
| Antioquia                  | Vigía del Fuerte       | 3,58   | 0,00  | 0,00 | 0,00  |
| Antioquia                  | Yarumal                | 105,49 | 7,08  | 0,00 | 0,21  |
| Antioquia                  | Yolombó                | 101,68 | 8,27  | 0,00 | 0,00  |
| Arauca                     | Tame                   | 155,39 | 14,00 | 3,82 | 29,31 |
| Arauca                     | Fortul                 | 105,52 | 10,04 | 3,53 | 6,44  |
| Arauca                     | Saravena               | 170,04 | 20,33 | 3,19 | 3,92  |
| Arauca                     | Cravo Norte            | 168,00 | 5,81  | 3,04 | 49,92 |
| Arauca                     | Arauca                 | 118,99 | 12,87 | 1,91 | 6,32  |
| Arauca                     | Arauquita              | 88,03  | 6,57  | 1,00 | 7,30  |
| Arauca                     | Puerto Rondón          | 209,36 | 18,20 | 0,00 | 36,17 |
| Archipiélago de San Andrés | Providencia            | 38,22  | 2,91  | 0,00 | 0,00  |
| Atlántico                  | Tubará                 | 145,25 | 9,09  | 1,82 | 5,49  |
| Atlántico                  | Santo Tomás            | 149,59 | 11,88 | 1,19 | 0,40  |
| Atlántico                  | Suan                   | 194,93 | 13,55 | 1,13 | 0,00  |
| Atlántico                  | Santa Lucía            | 161,13 | 6,00  | 0,84 | 4,25  |
| Atlántico                  | Luruaco                | 127,05 | 5,62  | 0,77 | 2,24  |
| Atlántico                  | Puerto Colombia        | 182,27 | 26,52 | 0,73 | 0,00  |
| Atlántico                  | Juan de Acosta         | 70,47  | 6,77  | 0,62 | 15,29 |
| Atlántico                  | Ponedera               | 128,26 | 7,82  | 0,49 | 0,90  |
| Atlántico                  | Palmar de Varela       | 146,28 | 3,19  | 0,39 | 1,20  |
| Atlántico                  | Sabanagrande           | 123,95 | 10,07 | 0,34 | 0,64  |
| Atlántico                  | Baranoa                | 99,57  | 7,48  | 0,18 | 0,34  |
| Atlántico                  | Barranquilla           | 85,91  | 5,39  | 0,12 | 0,30  |
| Atlántico                  | Sabanalarga            | 218,27 | 3,23  | 0,10 | 1,93  |
| Atlántico                  | Malambo                | 60,83  | 5,96  | 0,09 | 0,34  |

|              |                      |        |       |      |       |
|--------------|----------------------|--------|-------|------|-------|
| Atlántico    | Soledad              | 47,22  | 4,49  | 0,03 | 0,22  |
| Atlántico    | Campo de La Cruz     | 130,85 | 1,25  | 0,00 | 1,75  |
| Atlántico    | Candelaria           | 168,10 | 2,44  | 0,00 | 0,82  |
| Atlántico    | Galapa               | 111,84 | 3,96  | 0,00 | 0,00  |
| Atlántico    | Manatí               | 109,65 | 1,96  | 0,00 | 0,63  |
| Atlántico    | Piojó                | 93,58  | 7,80  | 0,00 | 7,85  |
| Atlántico    | Polonuevo            | 168,80 | 2,65  | 0,00 | 0,00  |
| Atlántico    | Repelón              | 99,40  | 3,06  | 0,00 | 0,39  |
| Atlántico    | Usiacurí             | 125,01 | 9,61  | 0,00 | 4,27  |
| Bogotá, D.C. | Bogotá D.C.          | 108,21 | 17,49 | 0,17 | 0,13  |
| Bolívar      | Santa Rosa           | 269,88 | 10,03 | 2,11 | 2,27  |
| Bolívar      | San Juan Nepomuceno  | 140,42 | 12,01 | 1,80 | 13,54 |
| Bolívar      | Magangué             | 162,44 | 12,24 | 1,63 | 1,05  |
| Bolívar      | San Cristóbal        | 219,10 | 16,49 | 1,51 | 4,50  |
| Bolívar      | Calamar              | 153,16 | 1,83  | 1,38 | 0,86  |
| Bolívar      | Cantagallo           | 105,76 | 6,52  | 1,24 | 0,00  |
| Bolívar      | Mompós               | 125,93 | 15,83 | 1,17 | 1,14  |
| Bolívar      | El Carmen de Bolívar | 107,28 | 4,10  | 1,14 | 1,94  |
| Bolívar      | Villanueva           | 275,55 | 11,38 | 1,11 | 5,61  |
| Bolívar      | Morales              | 122,86 | 0,51  | 1,04 | 5,58  |
| Bolívar      | Arjona               | 108,00 | 2,41  | 0,94 | 0,87  |
| Bolívar      | Talaigua Nuevo       | 211,37 | 4,43  | 0,89 | 0,00  |
| Bolívar      | Zambrano             | 126,45 | 2,62  | 0,88 | 0,87  |
| Bolívar      | Clemencia            | 144,93 | 4,02  | 0,85 | 3,28  |
| Bolívar      | San Fernando         | 32,58  | 0,75  | 0,73 | 0,73  |
| Bolívar      | San Martín de Loba   | 125,49 | 9,13  | 0,66 | 3,01  |
| Bolívar      | Turbaco              | 121,58 | 7,26  | 0,62 | 1,00  |
| Bolívar      | Santa Rosa del Sur   | 63,94  | 4,86  | 0,50 | 25,72 |
| Bolívar      | Achí                 | 121,16 | 7,01  | 0,49 | 0,00  |
| Bolívar      | Pinillos             | 14,95  | 0,81  | 0,43 | 0,42  |
| Bolívar      | María La Baja        | 53,26  | 1,29  | 0,22 | 1,26  |
| Bolívar      | Cartagena            | 28,92  | 3,07  | 0,15 | 0,07  |
| Bolívar      | Altos del Rosario    | 59,12  | 3,70  | 0,00 | 0,00  |
| Bolívar      | Arenal               | 29,37  | 0,54  | 0,00 | 2,61  |
| Bolívar      | Arroyohondo          | 47,57  | 5,03  | 0,00 | 3,12  |
| Bolívar      | Barranco de Loba     | 75,09  | 5,15  | 0,00 | 0,63  |
| Bolívar      | Cicuco               | 196,41 | 17,11 | 0,00 | 0,00  |
| Bolívar      | Córdoba              | 251,74 | 2,35  | 0,00 | 1,58  |
| Bolívar      | El Guamo             | 168,75 | 5,15  | 0,00 | 3,87  |
| Bolívar      | El Peñón             | 138,75 | 3,41  | 0,00 | 4,35  |
| Bolívar      | Hatillo de Loba      | 77,60  | 3,36  | 0,00 | 0,00  |

|         |                       |        |       |       |       |
|---------|-----------------------|--------|-------|-------|-------|
| Bolívar | Mahates               | 45,93  | 1,63  | 0,00  | 0,78  |
| Bolívar | Margarita             | 29,48  | 3,08  | 0,00  | 1,06  |
| Bolívar | Montecristo           | 7,39   | 0,00  | 0,00  | 5,30  |
| Bolívar | Norosí                | 13,39  | 0,00  | 0,00  | 0,00  |
| Bolívar | Regidor               | 19,96  | 0,99  | 0,00  | 0,00  |
| Bolívar | Río Viejo             | 20,77  | 1,72  | 0,00  | 0,00  |
| Bolívar | San Estanislao        | 43,39  | 0,62  | 0,00  | 1,23  |
| Bolívar | San Jacinto           | 86,86  | 8,36  | 0,00  | 2,79  |
| Bolívar | San Jacinto del Cauca | 27,68  | 2,22  | 0,00  | 0,76  |
| Bolívar | San Pablo             | 71,46  | 6,51  | 0,00  | 0,35  |
| Bolívar | Santa Catalina        | 116,72 | 4,58  | 0,00  | 8,12  |
| Bolívar | Simití                | 54,91  | 10,60 | 0,00  | 2,56  |
| Bolívar | Soplaviento           | 60,81  | 3,58  | 0,00  | 0,00  |
| Bolívar | Tiquisio              | 35,45  | 1,88  | 0,00  | 0,00  |
| Bolívar | Turbaná               | 76,82  | 0,69  | 0,00  | 2,75  |
| Boyacá  | Cubará                | 46,20  | 1,49  | 10,42 | 32,97 |
| Boyacá  | Pisba                 | 95,30  | 7,33  | 7,05  | 0,00  |
| Boyacá  | Boavita               | 215,10 | 27,23 | 4,74  | 2,65  |
| Boyacá  | Pajarito              | 119,50 | 22,87 | 4,44  | 5,99  |
| Boyacá  | Santana               | 260,24 | 24,62 | 2,60  | 1,30  |
| Boyacá  | Muzo                  | 154,78 | 16,11 | 2,23  | 1,12  |
| Boyacá  | Miraflores            | 154,67 | 21,50 | 2,05  | 1,02  |
| Boyacá  | Boyacá                | 283,93 | 30,27 | 2,02  | 2,05  |
| Boyacá  | Togüí                 | 161,60 | 23,81 | 1,97  | 2,03  |
| Boyacá  | Labranzagrande        | 65,58  | 7,76  | 1,93  | 9,55  |
| Boyacá  | Chitaraque            | 213,68 | 35,81 | 1,76  | 1,79  |
| Boyacá  | Puerto Boyacá         | 79,88  | 26,56 | 1,45  | 3,13  |
| Boyacá  | Motavita              | 135,69 | 10,14 | 1,37  | 0,00  |
| Boyacá  | Maripí                | 80,97  | 6,63  | 1,28  | 2,69  |
| Boyacá  | Quípama               | 62,91  | 3,75  | 1,27  | 0,00  |
| Boyacá  | Soatá                 | 303,88 | 66,74 | 1,13  | 1,38  |
| Boyacá  | Tuta                  | 120,02 | 16,66 | 1,05  | 1,03  |
| Boyacá  | Umbita                | 125,24 | 12,62 | 0,98  | 0,00  |
| Boyacá  | Otanche               | 106,30 | 20,67 | 0,95  | 0,00  |
| Boyacá  | Moniquirá             | 287,87 | 51,19 | 0,93  | 1,39  |
| Boyacá  | Ráquira               | 118,66 | 8,95  | 0,73  | 2,24  |
| Boyacá  | Villa de Leyva        | 397,90 | 29,63 | 0,69  | 0,00  |
| Boyacá  | Garagoa               | 147,92 | 19,52 | 0,60  | 0,60  |
| Boyacá  | Chiquinquirá          | 128,74 | 9,77  | 0,15  | 0,30  |
| Boyacá  | Almeida               | 230,91 | 15,93 | 0,00  | 0,00  |
| Boyacá  | Aquitania             | 248,55 | 26,77 | 0,00  | 1,91  |

|        |              |        |       |      |       |
|--------|--------------|--------|-------|------|-------|
| Boyacá | Arcabuco     | 189,08 | 13,37 | 0,00 | 1,91  |
| Boyacá | Belén        | 183,93 | 25,45 | 0,00 | 5,40  |
| Boyacá | Berbeo       | 145,21 | 31,10 | 0,00 | 0,00  |
| Boyacá | Betétiva     | 81,19  | 9,10  | 0,00 | 8,61  |
| Boyacá | Briceño      | 61,95  | 7,52  | 0,00 | 0,00  |
| Boyacá | Buenavista   | 131,85 | 13,76 | 0,00 | 0,00  |
| Boyacá | Busbanzá     | 146,01 | 0,00  | 0,00 | 0,00  |
| Boyacá | Caldas       | 138,39 | 16,27 | 0,00 | 5,50  |
| Boyacá | Campohermoso | 102,55 | 18,18 | 0,00 | 12,55 |
| Boyacá | Cerinza      | 161,67 | 31,25 | 0,00 | 5,12  |
| Boyacá | Chinavita    | 199,00 | 39,12 | 0,00 | 8,42  |
| Boyacá | Chíquiza     | 112,39 | 7,03  | 0,00 | 0,00  |
| Boyacá | Chiscas      | 175,98 | 13,45 | 0,00 | 0,00  |
| Boyacá | Chita        | 183,19 | 18,36 | 0,00 | 4,10  |
| Boyacá | Chivatá      | 118,51 | 11,80 | 0,00 | 3,30  |
| Boyacá | Chivor       | 101,81 | 10,53 | 0,00 | 0,00  |
| Boyacá | Ciénega      | 104,65 | 4,14  | 0,00 | 2,13  |
| Boyacá | Cómbita      | 129,31 | 13,87 | 0,00 | 0,72  |
| Boyacá | Coper        | 183,83 | 13,32 | 0,00 | 0,00  |
| Boyacá | Corrales     | 223,74 | 8,59  | 0,00 | 0,00  |
| Boyacá | Covarachía   | 187,60 | 37,88 | 0,00 | 0,00  |
| Boyacá | Cucaíta      | 134,90 | 12,86 | 0,00 | 2,15  |
| Boyacá | Cúitiva      | 314,09 | 10,40 | 0,00 | 5,29  |
| Boyacá | Duitama      | 197,84 | 29,31 | 0,00 | 0,36  |
| Boyacá | El Cocuy     | 130,32 | 16,83 | 0,00 | 0,00  |
| Boyacá | El Espino    | 112,79 | 43,09 | 0,00 | 2,38  |
| Boyacá | Firavitoba   | 162,93 | 15,04 | 0,00 | 0,00  |
| Boyacá | Floresta     | 154,78 | 17,33 | 0,00 | 0,00  |
| Boyacá | Gachantivá   | 317,70 | 29,80 | 0,00 | 7,47  |
| Boyacá | Gameza       | 228,45 | 17,85 | 0,00 | 1,99  |
| Boyacá | Guacamayas   | 217,44 | 16,43 | 0,00 | 0,00  |
| Boyacá | Guateque     | 234,79 | 22,74 | 0,00 | 0,00  |
| Boyacá | Guayatá      | 203,57 | 9,41  | 0,00 | 1,91  |
| Boyacá | Güicán       | 61,77  | 2,75  | 0,00 | 0,00  |
| Boyacá | Iza          | 178,20 | 12,93 | 0,00 | 0,00  |
| Boyacá | Jenesano     | 181,27 | 14,44 | 0,00 | 0,00  |
| Boyacá | Jericó       | 240,26 | 4,93  | 0,00 | 0,00  |
| Boyacá | La Capilla   | 166,99 | 30,02 | 0,00 | 7,45  |
| Boyacá | La Uvita     | 171,08 | 12,03 | 0,00 | 0,00  |
| Boyacá | La Victoria  | 0,00   | 0,00  | 0,00 | 0,00  |
| Boyacá | Macanal      | 187,21 | 12,50 | 0,00 | 2,07  |

|        |                       |        |       |      |       |
|--------|-----------------------|--------|-------|------|-------|
| Boyacá | Mongua                | 116,20 | 10,29 | 0,00 | 0,00  |
| Boyacá | Monguí                | 164,40 | 28,07 | 0,00 | 2,01  |
| Boyacá | Nobsa                 | 243,02 | 37,12 | 0,00 | 0,62  |
| Boyacá | Nuevo Colón           | 168,41 | 15,49 | 0,00 | 1,55  |
| Boyacá | Oicatá                | 293,00 | 10,59 | 0,00 | 14,12 |
| Boyacá | Pachavita             | 259,49 | 19,28 | 0,00 | 0,00  |
| Boyacá | Páez                  | 179,46 | 6,92  | 0,00 | 3,43  |
| Boyacá | Paipa                 | 270,35 | 25,76 | 0,00 | 1,01  |
| Boyacá | Panqueba              | 123,04 | 63,97 | 0,00 | 0,00  |
| Boyacá | Pauna                 | 106,31 | 5,61  | 0,00 | 0,94  |
| Boyacá | Paya                  | 81,58  | 11,76 | 0,00 | 7,77  |
| Boyacá | Paz de Río            | 233,50 | 46,07 | 0,00 | 0,00  |
| Boyacá | Pesca                 | 216,88 | 17,77 | 0,00 | 1,27  |
| Boyacá | Ramiriquí             | 212,68 | 22,72 | 0,00 | 4,78  |
| Boyacá | Rondón                | 98,98  | 0,00  | 0,00 | 0,00  |
| Boyacá | Saboyá                | 128,36 | 8,05  | 0,00 | 0,80  |
| Boyacá | Sáchica               | 326,08 | 18,42 | 0,00 | 2,65  |
| Boyacá | Samacá                | 187,25 | 10,73 | 0,00 | 0,00  |
| Boyacá | San Eduardo           | 212,76 | 10,67 | 0,00 | 0,00  |
| Boyacá | San José de Pare      | 210,52 | 20,89 | 0,00 | 1,80  |
| Boyacá | San Luis de Gaceno    | 103,36 | 20,79 | 0,00 | 3,95  |
| Boyacá | San Mateo             | 288,54 | 51,75 | 0,00 | 0,00  |
| Boyacá | San Miguel de Sema    | 120,52 | 15,34 | 0,00 | 2,19  |
| Boyacá | San Pablo de Borbur   | 56,39  | 0,95  | 0,00 | 0,00  |
| Boyacá | Santa María           | 140,41 | 14,81 | 0,00 | 79,12 |
| Boyacá | Santa Rosa de Viterbo | 182,90 | 26,13 | 0,00 | 5,23  |
| Boyacá | Santa Sofía           | 233,17 | 21,59 | 0,00 | 0,00  |
| Boyacá | Sativanorte           | 157,56 | 20,79 | 0,00 | 0,00  |
| Boyacá | Sativasur             | 171,05 | 17,10 | 0,00 | 0,00  |
| Boyacá | Siachoque             | 127,27 | 14,52 | 0,00 | 6,70  |
| Boyacá | Socha                 | 156,08 | 28,98 | 0,00 | 0,00  |
| Boyacá | Socotá                | 97,85  | 8,32  | 0,00 | 1,12  |
| Boyacá | Sogamoso              | 309,92 | 31,18 | 0,00 | 0,35  |
| Boyacá | Somondoco             | 198,97 | 24,60 | 0,00 | 0,00  |
| Boyacá | Sora                  | 142,34 | 3,31  | 0,00 | 0,00  |
| Boyacá | Soracá                | 227,22 | 11,24 | 0,00 | 1,89  |
| Boyacá | Sotaquirá             | 110,97 | 12,98 | 0,00 | 0,00  |
| Boyacá | Susacón               | 141,46 | 34,33 | 0,00 | 5,95  |
| Boyacá | Sutamarchán           | 161,35 | 6,69  | 0,00 | 0,00  |
| Boyacá | Sutatenza             | 149,76 | 24,29 | 0,00 | 0,00  |
| Boyacá | Tasco                 | 193,49 | 18,53 | 0,00 | 0,00  |



|        |              |        |       |      |      |
|--------|--------------|--------|-------|------|------|
| Boyacá | Tenza        | 190,53 | 26,16 | 0,00 | 4,94 |
| Boyacá | Tibaná       | 238,56 | 25,83 | 0,00 | 1,09 |
| Boyacá | Tibasosa     | 177,12 | 21,67 | 0,00 | 0,00 |
| Boyacá | Tinjacá      | 244,60 | 26,45 | 0,00 | 0,00 |
| Boyacá | Tipacoque    | 169,62 | 30,32 | 0,00 | 6,05 |
| Boyacá | Toca         | 83,49  | 2,92  | 0,00 | 0,99 |
| Boyacá | Tópaga       | 216,58 | 5,41  | 0,00 | 0,00 |
| Boyacá | Tota         | 167,37 | 9,06  | 0,00 | 1,82 |
| Boyacá | Tunja        | 184,66 | 14,69 | 0,00 | 0,32 |
| Boyacá | Tununguá     | 99,88  | 16,30 | 0,00 | 5,92 |
| Boyacá | Turmequé     | 145,12 | 39,21 | 0,00 | 0,00 |
| Boyacá | Tutazá       | 165,14 | 21,18 | 0,00 | 0,00 |
| Boyacá | Ventaquemada | 149,56 | 4,61  | 0,00 | 0,65 |
| Boyacá | Viracachá    | 226,04 | 30,52 | 0,00 | 3,05 |
| Boyacá | Zetaquirá    | 157,95 | 12,95 | 0,00 | 0,00 |
| Caldas | Norcasia     | 228,59 | 32,19 | 6,15 | 1,48 |
| Caldas | Viterbo      | 139,37 | 29,94 | 4,76 | 3,17 |
| Caldas | Victoria     | 327,54 | 53,46 | 3,45 | 4,73 |
| Caldas | Marulanda    | 29,22  | 8,76  | 2,90 | 0,00 |
| Caldas | Palestina    | 328,91 | 28,57 | 2,78 | 1,12 |
| Caldas | Marquetalia  | 143,14 | 15,38 | 2,01 | 0,00 |
| Caldas | Chinchiná    | 330,84 | 32,80 | 1,70 | 0,77 |
| Caldas | Aranzazu     | 204,91 | 20,53 | 1,66 | 2,66 |
| Caldas | Samaná       | 132,84 | 25,26 | 1,55 | 2,33 |
| Caldas | San José     | 191,15 | 27,68 | 1,32 | 0,00 |
| Caldas | Pensilvania  | 120,94 | 17,44 | 1,14 | 1,14 |
| Caldas | Neira        | 111,32 | 13,37 | 1,03 | 0,68 |
| Caldas | Risaralda    | 183,11 | 17,27 | 0,96 | 0,00 |
| Caldas | Riosucio     | 168,97 | 15,00 | 0,88 | 0,33 |
| Caldas | Anserma      | 141,93 | 19,67 | 0,87 | 0,00 |
| Caldas | Belalcázar   | 338,35 | 37,11 | 0,86 | 1,82 |
| Caldas | La Dorada    | 97,84  | 21,30 | 0,79 | 0,91 |
| Caldas | Supía        | 88,63  | 15,15 | 0,77 | 0,75 |
| Caldas | Manizales    | 215,01 | 25,75 | 0,34 | 0,49 |
| Caldas | Villamaría   | 204,37 | 19,78 | 0,21 | 0,94 |
| Caldas | Aguadas      | 131,19 | 26,17 | 0,00 | 0,42 |
| Caldas | Filadelfia   | 155,64 | 16,63 | 0,00 | 0,91 |
| Caldas | La Merced    | 186,36 | 36,58 | 0,00 | 0,00 |
| Caldas | Manzanares   | 120,83 | 13,92 | 0,00 | 0,84 |
| Caldas | Marmato      | 160,88 | 12,45 | 0,00 | 0,00 |
| Caldas | Pácora       | 280,57 | 28,10 | 0,00 | 0,00 |

|          |                        |        |       |       |       |
|----------|------------------------|--------|-------|-------|-------|
| Caldas   | Salamina               | 138,72 | 25,78 | 0,00  | 1,12  |
| Caquetá  | Albania                | 79,63  | 4,67  | 1,56  | 0,00  |
| Caquetá  | San Vicente del Caguán | 66,82  | 4,18  | 0,89  | 0,59  |
| Caquetá  | Florencia              | 332,17 | 19,90 | 0,81  | 0,36  |
| Caquetá  | San José del Fragua    | 92,84  | 8,15  | 0,68  | 4,79  |
| Caquetá  | El Paujil              | 93,26  | 12,25 | 0,55  | 2,97  |
| Caquetá  | La Montañita           | 23,09  | 2,97  | 0,42  | 3,36  |
| Caquetá  | Solano                 | 19,02  | 1,28  | 0,41  | 0,00  |
| Caquetá  | Belén de los Andaquies | 61,15  | 9,61  | 0,00  | 7,93  |
| Caquetá  | Cartagena del Chairá   | 38,32  | 3,66  | 0,00  | 1,49  |
| Caquetá  | Curillo                | 65,72  | 12,90 | 0,00  | 6,84  |
| Caquetá  | El Doncello            | 79,83  | 11,79 | 0,00  | 0,45  |
| Caquetá  | Milán                  | 29,18  | 1,71  | 0,00  | 0,00  |
| Caquetá  | Morelia                | 70,94  | 7,90  | 0,00  | 2,61  |
| Caquetá  | Puerto Rico            | 19,30  | 5,99  | 0,00  | 4,23  |
| Caquetá  | Solita                 | 66,71  | 5,47  | 0,00  | 1,09  |
| Caquetá  | Valparaíso             | 47,02  | 5,21  | 0,00  | 0,00  |
| Casanare | San Luis de Palenque   | 171,35 | 16,96 | 23,65 | 54,46 |
| Casanare | Nunchía                | 198,42 | 16,03 | 15,02 | 94,34 |
| Casanare | Orocué                 | 162,14 | 28,23 | 12,28 | 38,55 |
| Casanare | Trinidad               | 144,74 | 20,74 | 11,92 | 26,98 |
| Casanare | Hato Corozal           | 111,82 | 5,98  | 7,84  | 32,51 |
| Casanare | Monterrey              | 223,58 | 34,09 | 5,88  | 8,56  |
| Casanare | Támara                 | 174,34 | 8,50  | 5,67  | 7,08  |
| Casanare | Maní                   | 259,29 | 25,13 | 4,48  | 7,18  |
| Casanare | Paz de Ariporo         | 165,11 | 16,86 | 2,99  | 39,91 |
| Casanare | Aguazul                | 253,04 | 32,30 | 2,86  | 5,22  |
| Casanare | Pore                   | 266,22 | 25,24 | 2,52  | 78,16 |
| Casanare | Tauramena              | 213,25 | 30,65 | 2,49  | 9,83  |
| Casanare | Villanueva             | 258,92 | 44,32 | 2,18  | 1,32  |
| Casanare | Yopal                  | 160,94 | 28,32 | 1,99  | 9,40  |
| Casanare | Chameza                | 96,96  | 4,07  | 0,00  | 0,00  |
| Casanare | La Salina              | 65,15  | 6,97  | 0,00  | 0,00  |
| Casanare | Recetor                | 11,59  | 0,00  | 0,00  | 37,90 |
| Casanare | Sabanalarga            | 55,62  | 73,74 | 0,00  | 6,15  |
| Casanare | Sácama                 | 192,04 | 9,83  | 0,00  | 15,20 |
| Cauca    | Guapi                  | 88,29  | 6,75  | 6,07  | 3,40  |
| Cauca    | Florencia              | 121,21 | 32,70 | 3,27  | 4,90  |
| Cauca    | Villa Rica             | 379,60 | 36,52 | 1,99  | 1,90  |
| Cauca    | Timbiquí               | 26,67  | 0,46  | 1,86  | 0,47  |
| Cauca    | Piamonte               | 78,15  | 17,88 | 1,37  | 0,00  |

|       |                        |        |       |      |       |
|-------|------------------------|--------|-------|------|-------|
| Cauca | Santander de Quilichao | 356,92 | 72,60 | 1,35 | 4,27  |
| Cauca | Caloto                 | 352,75 | 34,75 | 1,14 | 3,41  |
| Cauca | Toribio                | 225,92 | 10,96 | 1,10 | 2,84  |
| Cauca | La Sierra              | 314,41 | 17,76 | 0,93 | 2,81  |
| Cauca | Patía                  | 217,62 | 41,44 | 0,85 | 2,00  |
| Cauca | Rosas                  | 361,66 | 41,24 | 0,76 | 11,64 |
| Cauca | San Sebastián          | 158,31 | 16,15 | 0,73 | 1,47  |
| Cauca | Mercaderes             | 153,32 | 28,89 | 0,56 | 0,56  |
| Cauca | Miranda                | 186,22 | 26,37 | 0,51 | 0,54  |
| Cauca | López                  | 26,40  | 0,00  | 0,50 | 0,00  |
| Cauca | Popayán                | 255,04 | 28,00 | 0,44 | 1,72  |
| Cauca | Silvia                 | 171,31 | 18,21 | 0,31 | 2,81  |
| Cauca | Timbío                 | 410,16 | 44,36 | 0,30 | 7,29  |
| Cauca | Piendamó               | 277,76 | 31,92 | 0,23 | 1,26  |
| Cauca | La Vega                | 114,15 | 7,89  | 0,22 | 15,83 |
| Cauca | Puerto Tejada          | 216,57 | 21,87 | 0,22 | 1,99  |
| Cauca | El Tambo               | 116,57 | 8,90  | 0,21 | 4,90  |
| Cauca | Almaguer               | 119,84 | 9,01  | 0,00 | 5,25  |
| Cauca | Argelia                | 96,38  | 6,43  | 0,00 | 0,40  |
| Cauca | Balboa                 | 128,24 | 11,13 | 0,00 | 0,00  |
| Cauca | Bolívar                | 76,64  | 13,48 | 0,00 | 8,07  |
| Cauca | Buenos Aires           | 123,38 | 15,94 | 0,00 | 0,95  |
| Cauca | Cajibío                | 149,10 | 9,94  | 0,00 | 2,66  |
| Cauca | Caldono                | 103,00 | 12,19 | 0,00 | 8,27  |
| Cauca | Corinto                | 178,65 | 24,28 | 0,00 | 1,62  |
| Cauca | Guachené               | 166,37 | 6,07  | 0,00 | 0,50  |
| Cauca | Inzá                   | 146,48 | 9,31  | 0,00 | 0,66  |
| Cauca | Jambaló                | 96,45  | 8,28  | 0,00 | 1,15  |
| Cauca | Morales                | 16,84  | 9,31  | 0,00 | 11,45 |
| Cauca | Padilla                | 397,89 | 27,50 | 0,00 | 1,26  |
| Cauca | Paez                   | 89,13  | 7,55  | 0,00 | 0,88  |
| Cauca | Puracé                 | 267,80 | 17,71 | 0,00 | 0,66  |
| Cauca | Santa Rosa             | 58,53  | 4,89  | 0,00 | 3,03  |
| Cauca | Sotara                 | 128,20 | 14,48 | 0,00 | 0,00  |
| Cauca | Suárez                 | 105,57 | 23,99 | 0,00 | 18,05 |
| Cauca | Sucre                  | 38,43  | 19,11 | 0,00 | 3,37  |
| Cauca | Totoró                 | 169,80 | 10,56 | 0,00 | 2,99  |
| Cesar | Pailitas               | 164,89 | 10,58 | 1,18 | 0,58  |
| Cesar | San Martín             | 157,59 | 13,14 | 1,12 | 8,34  |
| Cesar | El Paso                | 27,32  | 1,31  | 0,90 | 11,53 |
| Cesar | El Copey               | 151,12 | 5,35  | 0,76 | 14,87 |

|       |                         |        |       |       |       |
|-------|-------------------------|--------|-------|-------|-------|
| Cesar | Becerril                | 162,97 | 5,92  | 0,74  | 1,47  |
| Cesar | Gamarra                 | 24,59  | 2,53  | 0,66  | 0,63  |
| Cesar | Chimichagua             | 88,17  | 1,31  | 0,65  | 0,98  |
| Cesar | Aguachica               | 54,00  | 5,79  | 0,57  | 1,96  |
| Cesar | Pelaya                  | 129,47 | 7,33  | 0,57  | 2,26  |
| Cesar | Astrea                  | 66,25  | 2,63  | 0,52  | 3,65  |
| Cesar | San Alberto             | 81,29  | 9,25  | 0,48  | 0,41  |
| Cesar | Chiriguaná              | 92,00  | 4,51  | 0,46  | 0,00  |
| Cesar | Pueblo Bello            | 50,76  | 1,37  | 0,46  | 0,44  |
| Cesar | La Paz                  | 91,20  | 3,51  | 0,44  | 4,46  |
| Cesar | Curumaní                | 140,60 | 9,27  | 0,40  | 3,13  |
| Cesar | Valledupar              | 37,65  | 3,17  | 0,27  | 0,75  |
| Cesar | Agustín Codazzi         | 68,10  | 3,31  | 0,19  | 5,49  |
| Cesar | Bosconia                | 10,35  | 0,00  | 0,00  | 1,69  |
| Cesar | González                | 74,79  | 20,50 | 0,00  | 0,00  |
| Cesar | La Gloria               | 85,50  | 7,66  | 0,00  | 1,53  |
| Cesar | La Jaqua de Ibirico     | 152,43 | 5,39  | 0,00  | 2,70  |
| Cesar | Manaure                 | 8,00   | 4,89  | 0,00  | 0,00  |
| Cesar | Río de Oro              | 109,22 | 9,24  | 0,00  | 11,94 |
| Cesar | San Diego               | 75,27  | 2,99  | 0,00  | 17,78 |
| Cesar | Tamalameque             | 69,11  | 5,05  | 0,00  | 2,88  |
| Choco | Riosucio                | 1,40   | 0,00  | 0,00  | 0,00  |
| Chocó | Nuquí                   | 2,44   | 0,00  | 12,92 | 25,01 |
| Chocó | Medio Baudó             | 0,00   | 0,00  | 8,85  | 0,00  |
| Chocó | El Litoral del San Juan | 1,42   | 0,00  | 1,42  | 0,00  |
| Chocó | Bajo Baudó              | 2,31   | 0,00  | 1,17  | 29,79 |
| Chocó | Acandí                  | 6,05   | 0,00  | 1,03  | 1,02  |
| Chocó | Unguía                  | 2,00   | 0,00  | 0,66  | 0,00  |
| Chocó | Medio Atrato            | 0,00   | 0,35  | 0,36  | 0,00  |
| Chocó | Alto Baudo              | 1,17   | 0,00  | 0,30  | 7,98  |
| Chocó | Quibdó                  | 13,87  | 1,30  | 0,09  | 0,17  |
| Chocó | Atrato                  | 6,13   | 1,06  | 0,00  | 0,00  |
| Chocó | Bagadó                  | 3,71   | 1,24  | 0,00  | 0,00  |
| Chocó | Bahía Solano            | 16,14  | 0,00  | 0,00  | 0,00  |
| Chocó | Belén de Bajira         | 0,00   | 0,00  | 0,00  | 0,00  |
| Chocó | Bojaya                  | 0,99   | 0,99  | 0,00  | 19,99 |
| Chocó | Carmen del Darien       | 10,96  | 0,00  | 0,00  | 0,00  |
| Chocó | Cértegui                | 1,01   | 0,00  | 0,00  | 0,00  |
| Chocó | Condoto                 | 28,69  | 2,89  | 0,00  | 0,00  |
| Chocó | El Cantón del San Pablo | 4,06   | 1,35  | 0,00  | 1,35  |
| Chocó | El Carmen de Atrato     | 32,07  | 5,38  | 0,00  | 0,00  |

|         |                         |        |       |      |       |
|---------|-------------------------|--------|-------|------|-------|
| Chocó   | Istmina                 | 2,01   | 0,00  | 0,00 | 0,00  |
| Chocó   | Juradó                  | 11,74  | 2,94  | 0,00 | 0,00  |
| Chocó   | Lloró                   | 1,87   | 0,00  | 0,00 | 0,00  |
| Chocó   | Medio San Juan          | 7,98   | 0,70  | 0,00 | 15,61 |
| Chocó   | Nóvita                  | 6,31   | 0,00  | 0,00 | 0,00  |
| Chocó   | Río Iro                 | 2,30   | 0,00  | 0,00 | 1,15  |
| Chocó   | Río Quito               | 7,11   | 0,00  | 0,00 | 0,00  |
| Chocó   | San José del Palmar     | 26,45  | 8,17  | 0,00 | 6,16  |
| Chocó   | Sipí                    | 0,00   | 0,00  | 0,00 | 0,00  |
| Chocó   | Tadó                    | 3,74   | 0,00  | 0,00 | 0,00  |
| Chocó   | Unión Panamericana      | 1,11   | 1,11  | 0,00 | 0,00  |
| Córdoba | Chinú                   | 112,51 | 7,21  | 2,37 | 2,92  |
| Córdoba | Lorica                  | 121,43 | 8,66  | 1,73 | 5,78  |
| Córdoba | Sahagún                 | 156,42 | 9,29  | 1,46 | 6,82  |
| Córdoba | Chimá                   | 22,30  | 0,00  | 1,38 | 1,36  |
| Córdoba | Montería                | 105,27 | 11,16 | 1,10 | 1,44  |
| Córdoba | San Antero              | 137,60 | 8,90  | 1,04 | 4,27  |
| Córdoba | Buenavista              | 177,48 | 6,73  | 0,95 | 2,45  |
| Córdoba | San José de Uré         | 11,97  | 1,82  | 0,90 | 0,00  |
| Córdoba | Montelíbano             | 60,25  | 8,54  | 0,76 | 0,13  |
| Córdoba | Cotorra                 | 118,85 | 6,51  | 0,66 | 1,30  |
| Córdoba | Ciénaga de Oro          | 109,09 | 6,02  | 0,63 | 2,86  |
| Córdoba | Planeta Rica            | 18,39  | 1,36  | 0,61 | 0,89  |
| Córdoba | Tuchín                  | 55,14  | 0,52  | 0,57 | 3,94  |
| Córdoba | Tierralta               | 44,17  | 3,96  | 0,53 | 1,43  |
| Córdoba | Los Córdoba             | 74,37  | 2,54  | 0,46 | 5,65  |
| Córdoba | Moñitos                 | 21,97  | 0,36  | 0,36 | 1,86  |
| Córdoba | San Bernardo del Viento | 129,24 | 5,89  | 0,29 | 4,05  |
| Córdoba | Pueblo Nuevo            | 44,27  | 1,10  | 0,28 | 0,81  |
| Córdoba | San Andrés Sotavento    | 93,38  | 2,77  | 0,27 | 5,09  |
| Córdoba | San Pelayo              | 23,48  | 1,43  | 0,24 | 0,92  |
| Córdoba | Valencia                | 89,21  | 3,20  | 0,23 | 1,22  |
| Córdoba | Ayapel                  | 45,47  | 3,37  | 0,00 | 0,59  |
| Córdoba | Canalete                | 59,05  | 2,00  | 0,00 | 8,27  |
| Córdoba | Cereté                  | 111,66 | 7,30  | 0,00 | 0,88  |
| Córdoba | La Apartada             | 24,73  | 2,10  | 0,00 | 0,00  |
| Córdoba | Momil                   | 141,51 | 12,24 | 0,00 | 18,39 |
| Córdoba | Puerto Escondido        | 38,90  | 4,12  | 0,00 | 3,47  |
| Córdoba | Puerto Libertador       | 46,70  | 3,45  | 0,00 | 0,68  |
| Córdoba | Purísima                | 89,88  | 5,32  | 0,00 | 3,33  |
| Córdoba | San Carlos              | 102,34 | 3,41  | 0,00 | 7,78  |

|              |                            |        |       |      |       |
|--------------|----------------------------|--------|-------|------|-------|
| Cundinamarca | Paratebueno                | 198,29 | 32,67 | 6,54 | 7,84  |
| Cundinamarca | Jerusalén                  | 208,29 | 26,04 | 3,73 | 3,73  |
| Cundinamarca | Ricaurte                   | 283,40 | 39,07 | 3,22 | 1,12  |
| Cundinamarca | Villeta                    | 319,32 | 47,67 | 2,81 | 0,40  |
| Cundinamarca | Agua de Dios               | 267,42 | 50,83 | 2,74 | 0,00  |
| Cundinamarca | Apulo                      | 328,93 | 65,27 | 2,56 | 5,12  |
| Cundinamarca | Gama                       | 128,67 | 27,72 | 2,49 | 0,00  |
| Cundinamarca | San Antonio del Tequendama | 232,16 | 17,72 | 2,32 | 0,76  |
| Cundinamarca | Topaipí                    | 21,96  | 4,41  | 2,13 | 0,00  |
| Cundinamarca | Quebradanegra              | 112,19 | 8,46  | 2,12 | 0,00  |
| Cundinamarca | Supatá                     | 169,42 | 19,91 | 2,00 | 0,00  |
| Cundinamarca | Medina                     | 102,45 | 14,91 | 2,00 | 1,99  |
| Cundinamarca | Zipacón                    | 251,10 | 27,49 | 1,83 | 1,78  |
| Cundinamarca | Gachala                    | 163,16 | 6,95  | 1,75 | 1,74  |
| Cundinamarca | Guachetá                   | 304,86 | 7,88  | 1,74 | 7,89  |
| Cundinamarca | Arbeláez                   | 194,50 | 27,08 | 1,68 | 0,82  |
| Cundinamarca | Fomeque                    | 291,98 | 18,88 | 1,64 | 0,00  |
| Cundinamarca | Quetame                    | 138,28 | 18,61 | 1,48 | 66,06 |
| Cundinamarca | La Vega                    | 213,53 | 35,55 | 1,41 | 0,00  |
| Cundinamarca | Granada                    | 97,94  | 19,42 | 1,15 | 0,00  |
| Cundinamarca | San Francisco              | 93,74  | 40,98 | 1,09 | 2,20  |
| Cundinamarca | San Juan de Río Seco       | 148,64 | 16,52 | 1,03 | 1,03  |
| Cundinamarca | La Mesa                    | 240,14 | 34,20 | 0,98 | 1,30  |
| Cundinamarca | El Colegio                 | 243,78 | 58,04 | 0,94 | 1,37  |
| Cundinamarca | Silvania                   | 363,61 | 31,48 | 0,92 | 0,91  |
| Cundinamarca | Choachí                    | 249,09 | 23,01 | 0,91 | 2,77  |
| Cundinamarca | Guaduas                    | 142,70 | 24,35 | 0,83 | 1,65  |
| Cundinamarca | Girardot                   | 209,74 | 39,37 | 0,77 | 0,69  |
| Cundinamarca | Viotá                      | 318,54 | 57,58 | 0,75 | 2,99  |
| Cundinamarca | Nilo                       | 111,19 | 16,12 | 0,59 | 0,56  |
| Cundinamarca | Tenjo                      | 301,48 | 28,52 | 0,52 | 3,03  |
| Cundinamarca | Tabio                      | 237,78 | 19,13 | 0,45 | 1,12  |
| Cundinamarca | Sibaté                     | 199,84 | 16,11 | 0,30 | 0,28  |
| Cundinamarca | Fusagasugá                 | 176,38 | 22,44 | 0,23 | 0,39  |
| Cundinamarca | Madrid                     | 213,22 | 16,45 | 0,13 | 0,66  |
| Cundinamarca | Soacha                     | 120,42 | 15,29 | 0,07 | 0,32  |
| Cundinamarca | Albán                      | 144,41 | 10,08 | 0,00 | 1,68  |
| Cundinamarca | Anapoima                   | 231,94 | 27,00 | 0,00 | 0,75  |
| Cundinamarca | Anolaima                   | 267,31 | 26,11 | 0,00 | 1,61  |
| Cundinamarca | Beltrán                    | 42,26  | 14,19 | 0,00 | 0,00  |
| Cundinamarca | Bituima                    | 109,78 | 11,90 | 0,00 | 0,00  |

|              |                     |        |       |      |      |
|--------------|---------------------|--------|-------|------|------|
| Cundinamarca | Bojacá              | 234,70 | 16,85 | 0,00 | 0,91 |
| Cundinamarca | Cabrera             | 105,27 | 13,14 | 0,00 | 0,00 |
| Cundinamarca | Cachipay            | 148,12 | 14,21 | 0,00 | 0,00 |
| Cundinamarca | Cajicá              | 261,17 | 23,22 | 0,00 | 1,26 |
| Cundinamarca | Caparrapí           | 45,62  | 6,60  | 0,00 | 0,00 |
| Cundinamarca | Caqueza             | 270,94 | 32,02 | 0,00 | 1,77 |
| Cundinamarca | Carmen de Carupa    | 137,12 | 4,44  | 0,00 | 2,23 |
| Cundinamarca | Chaguaní            | 127,60 | 17,56 | 0,00 | 2,51 |
| Cundinamarca | Chía                | 178,86 | 17,69 | 0,00 | 0,74 |
| Cundinamarca | Chipaque            | 265,49 | 25,00 | 0,00 | 0,00 |
| Cundinamarca | Chocontá            | 121,57 | 6,07  | 0,00 | 0,84 |
| Cundinamarca | Cogua               | 141,44 | 11,53 | 0,00 | 0,98 |
| Cundinamarca | Cota                | 367,38 | 32,60 | 0,00 | 0,79 |
| Cundinamarca | Cucunubá            | 216,59 | 5,43  | 0,00 | 2,75 |
| Cundinamarca | El Peñón            | 71,85  | 6,21  | 0,00 | 0,00 |
| Cundinamarca | El Rosal            | 325,12 | 18,67 | 0,00 | 3,56 |
| Cundinamarca | Facatativá          | 226,31 | 18,41 | 0,00 | 0,33 |
| Cundinamarca | Fosca               | 110,25 | 11,17 | 0,00 | 0,00 |
| Cundinamarca | Funza               | 166,31 | 25,68 | 0,00 | 0,00 |
| Cundinamarca | Fúquene             | 179,25 | 10,89 | 0,00 | 5,34 |
| Cundinamarca | Gachancipá          | 223,80 | 11,92 | 0,00 | 0,75 |
| Cundinamarca | Gachetá             | 193,93 | 13,63 | 0,00 | 0,91 |
| Cundinamarca | Guasca              | 390,12 | 36,57 | 0,00 | 2,09 |
| Cundinamarca | Guataquí            | 132,01 | 7,80  | 0,00 | 0,00 |
| Cundinamarca | Guatavita           | 216,00 | 17,55 | 0,00 | 0,00 |
| Cundinamarca | Guayabal de Siquima | 195,43 | 24,76 | 0,00 | 0,00 |
| Cundinamarca | Guayabetal          | 314,99 | 32,81 | 0,00 | 0,00 |
| Cundinamarca | Gutiérrez           | 165,32 | 7,75  | 0,00 | 2,65 |
| Cundinamarca | Junín               | 141,75 | 18,74 | 0,00 | 0,00 |
| Cundinamarca | La Calera           | 345,70 | 39,23 | 0,00 | 1,91 |
| Cundinamarca | La Palma            | 94,26  | 9,45  | 0,00 | 0,00 |
| Cundinamarca | La Peña             | 159,64 | 21,36 | 0,00 | 1,42 |
| Cundinamarca | Lenguazaque         | 108,29 | 6,82  | 0,00 | 1,01 |
| Cundinamarca | Macheta             | 161,61 | 12,28 | 0,00 | 0,00 |
| Cundinamarca | Manta               | 224,09 | 25,54 | 0,00 | 4,26 |
| Cundinamarca | Mosquera            | 153,40 | 25,76 | 0,00 | 0,13 |
| Cundinamarca | Nariño              | 140,48 | 32,37 | 0,00 | 0,00 |
| Cundinamarca | Nemocón             | 178,23 | 15,38 | 0,00 | 0,78 |
| Cundinamarca | Nimaima             | 55,19  | 8,22  | 0,00 | 1,56 |
| Cundinamarca | Nocaima             | 114,38 | 10,06 | 0,00 | 0,00 |
| Cundinamarca | Pacho               | 152,76 | 17,43 | 0,00 | 1,11 |

|              |                             |        |       |      |      |
|--------------|-----------------------------|--------|-------|------|------|
| Cundinamarca | Paima                       | 39,36  | 8,81  | 0,00 | 2,22 |
| Cundinamarca | Pandi                       | 214,22 | 32,16 | 0,00 | 0,00 |
| Cundinamarca | Pasca                       | 126,25 | 14,13 | 0,00 | 0,00 |
| Cundinamarca | Puerto Salgar               | 113,53 | 23,57 | 0,00 | 0,55 |
| Cundinamarca | Pulí                        | 127,80 | 6,74  | 0,00 | 0,00 |
| Cundinamarca | Quipile                     | 132,15 | 14,69 | 0,00 | 0,00 |
| Cundinamarca | San Bernardo                | 146,50 | 20,75 | 0,00 | 0,96 |
| Cundinamarca | San Cayetano                | 46,85  | 9,36  | 0,00 | 0,00 |
| Cundinamarca | Sasaima                     | 380,94 | 34,06 | 0,00 | 0,95 |
| Cundinamarca | Sesquilé                    | 225,73 | 22,38 | 0,00 | 0,82 |
| Cundinamarca | Simijaca                    | 228,39 | 27,98 | 0,00 | 2,34 |
| Cundinamarca | Sopó                        | 210,68 | 15,72 | 0,00 | 0,73 |
| Cundinamarca | Subachoque                  | 207,46 | 17,51 | 0,00 | 1,88 |
| Cundinamarca | Suesca                      | 231,85 | 13,14 | 0,00 | 1,78 |
| Cundinamarca | Susa                        | 67,12  | 5,10  | 0,00 | 1,87 |
| Cundinamarca | Sutatausa                   | 183,12 | 2,01  | 0,00 | 2,01 |
| Cundinamarca | Tausa                       | 184,20 | 6,92  | 0,00 | 1,18 |
| Cundinamarca | Tena                        | 159,36 | 12,43 | 0,00 | 2,27 |
| Cundinamarca | Tibacuy                     | 227,87 | 16,58 | 0,00 | 2,07 |
| Cundinamarca | Tibirita                    | 337,74 | 23,66 | 0,00 | 3,36 |
| Cundinamarca | Tocaima                     | 255,91 | 43,38 | 0,00 | 1,09 |
| Cundinamarca | Tocancipá                   | 172,00 | 9,54  | 0,00 | 1,00 |
| Cundinamarca | Ubalá                       | 127,04 | 11,96 | 0,00 | 4,58 |
| Cundinamarca | Ubaque                      | 332,23 | 22,03 | 0,00 | 3,16 |
| Cundinamarca | Une                         | 149,52 | 13,71 | 0,00 | 1,12 |
| Cundinamarca | Útica                       | 146,32 | 48,10 | 0,00 | 4,01 |
| Cundinamarca | Venecia                     | 190,81 | 27,12 | 0,00 | 2,46 |
| Cundinamarca | Vergara                     | 130,39 | 18,26 | 0,00 | 0,00 |
| Cundinamarca | Vianí                       | 182,29 | 19,11 | 0,00 | 4,76 |
| Cundinamarca | Villa de San Diego de Ubate | 208,31 | 16,14 | 0,00 | 2,07 |
| Cundinamarca | Villagómez                  | 64,59  | 23,06 | 0,00 | 0,00 |
| Cundinamarca | Villapinzón                 | 60,24  | 7,24  | 0,00 | 0,00 |
| Cundinamarca | Yacopí                      | 36,77  | 10,11 | 0,00 | 0,60 |
| Cundinamarca | Zipaquirá                   | 127,65 | 15,10 | 0,00 | 0,50 |
| Guainía      | Puerto Colombia             | 2,30   | 0,00  | 4,61 | 0,00 |
| Guainía      | Inírida                     | 137,36 | 28,18 | 4,11 | 1,50 |
| Guainía      | Barranco Minas              | 6,28   | 2,08  | 0,00 | 0,00 |
| Guainía      | Cacahual                    | 0,00   | 0,00  | 0,00 | 0,00 |
| Guainía      | La Guadalupe                | 0,00   | 0,00  | 0,00 | 0,00 |
| Guainía      | Mapiripana                  | 0,00   | 0,00  | 0,00 | 0,00 |
| Guainía      | Morichal                    | 0,00   | 0,00  | 0,00 | 0,00 |



|          |                       |        |       |      |      |
|----------|-----------------------|--------|-------|------|------|
| Guainía  | Pana Pana             | 0,00   | 0,00  | 0,00 | 0,00 |
| Guainía  | San Felipe            | 21,13  | 0,00  | 0,00 | 0,00 |
| Guaviare | San José del Guaviare | 91,30  | 15,01 | 1,15 | 0,80 |
| Guaviare | Miraflores            | 56,24  | 5,02  | 0,73 | 0,00 |
| Guaviare | El Retorno            | 51,43  | 7,65  | 0,48 | 0,96 |
| Guaviare | Calamar               | 46,41  | 29,89 | 0,00 | 5,06 |
| Huila    | Agrado                | 219,55 | 18,95 | 2,29 | 0,00 |
| Huila    | Neiva                 | 216,21 | 43,51 | 1,99 | 0,60 |
| Huila    | Paicol                | 191,32 | 49,23 | 1,81 | 0,00 |
| Huila    | Timaná                | 166,35 | 15,79 | 1,49 | 0,49 |
| Huila    | Hobo                  | 103,79 | 10,20 | 1,44 | 0,00 |
| Huila    | Teruel                | 229,16 | 16,40 | 1,20 | 0,00 |
| Huila    | Baraya                | 135,80 | 17,73 | 1,04 | 0,00 |
| Huila    | Palestina             | 120,63 | 5,30  | 0,86 | 0,00 |
| Huila    | Tarqui                | 67,73  | 5,10  | 0,57 | 0,00 |
| Huila    | Garzón                | 94,03  | 11,58 | 0,49 | 0,49 |
| Huila    | Pitalito              | 155,69 | 10,68 | 0,44 | 0,44 |
| Huila    | Algeciras             | 125,13 | 15,21 | 0,42 | 0,82 |
| Huila    | Isnos                 | 77,77  | 1,54  | 0,41 | 0,00 |
| Huila    | Aipe                  | 113,44 | 12,29 | 0,38 | 0,40 |
| Huila    | Acevedo               | 127,30 | 7,53  | 0,36 | 0,30 |
| Huila    | San Agustín           | 192,24 | 9,48  | 0,31 | 0,61 |
| Huila    | Palermo               | 136,38 | 15,31 | 0,31 | 2,30 |
| Huila    | Gigante               | 60,16  | 8,83  | 0,31 | 0,00 |
| Huila    | La Plata              | 91,80  | 8,37  | 0,18 | 0,17 |
| Huila    | Altamira              | 80,62  | 2,28  | 0,00 | 0,00 |
| Huila    | Campoalegre           | 103,85 | 8,79  | 0,00 | 0,29 |
| Huila    | Colombia              | 96,87  | 8,13  | 0,00 | 0,00 |
| Huila    | Elías                 | 135,31 | 20,55 | 0,00 | 0,00 |
| Huila    | Guadalupe             | 100,35 | 19,58 | 0,00 | 0,00 |
| Huila    | Iquira                | 79,42  | 5,00  | 0,00 | 0,00 |
| Huila    | La Argentina          | 104,30 | 10,55 | 0,00 | 0,00 |
| Huila    | Nátaga                | 158,36 | 11,31 | 0,00 | 0,00 |
| Huila    | Oporapa               | 118,08 | 6,17  | 0,00 | 0,00 |
| Huila    | Pital                 | 173,02 | 22,10 | 0,00 | 0,00 |
| Huila    | Rivera                | 258,74 | 27,73 | 0,00 | 0,58 |
| Huila    | Saladoblanco          | 174,60 | 6,14  | 0,00 | 1,77 |
| Huila    | Santa María           | 121,80 | 4,47  | 0,00 | 0,00 |
| Huila    | Suaza                 | 185,49 | 13,55 | 0,00 | 0,00 |
| Huila    | Tello                 | 67,15  | 8,49  | 0,00 | 0,00 |
| Huila    | Tesalia               | 130,07 | 17,42 | 0,00 | 0,00 |

|            |                        |        |       |      |        |
|------------|------------------------|--------|-------|------|--------|
| Huila      | Villavieja             | 91,51  | 10,92 | 0,00 | 0,00   |
| Huila      | Yaguará                | 167,01 | 36,56 | 0,00 | 0,00   |
| La Guajira | Urumita                | 56,15  | 1,66  | 1,26 | 0,00   |
| La Guajira | San Juan del Cesar     | 155,95 | 10,67 | 1,10 | 2,20   |
| La Guajira | Maicao                 | 73,55  | 6,00  | 0,72 | 0,65   |
| La Guajira | Barrancas              | 166,59 | 9,14  | 0,70 | 0,89   |
| La Guajira | Albania                | 37,34  | 6,89  | 0,42 | 3,11   |
| La Guajira | Dibulla                | 52,77  | 1,40  | 0,29 | 0,69   |
| La Guajira | Manaure                | 104,87 | 0,75  | 0,09 | 0,31   |
| La Guajira | Riohacha               | 81,34  | 5,89  | 0,05 | 0,33   |
| La Guajira | Distracción            | 22,39  | 5,26  | 0,00 | 0,65   |
| La Guajira | El Molino              | 158,96 | 6,15  | 0,00 | 2,51   |
| La Guajira | Fonseca                | 104,77 | 7,39  | 0,00 | 0,60   |
| La Guajira | Hatonuevo              | 20,14  | 0,42  | 0,00 | 0,42   |
| La Guajira | La Jagua del Pilar     | 54,76  | 3,28  | 0,00 | 0,00   |
| La Guajira | Uribia                 | 7,09   | 0,18  | 0,00 | 0,24   |
| La Guajira | Villanueva             | 279,51 | 5,57  | 0,00 | 0,00   |
| Magdalena  | Santa Bárbara de Pinto | 58,48  | 4,79  | 4,30 | 39,72  |
| Magdalena  | Pivijay                | 103,13 | 3,52  | 2,62 | 7,65   |
| Magdalena  | Tenerife               | 62,79  | 2,45  | 2,43 | 22,74  |
| Magdalena  | Zapayán                | 66,07  | 5,70  | 2,26 | 7,94   |
| Magdalena  | Plato                  | 60,78  | 4,23  | 2,22 | 19,40  |
| Magdalena  | Fundación              | 26,34  | 1,22  | 2,10 | 1,57   |
| Magdalena  | El Retén               | 82,08  | 0,94  | 1,46 | 0,95   |
| Magdalena  | Salamina               | 244,11 | 4,19  | 1,35 | 5,14   |
| Magdalena  | Pijiño del Carmen      | 75,40  | 5,10  | 1,34 | 27,61  |
| Magdalena  | Nueva Granada          | 13,71  | 0,49  | 1,05 | 11,51  |
| Magdalena  | Algarrobo              | 84,34  | 6,43  | 0,83 | 48,78  |
| Magdalena  | Guamal                 | 204,00 | 2,96  | 0,73 | 0,37   |
| Magdalena  | Zona Bananera          | 73,13  | 2,32  | 0,67 | 0,17   |
| Magdalena  | Sabanas de San Angel   | 58,29  | 3,56  | 0,65 | 37,44  |
| Magdalena  | Aracataca              | 25,76  | 1,78  | 0,53 | 0,79   |
| Magdalena  | Santa Marta            | 82,65  | 12,17 | 0,49 | 0,62   |
| Magdalena  | El Banco               | 56,15  | 3,25  | 0,36 | 1,81   |
| Magdalena  | Ariguani               | 45,50  | 3,76  | 0,31 | 16,25  |
| Magdalena  | Ciénaga                | 65,99  | 5,94  | 0,10 | 0,96   |
| Magdalena  | Cerro San Antonio      | 130,33 | 7,51  | 0,00 | 1,27   |
| Magdalena  | Chivolo                | 151,13 | 8,74  | 0,00 | 105,01 |
| Magdalena  | Concordia              | 169,97 | 4,25  | 0,00 | 1,05   |
| Magdalena  | El Piñon               | 166,32 | 7,76  | 0,00 | 15,52  |
| Magdalena  | Pedraza                | 53,27  | 6,20  | 0,00 | 1,24   |

|           |                             |        |       |       |       |
|-----------|-----------------------------|--------|-------|-------|-------|
| Magdalena | Puebloviejo                 | 93,34  | 7,26  | 0,00  | 0,00  |
| Magdalena | Remolino                    | 40,10  | 2,42  | 0,00  | 2,45  |
| Magdalena | San Sebastián de Buenavista | 48,04  | 5,15  | 0,00  | 2,87  |
| Magdalena | San Zenón                   | 189,35 | 4,40  | 0,00  | 0,00  |
| Magdalena | Santa Ana                   | 49,90  | 3,17  | 0,00  | 40,97 |
| Magdalena | Sitionuevo                  | 18,06  | 0,95  | 0,00  | 0,62  |
| Meta      | Fuente de Oro               | 170,00 | 29,29 | 13,68 | 3,23  |
| Meta      | San Juanito                 | 81,30  | 4,75  | 9,64  | 0,00  |
| Meta      | Barranca de Upía            | 159,14 | 41,70 | 8,28  | 13,80 |
| Meta      | Cabuyaro                    | 181,69 | 45,05 | 5,09  | 31,06 |
| Meta      | Castilla la Nueva           | 283,56 | 46,12 | 3,25  | 0,00  |
| Meta      | El Dorado                   | 257,41 | 26,41 | 2,93  | 2,94  |
| Meta      | Puerto Gaitán               | 123,19 | 17,43 | 2,69  | 2,73  |
| Meta      | San Carlos de Guaroa        | 176,01 | 23,82 | 2,21  | 2,61  |
| Meta      | Guamal                      | 82,98  | 25,81 | 2,15  | 3,26  |
| Meta      | Cubarral                    | 156,84 | 28,98 | 1,75  | 0,00  |
| Meta      | Cumaral                     | 195,42 | 34,09 | 1,68  | 3,34  |
| Meta      | El Castillo                 | 199,36 | 15,36 | 1,56  | 1,57  |
| Meta      | Puerto López                | 135,45 | 29,33 | 1,25  | 4,84  |
| Meta      | San Martín                  | 91,80  | 27,90 | 1,24  | 6,08  |
| Meta      | Villavicencio               | 137,03 | 29,03 | 1,02  | 1,26  |
| Meta      | Restrepo                    | 377,98 | 53,91 | 0,94  | 6,62  |
| Meta      | Granada                     | 57,92  | 18,48 | 0,70  | 0,18  |
| Meta      | Acacías                     | 152,37 | 32,79 | 0,62  | 1,41  |
| Meta      | Puerto Concordia            | 27,75  | 7,59  | 0,49  | 5,61  |
| Meta      | Vistahermosa                | 60,75  | 10,01 | 0,45  | 1,58  |
| Meta      | El Calvario                 | 44,20  | 4,43  | 0,00  | 0,00  |
| Meta      | La Macarena                 | 34,89  | 5,88  | 0,00  | 2,26  |
| Meta      | Lejanías                    | 134,89 | 13,80 | 0,00  | 1,06  |
| Meta      | Mapiripán                   | 23,44  | 3,68  | 0,00  | 8,03  |
| Meta      | Mesetas                     | 83,89  | 9,75  | 0,00  | 0,00  |
| Meta      | Puerto Lleras               | 83,60  | 10,04 | 0,00  | 32,46 |
| Meta      | Puerto Rico                 | 56,45  | 6,04  | 0,00  | 0,00  |
| Meta      | San Juan de Arama           | 153,08 | 11,24 | 0,00  | 36,50 |
| Meta      | Uribe                       | 17,99  | 0,00  | 0,00  | 0,00  |
| Nariño    | Barbacoas                   | 39,16  | 3,55  | 34,94 | 83,70 |
| Nariño    | Nariño                      | 75,67  | 12,39 | 2,05  | 0,00  |
| Nariño    | Contadero                   | 187,91 | 13,02 | 1,49  | 1,43  |
| Nariño    | Olaya Herrera               | 63,08  | 1,61  | 1,28  | 0,00  |
| Nariño    | La Cruz                     | 94,39  | 7,71  | 1,11  | 0,00  |
| Nariño    | Yacuanquer                  | 179,19 | 12,95 | 0,97  | 1,83  |

|        |                      |        |       |      |       |
|--------|----------------------|--------|-------|------|-------|
| Nariño | Cumbal               | 74,10  | 2,75  | 0,93 | 1,09  |
| Nariño | Magüi                | 11,89  | 0,52  | 0,92 | 4,20  |
| Nariño | Ipiiales             | 141,33 | 6,07  | 0,34 | 0,23  |
| Nariño | El Charco            | 27,88  | 1,42  | 0,26 | 0,00  |
| Nariño | Túquerres            | 94,91  | 7,37  | 0,25 | 0,98  |
| Nariño | San Andres de Tumaco | 38,09  | 1,74  | 0,10 | 0,16  |
| Nariño | Pasto                | 181,58 | 10,41 | 0,10 | 0,63  |
| Nariño | Alban                | 73,57  | 1,93  | 0,00 | 0,00  |
| Nariño | Aldana               | 229,66 | 11,09 | 0,00 | 1,58  |
| Nariño | Ancuyá               | 221,03 | 24,71 | 0,00 | 0,00  |
| Nariño | Arboleda             | 201,84 | 3,99  | 0,00 | 0,00  |
| Nariño | Belén                | 65,09  | 8,10  | 0,00 | 0,00  |
| Nariño | Buesaco              | 151,62 | 9,77  | 0,00 | 0,42  |
| Nariño | Chachagüí            | 172,79 | 13,07 | 0,00 | 0,00  |
| Nariño | Colón                | 157,40 | 1,02  | 0,00 | 11,15 |
| Nariño | Consaca              | 234,28 | 16,83 | 0,00 | 1,05  |
| Nariño | Córdoba              | 125,34 | 3,58  | 0,00 | 0,72  |
| Nariño | Cuaspud              | 101,23 | 8,18  | 0,00 | 0,00  |
| Nariño | Cumbitara            | 44,01  | 0,70  | 0,00 | 0,00  |
| Nariño | El Peñol             | 166,33 | 7,72  | 0,00 | 1,48  |
| Nariño | El Rosario           | 36,58  | 1,93  | 0,00 | 0,00  |
| Nariño | El Tablón de Gómez   | 81,23  | 4,69  | 0,00 | 1,51  |
| Nariño | El Tambo             | 194,20 | 11,79 | 0,00 | 0,00  |
| Nariño | Francisco Pizarro    | 20,94  | 0,00  | 0,00 | 0,00  |
| Nariño | Funes                | 201,11 | 12,19 | 0,00 | 4,62  |
| Nariño | Guachucal            | 204,18 | 10,16 | 0,00 | 0,00  |
| Nariño | Guaitarilla          | 99,13  | 6,53  | 0,00 | 0,00  |
| Nariño | Gualmatán            | 93,88  | 5,22  | 0,00 | 0,00  |
| Nariño | Iles                 | 34,19  | 2,32  | 0,00 | 1,15  |
| Nariño | Imués                | 132,64 | 3,21  | 0,00 | 0,00  |
| Nariño | La Florida           | 74,27  | 3,15  | 0,00 | 0,00  |
| Nariño | La Llanada           | 159,83 | 5,19  | 0,00 | 0,00  |
| Nariño | La Tola              | 52,84  | 1,10  | 0,00 | 0,00  |
| Nariño | La Unión             | 74,01  | 14,48 | 0,00 | 7,61  |
| Nariño | Leiva                | 20,75  | 0,00  | 0,00 | 0,72  |
| Nariño | Linares              | 139,25 | 21,43 | 0,00 | 1,92  |
| Nariño | Los Andes            | 94,13  | 4,17  | 0,00 | 17,51 |
| Nariño | Mallama              | 109,26 | 8,94  | 0,00 | 1,18  |
| Nariño | Mosquera             | 30,66  | 1,27  | 0,00 | 0,00  |
| Nariño | Ospina               | 140,62 | 4,60  | 0,00 | 9,23  |
| Nariño | Policarpa            | 47,25  | 3,02  | 0,00 | 0,00  |

|                    |                      |        |       |      |        |
|--------------------|----------------------|--------|-------|------|--------|
| Nariño             | Potosí               | 121,98 | 6,48  | 0,00 | 0,00   |
| Nariño             | Providencia          | 137,31 | 3,76  | 0,00 | 0,00   |
| Nariño             | Puerres              | 107,14 | 4,69  | 0,00 | 1,17   |
| Nariño             | Pupiales             | 76,82  | 3,12  | 0,00 | 0,52   |
| Nariño             | Ricaurte             | 64,48  | 4,35  | 0,00 | 1,05   |
| Nariño             | Roberto Payán        | 0,92   | 0,00  | 0,00 | 0,51   |
| Nariño             | Samaniego            | 90,77  | 3,82  | 0,00 | 0,00   |
| Nariño             | San Bernardo         | 78,64  | 1,69  | 0,00 | 1,04   |
| Nariño             | San Lorenzo          | 86,84  | 5,14  | 0,00 | 6,59   |
| Nariño             | San Pablo            | 70,33  | 5,11  | 0,00 | 0,56   |
| Nariño             | San Pedro de Cartago | 174,52 | 6,70  | 0,00 | 0,00   |
| Nariño             | Sandoná              | 204,51 | 9,77  | 0,00 | 2,34   |
| Nariño             | Santa Bárbara        | 8,73   | 0,67  | 0,00 | 0,66   |
| Nariño             | Santacruz            | 18,45  | 0,00  | 0,00 | 0,34   |
| Nariño             | Sapuyes              | 109,82 | 6,22  | 0,00 | 1,60   |
| Nariño             | Taminango            | 112,86 | 6,96  | 0,00 | 0,00   |
| Nariño             | Tangua               | 89,41  | 8,30  | 0,00 | 0,00   |
| Norte de Santander | Bochalema            | 192,04 | 28,86 | 2,95 | 0,00   |
| Norte de Santander | San Cayetano         | 167,57 | 14,92 | 1,95 | 0,00   |
| Norte de Santander | Villa Caro           | 57,96  | 19,24 | 1,95 | 5,80   |
| Norte de Santander | Pamplona             | 209,81 | 17,43 | 1,30 | 0,36   |
| Norte de Santander | Toledo               | 128,47 | 16,20 | 1,16 | 100,11 |
| Norte de Santander | Los Patios           | 240,55 | 39,74 | 1,14 | 0,42   |
| Norte de Santander | El Zulia             | 153,67 | 17,48 | 0,91 | 1,35   |
| Norte de Santander | Tibú                 | 101,15 | 11,02 | 0,85 | 7,98   |
| Norte de Santander | Cúcuta               | 155,67 | 25,01 | 0,78 | 0,40   |
| Norte de Santander | Chinácota            | 228,21 | 22,58 | 0,66 | 0,61   |
| Norte de Santander | El Carmen            | 120,31 | 19,39 | 0,63 | 4,15   |
| Norte de Santander | Ocaña                | 138,84 | 16,04 | 0,52 | 1,78   |
| Norte de Santander | Sardinata            | 75,91  | 8,38  | 0,44 | 9,71   |
| Norte de Santander | Villa del Rosario    | 199,56 | 31,57 | 0,27 | 0,34   |
| Norte de Santander | Abrego               | 67,78  | 5,10  | 0,00 | 0,00   |
| Norte de Santander | Arboledas            | 104,14 | 4,44  | 0,00 | 31,16  |
| Norte de Santander | Bucarasica           | 89,79  | 0,00  | 0,00 | 0,00   |
| Norte de Santander | Cachirá              | 78,77  | 3,65  | 0,00 | 0,00   |
| Norte de Santander | Cácuta               | 285,78 | 9,78  | 0,00 | 5,34   |
| Norte de Santander | Chitagá              | 58,96  | 4,81  | 0,00 | 29,84  |
| Norte de Santander | Convención           | 205,32 | 16,78 | 0,00 | 0,74   |
| Norte de Santander | Cucutilla            | 131,30 | 6,38  | 0,00 | 2,55   |
| Norte de Santander | Durania              | 269,74 | 25,70 | 0,00 | 15,38  |
| Norte de Santander | El Tarra             | 101,57 | 2,74  | 0,00 | 8,25   |

|                    |                   |        |       |      |       |
|--------------------|-------------------|--------|-------|------|-------|
| Norte de Santander | Gramalote         | 44,15  | 3,59  | 0,00 | 1,67  |
| Norte de Santander | Hacarí            | 85,96  | 1,94  | 0,00 | 0,00  |
| Norte de Santander | Herrán            | 57,62  | 2,50  | 0,00 | 0,00  |
| Norte de Santander | La Esperanza      | 61,30  | 6,72  | 0,00 | 10,94 |
| Norte de Santander | La Playa          | 97,47  | 7,04  | 0,00 | 1,17  |
| Norte de Santander | Labateca          | 140,13 | 8,55  | 0,00 | 18,73 |
| Norte de Santander | Lourdes           | 80,00  | 2,96  | 0,00 | 2,95  |
| Norte de Santander | Mutiscua          | 58,07  | 2,67  | 0,00 | 2,60  |
| Norte de Santander | Pamplonita        | 108,03 | 12,19 | 0,00 | 0,00  |
| Norte de Santander | Puerto Santander  | 74,98  | 6,15  | 0,00 | 0,00  |
| Norte de Santander | Ragonvalia        | 61,03  | 10,18 | 0,00 | 14,50 |
| Norte de Santander | Salazar           | 175,97 | 19,93 | 0,00 | 1,12  |
| Norte de Santander | San Calixto       | 39,21  | 2,26  | 0,00 | 13,79 |
| Norte de Santander | Santiago          | 135,66 | 10,71 | 0,00 | 25,58 |
| Norte de Santander | Silos             | 81,48  | 4,58  | 0,00 | 0,00  |
| Norte de Santander | Teorama           | 33,53  | 3,37  | 0,00 | 4,00  |
| Putumayo           | Leguízamo         | 201,92 | 27,71 | 3,20 | 1,27  |
| Putumayo           | Villagarzón       | 177,98 | 11,41 | 2,38 | 0,96  |
| Putumayo           | Mocoa             | 323,74 | 18,60 | 1,71 | 3,08  |
| Putumayo           | Puerto Asís       | 133,21 | 13,42 | 0,86 | 1,19  |
| Putumayo           | San Miguel        | 157,66 | 3,50  | 0,82 | 1,93  |
| Putumayo           | Valle del Guamuez | 98,99  | 8,78  | 0,81 | 4,49  |
| Putumayo           | Sibundoy          | 134,70 | 4,98  | 0,74 | 0,00  |
| Putumayo           | Puerto Caicedo    | 125,97 | 7,63  | 0,69 | 12,35 |
| Putumayo           | Orito             | 152,80 | 9,85  | 0,61 | 9,53  |
| Putumayo           | Colón             | 100,61 | 14,65 | 0,00 | 0,00  |
| Putumayo           | Puerto Guzmán     | 29,89  | 1,73  | 0,00 | 0,00  |
| Putumayo           | San Francisco     | 61,39  | 1,40  | 0,00 | 0,00  |
| Putumayo           | Santiago          | 87,16  | 3,94  | 0,00 | 0,00  |
| Quindío            | Montenegro        | 239,00 | 39,17 | 1,46 | 0,98  |
| Quindío            | Armenia           | 211,13 | 29,19 | 1,05 | 0,48  |
| Quindío            | Quimbaya          | 253,27 | 41,64 | 0,86 | 0,29  |
| Quindío            | Circasia          | 316,59 | 40,29 | 0,34 | 2,36  |
| Quindío            | Calarca           | 221,99 | 37,06 | 0,13 | 0,65  |
| Quindío            | Buenavista        | 73,64  | 52,64 | 0,00 | 0,00  |
| Quindío            | Córdoba           | 33,46  | 24,49 | 0,00 | 0,00  |
| Quindío            | Filandia          | 269,95 | 37,44 | 0,00 | 0,76  |
| Quindío            | Génova            | 234,78 | 30,83 | 0,00 | 0,00  |
| Quindío            | La Tebaida        | 203,31 | 27,37 | 0,00 | 1,57  |
| Quindío            | Pijao             | 313,62 | 46,72 | 0,00 | 0,00  |
| Quindío            | Salento           | 213,17 | 18,24 | 0,00 | 0,00  |

|           |                        |        |       |      |      |
|-----------|------------------------|--------|-------|------|------|
| Risaralda | Marsella               | 222,29 | 34,40 | 2,20 | 1,78 |
| Risaralda | Belén de Umbría        | 242,76 | 34,63 | 1,44 | 0,36 |
| Risaralda | Santuario              | 203,64 | 38,30 | 1,29 | 0,64 |
| Risaralda | Pereira                | 189,81 | 27,01 | 0,98 | 0,44 |
| Risaralda | Pueblo Rico            | 90,08  | 7,72  | 0,76 | 0,00 |
| Risaralda | Santa Rosa de Cabal    | 164,17 | 22,39 | 0,70 | 0,56 |
| Risaralda | La Virginia            | 276,02 | 36,95 | 0,63 | 0,32 |
| Risaralda | Dosquebradas           | 157,49 | 24,78 | 0,63 | 0,16 |
| Risaralda | Apía                   | 179,26 | 21,44 | 0,00 | 0,54 |
| Risaralda | Balboa                 | 134,24 | 28,43 | 0,00 | 1,58 |
| Risaralda | Guática                | 230,05 | 22,70 | 0,00 | 0,00 |
| Risaralda | La Celia               | 143,59 | 22,03 | 0,00 | 0,00 |
| Risaralda | Mistrató               | 61,33  | 7,60  | 0,00 | 0,00 |
| Risaralda | Quinchía               | 181,01 | 15,42 | 0,00 | 1,18 |
| Santander | Valle de San José      | 244,19 | 24,67 | 8,39 | 2,09 |
| Santander | Sabana de Torres       | 281,39 | 35,54 | 7,77 | 4,23 |
| Santander | Albania                | 31,87  | 3,87  | 5,89 | 0,00 |
| Santander | Hato                   | 203,71 | 21,25 | 4,21 | 0,00 |
| Santander | Palmas del Socorro     | 271,32 | 35,23 | 4,20 | 4,49 |
| Santander | San Joaquín            | 279,35 | 0,00  | 3,71 | 0,00 |
| Santander | Jesús María            | 142,06 | 28,57 | 3,19 | 3,19 |
| Santander | Barrancabermeja        | 166,03 | 39,90 | 2,97 | 1,93 |
| Santander | Tona                   | 70,28  | 5,73  | 2,88 | 1,47 |
| Santander | Contratación           | 183,74 | 11,20 | 2,57 | 0,00 |
| Santander | Páramo                 | 211,62 | 12,24 | 2,41 | 0,00 |
| Santander | Güepsa                 | 392,46 | 33,95 | 2,40 | 0,00 |
| Santander | Puerto Wilches         | 94,27  | 13,33 | 1,59 | 0,95 |
| Santander | Lebríja                | 224,33 | 27,91 | 1,51 | 2,29 |
| Santander | Bucaramanga            | 120,33 | 24,09 | 1,39 | 1,09 |
| Santander | San Gil                | 206,61 | 24,79 | 1,34 | 0,23 |
| Santander | Barichara              | 247,95 | 48,11 | 1,32 | 0,00 |
| Santander | Piedecuesta            | 117,39 | 19,74 | 1,25 | 0,92 |
| Santander | Sucre                  | 64,30  | 3,53  | 1,19 | 0,00 |
| Santander | San Vicente de Chucurí | 106,15 | 18,59 | 1,16 | 1,17 |
| Santander | Rionegro               | 152,13 | 15,34 | 1,07 | 4,98 |
| Santander | Floridablanca          | 113,58 | 22,32 | 1,06 | 1,23 |
| Santander | Cimitarra              | 120,28 | 17,36 | 1,00 | 1,28 |
| Santander | Mogotes                | 193,61 | 26,62 | 0,91 | 0,00 |
| Santander | El Playón              | 146,53 | 17,53 | 0,86 | 3,32 |
| Santander | Los Santos             | 113,95 | 17,63 | 0,84 | 0,83 |
| Santander | Girón                  | 91,42  | 19,63 | 0,74 | 0,31 |

|           |                      |        |        |      |       |
|-----------|----------------------|--------|--------|------|-------|
| Santander | Barbosa              | 165,09 | 30,75  | 0,73 | 1,83  |
| Santander | Málaga               | 245,15 | 34,70  | 0,54 | 1,63  |
| Santander | Vélez                | 164,03 | 9,40   | 0,51 | 1,04  |
| Santander | Socorro              | 204,28 | 31,02  | 0,34 | 0,00  |
| Santander | Aguada               | 100,90 | 5,19   | 0,00 | 5,39  |
| Santander | Aratocha             | 159,79 | 16,83  | 0,00 | 1,20  |
| Santander | Betulia              | 123,23 | 15,46  | 0,00 | 13,58 |
| Santander | Bolívar              | 202,32 | 6,33   | 0,00 | 0,00  |
| Santander | Cabrera              | 286,38 | 8,81   | 0,00 | 0,00  |
| Santander | California           | 188,64 | 5,11   | 0,00 | 0,00  |
| Santander | Capitanejo           | 227,33 | 40,93  | 0,00 | 0,00  |
| Santander | Carcasí              | 120,11 | 9,77   | 0,00 | 0,00  |
| Santander | Cepitá               | 84,08  | 26,73  | 0,00 | 0,00  |
| Santander | Cerrito              | 186,56 | 34,46  | 0,00 | 0,00  |
| Santander | Charalá              | 106,51 | 11,28  | 0,00 | 0,92  |
| Santander | Charta               | 144,97 | 14,83  | 0,00 | 0,00  |
| Santander | Chima                | 114,56 | 12,84  | 0,00 | 0,00  |
| Santander | Chipatá              | 133,31 | 0,00   | 0,00 | 0,00  |
| Santander | Concepción           | 174,89 | 24,16  | 0,00 | 77,53 |
| Santander | Confines             | 177,21 | 11,09  | 0,00 | 0,00  |
| Santander | Coromoro             | 59,74  | 3,99   | 0,00 | 0,00  |
| Santander | Curití               | 204,37 | 29,48  | 0,00 | 0,00  |
| Santander | El Carmen de Chucurí | 68,27  | 3,61   | 0,00 | 1,52  |
| Santander | El Guacamayo         | 152,19 | 4,92   | 0,00 | 0,00  |
| Santander | El Peñón             | 90,37  | 5,69   | 0,00 | 0,00  |
| Santander | Encino               | 23,78  | 3,97   | 0,00 | 0,00  |
| Santander | Enciso               | 321,37 | 141,24 | 0,00 | 3,01  |
| Santander | Florián              | 123,16 | 9,48   | 0,00 | 0,00  |
| Santander | Galán                | 109,12 | 8,45   | 0,00 | 4,33  |
| Santander | Gambita              | 73,20  | 7,91   | 0,00 | 1,97  |
| Santander | Guaca                | 97,17  | 3,07   | 0,00 | 0,00  |
| Santander | Guadalupe            | 129,72 | 29,09  | 0,00 | 2,07  |
| Santander | Guapotá              | 202,61 | 27,73  | 0,00 | 4,72  |
| Santander | Guavatá              | 177,52 | 12,91  | 0,00 | 0,00  |
| Santander | Jordán               | 8,90   | 9,10   | 0,00 | 0,00  |
| Santander | La Belleza           | 105,14 | 8,18   | 0,00 | 0,00  |
| Santander | La Paz               | 59,69  | 3,82   | 0,00 | 5,84  |
| Santander | Landázuri            | 111,39 | 7,82   | 0,00 | 0,65  |
| Santander | Macaravita           | 103,25 | 11,99  | 0,00 | 0,00  |
| Santander | Matanza              | 249,81 | 20,29  | 0,00 | 0,00  |
| Santander | Molagavita           | 106,48 | 1,87   | 0,00 | 0,00  |



|           |                       |        |       |       |       |
|-----------|-----------------------|--------|-------|-------|-------|
| Santander | Ocamonte              | 193,82 | 12,54 | 0,00  | 0,00  |
| Santander | Oiba                  | 228,00 | 32,79 | 0,00  | 0,00  |
| Santander | Onzaga                | 96,09  | 11,77 | 0,00  | 0,00  |
| Santander | Palmar                | 33,38  | 0,00  | 0,00  | 0,00  |
| Santander | Pinchote              | 168,87 | 16,21 | 0,00  | 1,89  |
| Santander | Puente Nacional       | 122,21 | 16,56 | 0,00  | 0,00  |
| Santander | Puerto Parra          | 45,30  | 6,87  | 0,00  | 1,43  |
| Santander | San Andrés            | 166,81 | 11,22 | 0,00  | 1,05  |
| Santander | San Benito            | 52,94  | 10,10 | 0,00  | 2,53  |
| Santander | San José de Miranda   | 171,87 | 29,50 | 0,00  | 2,21  |
| Santander | San Miguel            | 113,73 | 24,79 | 0,00  | 4,20  |
| Santander | Santa Bárbara         | 216,70 | 46,37 | 0,00  | 0,00  |
| Santander | Santa Helena del Opón | 22,83  | 2,30  | 0,00  | 0,00  |
| Santander | Simacota              | 178,06 | 19,91 | 0,00  | 1,25  |
| Santander | Suaita                | 112,79 | 29,94 | 0,00  | 1,91  |
| Santander | Suratá                | 83,51  | 14,77 | 0,00  | 0,00  |
| Santander | Vetas                 | 29,15  | 4,17  | 0,00  | 0,00  |
| Santander | Villanueva            | 121,13 | 51,87 | 0,00  | 1,59  |
| Santander | Zapatoca              | 110,05 | 20,04 | 0,00  | 0,00  |
| Sucre     | Coloso                | 191,68 | 16,83 | 15,39 | 41,63 |
| Sucre     | Tolú Viejo            | 205,22 | 3,70  | 3,17  | 39,14 |
| Sucre     | Coveñas               | 338,09 | 23,50 | 3,17  | 4,57  |
| Sucre     | Ovejas                | 100,01 | 9,45  | 2,35  | 20,21 |
| Sucre     | Palmito               | 101,17 | 4,56  | 2,29  | 10,92 |
| Sucre     | El Roble              | 96,09  | 8,64  | 2,05  | 2,94  |
| Sucre     | Morroa                | 236,31 | 22,72 | 1,45  | 7,08  |
| Sucre     | San Pedro             | 246,11 | 6,19  | 1,25  | 4,33  |
| Sucre     | San Marcos            | 147,46 | 13,85 | 1,15  | 1,82  |
| Sucre     | Buenavista            | 215,20 | 4,21  | 1,04  | 4,23  |
| Sucre     | Sincelejo             | 167,32 | 14,40 | 1,04  | 2,45  |
| Sucre     | Caimito               | 92,64  | 4,26  | 0,83  | 1,70  |
| Sucre     | Corozal               | 105,92 | 9,07  | 0,82  | 0,81  |
| Sucre     | Majagual              | 63,86  | 3,36  | 0,62  | 1,52  |
| Sucre     | Santiago de Tolú      | 201,57 | 13,99 | 0,61  | 6,67  |
| Sucre     | Galeras               | 139,51 | 7,08  | 0,51  | 2,04  |
| Sucre     | San Luis de Sincé     | 60,64  | 3,96  | 0,30  | 1,54  |
| Sucre     | Sampués               | 191,92 | 7,65  | 0,26  | 5,55  |
| Sucre     | San Onofre            | 94,10  | 3,63  | 0,21  | 13,45 |
| Sucre     | Chalán                | 150,51 | 6,91  | 0,00  | 23,10 |
| Sucre     | Guaranda              | 62,58  | 1,75  | 0,00  | 0,00  |
| Sucre     | La Unión              | 289,38 | 3,63  | 0,00  | 1,78  |

|        |                     |        |       |      |       |
|--------|---------------------|--------|-------|------|-------|
| Sucre  | Los Palmitos        | 43,61  | 2,60  | 0,00 | 3,63  |
| Sucre  | San Benito Abad     | 43,57  | 1,20  | 0,00 | 0,40  |
| Sucre  | San Juan de Betulia | 124,55 | 4,00  | 0,00 | 0,00  |
| Sucre  | Sucre               | 269,78 | 2,23  | 0,00 | 0,00  |
| Tolima | Ambalema            | 313,08 | 78,37 | 4,26 | 1,38  |
| Tolima | Armero              | 374,32 | 64,93 | 4,05 | 0,79  |
| Tolima | Valle de San Juan   | 166,08 | 11,06 | 3,16 | 0,00  |
| Tolima | Saldaña             | 312,02 | 32,21 | 2,69 | 2,06  |
| Tolima | Carmen de Apicalá   | 498,83 | 62,02 | 2,29 | 0,00  |
| Tolima | Suárez              | 218,10 | 19,80 | 2,20 | 0,00  |
| Tolima | Piedras             | 132,33 | 14,33 | 1,77 | 1,79  |
| Tolima | Natagaima           | 177,10 | 14,07 | 1,75 | 1,32  |
| Tolima | Honda               | 186,98 | 41,20 | 1,56 | 0,75  |
| Tolima | Venadillo           | 124,23 | 12,88 | 1,54 | 0,00  |
| Tolima | Melgar              | 384,65 | 75,50 | 1,40 | 1,12  |
| Tolima | Purificación        | 241,86 | 23,44 | 1,39 | 1,75  |
| Tolima | Flandes             | 227,21 | 44,21 | 1,38 | 0,00  |
| Tolima | Prado               | 251,31 | 20,44 | 1,28 | 20,51 |
| Tolima | Alvarado            | 223,47 | 33,84 | 1,12 | 2,26  |
| Tolima | Falan               | 115,96 | 16,26 | 1,08 | 0,00  |
| Tolima | Chaparral           | 177,88 | 14,66 | 1,06 | 3,19  |
| Tolima | Coello              | 166,10 | 18,81 | 1,04 | 3,08  |
| Tolima | Fresno              | 208,01 | 31,17 | 0,97 | 0,33  |
| Tolima | Villahermosa        | 126,62 | 14,76 | 0,94 | 0,00  |
| Tolima | Ibagué              | 144,62 | 19,01 | 0,92 | 0,74  |
| Tolima | Rioblanco           | 86,25  | 3,64  | 0,81 | 0,00  |
| Tolima | Espinal             | 303,12 | 43,52 | 0,79 | 0,66  |
| Tolima | Guamo               | 267,70 | 25,88 | 0,60 | 1,51  |
| Tolima | Mariquita           | 287,27 | 58,05 | 0,60 | 4,51  |
| Tolima | San Luis            | 59,26  | 25,54 | 0,52 | 1,56  |
| Tolima | Cajamarca           | 193,05 | 18,80 | 0,51 | 0,51  |
| Tolima | Planadas            | 184,80 | 15,44 | 0,34 | 1,01  |
| Tolima | Ortega              | 129,97 | 6,11  | 0,31 | 1,22  |
| Tolima | Líbano              | 166,34 | 13,22 | 0,25 | 0,49  |
| Tolima | Alpujarra           | 138,76 | 13,91 | 0,00 | 3,97  |
| Tolima | Anzoátegui          | 86,59  | 12,38 | 0,00 | 0,00  |
| Tolima | Ataco               | 63,92  | 3,57  | 0,00 | 0,90  |
| Tolima | Casabianca          | 115,98 | 16,36 | 0,00 | 1,50  |
| Tolima | Coyaima             | 93,91  | 5,31  | 0,00 | 0,71  |
| Tolima | Cunday              | 76,12  | 13,03 | 0,00 | 0,98  |
| Tolima | Dolores             | 164,23 | 18,17 | 0,00 | 1,25  |

|                 |                     |        |        |      |      |
|-----------------|---------------------|--------|--------|------|------|
| Tolima          | Herveo              | 115,01 | 10,86  | 0,00 | 1,23 |
| Tolima          | Icononzo            | 153,17 | 21,68  | 0,00 | 0,00 |
| Tolima          | Lérida              | 305,49 | 37,17  | 0,00 | 0,57 |
| Tolima          | Murillo             | 67,19  | 1,98   | 0,00 | 0,00 |
| Tolima          | Palocabildo         | 163,81 | 10,78  | 0,00 | 1,08 |
| Tolima          | Roncesvalles        | 55,34  | 9,50   | 0,00 | 1,58 |
| Tolima          | Rovira              | 208,99 | 27,43  | 0,00 | 0,96 |
| Tolima          | San Antonio         | 178,82 | 20,51  | 0,00 | 0,00 |
| Tolima          | Santa Isabel        | 32,61  | 0,00   | 0,00 | 0,00 |
| Tolima          | Villarrica          | 111,50 | 9,03   | 0,00 | 0,00 |
| Valle del Cauca | Yotoco              | 208,14 | 34,69  | 3,09 | 1,86 |
| Valle del Cauca | Ginebra             | 211,70 | 50,77  | 2,91 | 0,50 |
| Valle del Cauca | Roldanillo          | 301,41 | 105,63 | 2,68 | 1,78 |
| Valle del Cauca | La Cumbre           | 501,46 | 43,79  | 2,65 | 2,63 |
| Valle del Cauca | Alcalá              | 309,25 | 46,21  | 2,55 | 0,49 |
| Valle del Cauca | Bolívar             | 122,33 | 42,51  | 2,14 | 2,85 |
| Valle del Cauca | Ansermanuevo        | 227,26 | 42,84  | 1,99 | 2,54 |
| Valle del Cauca | La Unión            | 174,82 | 43,04  | 1,97 | 1,37 |
| Valle del Cauca | Bugalagrande        | 266,22 | 40,98  | 1,41 | 1,40 |
| Valle del Cauca | Candelaria          | 108,27 | 15,90  | 1,35 | 0,52 |
| Valle del Cauca | Jamundí             | 238,69 | 34,57  | 1,34 | 1,79 |
| Valle del Cauca | Cartago             | 188,07 | 41,50  | 1,32 | 1,40 |
| Valle del Cauca | Calima              | 342,21 | 55,41  | 1,28 | 1,28 |
| Valle del Cauca | Toro                | 146,04 | 37,46  | 1,25 | 1,25 |
| Valle del Cauca | Guacarí             | 196,55 | 28,15  | 1,20 | 0,87 |
| Valle del Cauca | Guadalajara de Buga | 181,03 | 31,66  | 1,12 | 1,04 |
| Valle del Cauca | Dagua               | 386,39 | 42,38  | 1,11 | 1,37 |
| Valle del Cauca | Trujillo            | 176,56 | 38,44  | 1,09 | 7,67 |
| Valle del Cauca | El Águila           | 148,17 | 25,51  | 0,92 | 0,92 |
| Valle del Cauca | Zarzal              | 213,55 | 48,63  | 0,92 | 1,11 |
| Valle del Cauca | Sevilla             | 211,40 | 30,72  | 0,86 | 0,22 |
| Valle del Cauca | La Victoria         | 209,74 | 29,62  | 0,74 | 5,95 |
| Valle del Cauca | Buenaventura        | 17,23  | 1,60   | 0,72 | 0,70 |
| Valle del Cauca | Obando              | 286,77 | 67,63  | 0,66 | 3,36 |
| Valle del Cauca | Palmira             | 178,27 | 23,53  | 0,60 | 0,54 |
| Valle del Cauca | Andalucía           | 264,95 | 34,69  | 0,56 | 1,67 |
| Valle del Cauca | Tuluá               | 103,21 | 22,59  | 0,56 | 0,60 |
| Valle del Cauca | San Pedro           | 49,85  | 27,12  | 0,55 | 0,00 |
| Valle del Cauca | Cali                | 119,72 | 21,18  | 0,55 | 0,47 |
| Valle del Cauca | Yumbo               | 272,61 | 41,32  | 0,55 | 1,40 |
| Valle del Cauca | El Cerrito          | 114,55 | 11,74  | 0,52 | 0,53 |

|                 |                |        |       |         |        |
|-----------------|----------------|--------|-------|---------|--------|
| Valle del Cauca | Caicedonia     | 379,11 | 49,18 | 0,34    | 2,32   |
| Valle del Cauca | Pradera        | 313,40 | 32,89 | 0,19    | 1,51   |
| Valle del Cauca | Argelia        | 102,82 | 32,31 | 0,00    | 3,02   |
| Valle del Cauca | El Cairo       | 183,12 | 19,37 | 0,00    | 0,00   |
| Valle del Cauca | El Dovio       | 219,35 | 44,69 | 0,00    | 4,43   |
| Valle del Cauca | Florida        | 225,35 | 23,59 | 0,00    | 6,32   |
| Valle del Cauca | Restrepo       | 340,89 | 34,70 | 0,00    | 0,00   |
| Valle del Cauca | Riofrío        | 265,20 | 47,56 | 0,00    | 0,63   |
| Valle del Cauca | Ulloa          | 393,94 | 39,96 | 0,00    | 10,70  |
| Valle del Cauca | Versalles      | 236,28 | 44,35 | 0,00    | 0,00   |
| Valle del Cauca | Vijes          | 194,76 | 31,31 | 0,00    | 0,00   |
| Vaupés          | Taraira        | 336,93 | 0,00  | 1100,55 | 0,00   |
| Vaupés          | Yavaraté       | 32,03  | 0,00  | 391,17  | 39,67  |
| Vaupés          | Pacoa          | 22,60  | 0,00  | 201,16  | 142,84 |
| Vaupés          | Mitú           | 99,10  | 5,46  | 39,46   | 5,68   |
| Vaupés          | Papunahua      | 81,73  | 0,00  | 11,61   | 0,00   |
| Vaupés          | Caruru         | 15,06  | 6,02  | 0,00    | 0,00   |
| Vichada         | Puerto Carreño | 288,76 | 43,08 | 5,71    | 26,45  |
| Vichada         | La Primavera   | 94,33  | 9,54  | 3,12    | 11,50  |
| Vichada         | Santa Rosalía  | 131,09 | 22,70 | 2,63    | 4,99   |
| Vichada         | Cumaribo       | 15,43  | 1,45  | 0,55    | 1,43   |
