# Supplementary material for: Epidemiological scenarios for human rabies exposure notified in Colombia during ten years: A challenge to implement surveillance actions with a differential approach on vulnerable populations
Source: PubMed Central journal article supplement (PMC6934280; doi:10.1371/journal.pone.0213120), 2019-12-27
Supplement: pone.0213120.s003.pdf [file pone.0213120.s003.pdf]

## Spatial Autocorrelation Report-Incidence HRE due Dog

**Moran's Index:** 0,108848

**z-score:** 58,451458

**p-value:** 0,000000

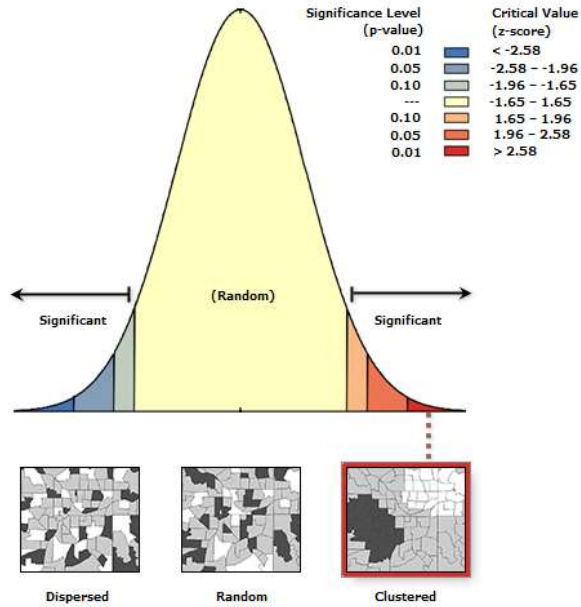

Given the z-score of 69.3591419716, there is a less than 1% likelihood that this clustered pattern could be the result of random chance.

### Global Moran's I Summary

|                        |           |
|------------------------|-----------|
| <b>Moran's Index:</b>  | 0,108848  |
| <b>Expected Index:</b> | -0,000892 |
| <b>Variance:</b>       | 0,000004  |
| <b>z-score:</b>        | 58,451458 |
| <b>p-value:</b>        | 0,000000  |

**Input Feature Class:** Colombia\_Incidences\_Cities

### Dataset Information

|                             |                    |
|-----------------------------|--------------------|
| <b>Input Field:</b>         | DOG_INCIDENCE      |
| <b>Conceptualization:</b>   | INVERSE_DISTANCE   |
| <b>Distance Method:</b>     | EUCLIDEAN          |
| <b>Row Standardization:</b> | False              |
| <b>Distance Threshold:</b>  | 681461,0293 Meters |
| <b>Weights Matrix File:</b> | None               |
| <b>Selection Set:</b>       | False              |

## Spatial Autocorrelation Report-Incidence HRE due Cat

**Moran's Index:** 0,128900  
**z-score:** 69,359142 █  
**p-value:** 0,000000

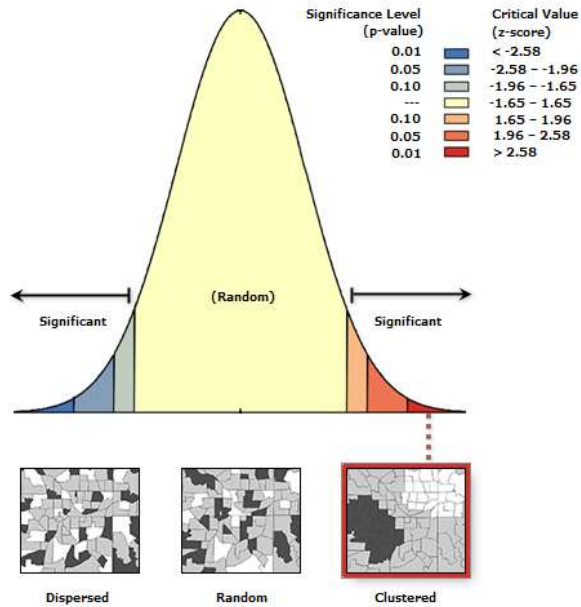

Given the z-score of 69.3591419716, there is a less than 1% likelihood that this clustered pattern could be the result of random chance.

### Global Moran's I Summary

|                        |           |
|------------------------|-----------|
| <b>Moran's Index:</b>  | 0,128900  |
| <b>Expected Index:</b> | -0,000892 |
| <b>Variance:</b>       | 0,000004  |
| <b>z-score:</b>        | 69,359142 |
| <b>p-value:</b>        | 0,000000  |

|                             |                            |
|-----------------------------|----------------------------|
| <b>Input Feature Class:</b> | Colombia_Incidences_Cities |
|-----------------------------|----------------------------|

### Dataset Information

|                             |                    |
|-----------------------------|--------------------|
| <b>Input Field:</b>         | CAT_INCIDENCE      |
| <b>Conceptualization:</b>   | INVERSE_DISTANCE   |
| <b>Distance Method:</b>     | EUCLIDEAN          |
| <b>Row Standardization:</b> | False              |
| <b>Distance Threshold:</b>  | 681461,0293 Meters |
| <b>Weights Matrix File:</b> | None               |
| <b>Selection Set:</b>       | False              |

## Spatial Autocorrelation Report-Incidence HRE due Bat

**Moran's Index:** 0,003397  
**z-score:** 3,967254 ■  
**p-value:** 0,000073

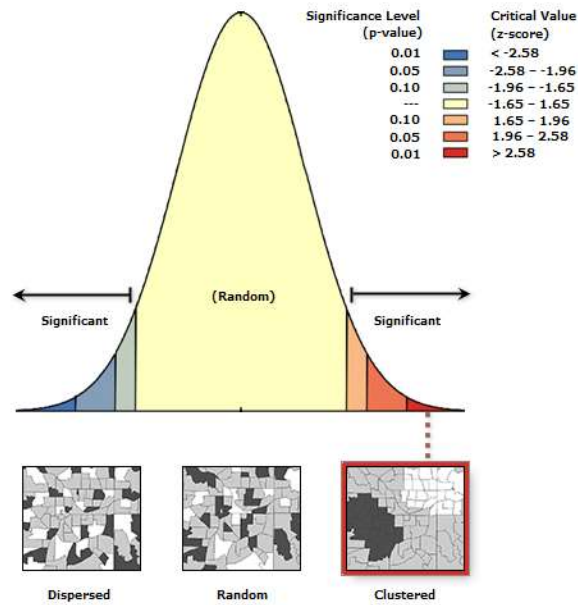

Given the z-score of 3.96725446905, there is a less than 1% likelihood that this clustered pattern could be the result of random chance.

### Global Moran's I Summary

|                        |           |
|------------------------|-----------|
| <b>Moran's Index:</b>  | 0,003397  |
| <b>Expected Index:</b> | -0,000892 |
| <b>Variance:</b>       | 0,000001  |
| <b>z-score:</b>        | 3,967254  |
| <b>p-value:</b>        | 0,000073  |

### Dataset Information

|                             |                            |
|-----------------------------|----------------------------|
| <b>Input Feature Class:</b> | Colombia_Incidences_Cities |
| <b>Input Field:</b>         | BAT                        |
| <b>Conceptualization:</b>   | INVERSE_DISTANCE           |
| <b>Distance Method:</b>     | EUCLIDEAN                  |
| <b>Row Standardization:</b> | False                      |
| <b>Distance Threshold:</b>  | 681461,0293 Meters         |
| <b>Weights Matrix File:</b> | None                       |
| <b>Selection Set:</b>       | False                      |

## Spatial Autocorrelation Report-Incidence HRE due Farm Animal

**Moran's Index:** 0,023751

**z-score:** 13,468863 ■

**p-value:** 0,000000

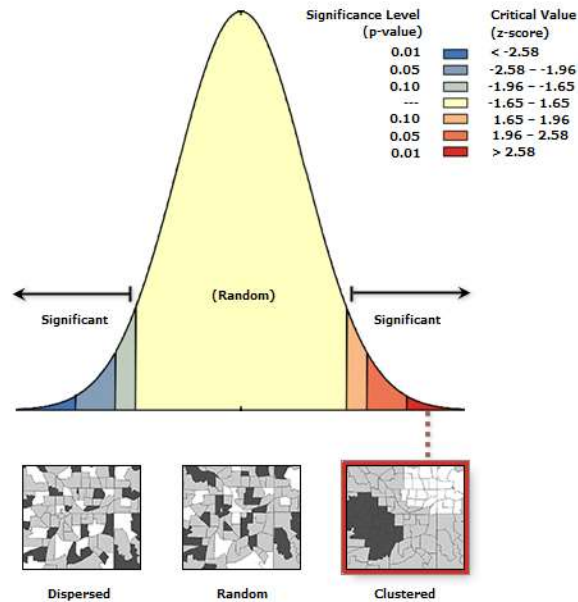

Given the z-score of 13.4688634282, there is a less than 1% likelihood that this clustered pattern could be the result of random chance.

### Global Moran's I Summary

|                        |           |
|------------------------|-----------|
| <b>Moran's Index:</b>  | 0,023751  |
| <b>Expected Index:</b> | -0,000892 |
| <b>Variance:</b>       | 0,000003  |
| <b>z-score:</b>        | 13,468863 |
| <b>p-value:</b>        | 0,000000  |

### Dataset Information

|                             |                            |
|-----------------------------|----------------------------|
| <b>Input Feature Class:</b> | Colombia_Incidences_Cities |
| <b>Input Field:</b>         | FARM_ANIMALS               |
| <b>Conceptualization:</b>   | INVERSE_DISTANCE           |
| <b>Distance Method:</b>     | EUCLIDEAN                  |
| <b>Row Standardization:</b> | False                      |
| <b>Distance Threshold:</b>  | 681461,0293 Meters         |
| <b>Weights Matrix File:</b> | None                       |
| <b>Selection Set:</b>       | False                      |
